# Supplementary material for: Gender Differential Transcriptome in Gastric and Thyroid Cancers
Source: Front Genet. 2020 Jul 30;11:808. doi: 10.3389/fgene.2020.00808 (PMC7406663; doi:10.3389/fgene.2020.00808)
Supplement: Supplementary file 3 [file Table_1.XLSX]

## Sheet: README
Supplementary Table 1. Differentially expressed genes between males and females in tumour (TCGA) and normal (GTEx) stomach tissues.
Supplementary Table 2. Differentially expressed genes between males and females in tumour (TCGA) and normal (GTEx) thyroid tissues.
Supplementary Table 3. Number of X-chromosome genes escaping inactivation by SBG type in stomach and thyroid.
Supplementary Table 4. Differentially expressed genes between stomach tumour and matched-normal tissues (TCGA) in each gender.
Supplementary Table 5. Differentially expressed genes between thyroid tumour and matched-normal tissues (TCGA) in each gender.
Supplementary Table 6. Differential expression between histological subtypes (in males) of hub genes from male-specific module in GC.
Supplementary Table 7. Differential expression between histological subtypes (in females) of hub genes from female-specific module in TC.
Supplementary Table 8. Description of covariates used in differential expression analyses.

## Sheet: Table1
Differentially expressed genes between males and females in tumour (TCGA) and normal (GTEx) stomach tissues
ensembl_ID: ensembl gene ID
gene_symbol: gene symbol
chrom: chromosome number
state: gender differential expression (GDE) state. common - GDE in tumour and normal tissues; tumour_specific - GDE only in tumour tissues; normal_specific - GDE only in normal tissues
log2FC_tumour: log2-fold change (log2FC) of expression between males and females in tumour tissues (edgeR reported). Genes with positive log2FC are over-expressed in males while genes with negative log2FC are over-expressed in females
FDR_tumour: p-value adjusted for multiple-testing using Benjamin-Hochberg procedure. The p-value was derived from a likelihood-ratio test (LRT) for the gender coefficient (male/female) of the linear model
log2FC_normal: log2-fold change (log2FC) of expression between males and females in normal tissues (edgeR reported). Genes with positive log2FC are over-expressed in males while genes with negative log2FC are over-expressed in females
FDR_normal: p-value adjusted for multiple-testing using Benjamin-Hochberg procedure. The p-value was derived from a likelihood-ratio test (LRT) for the gender coefficient (male/female) of the linear model
name: gene name
summary: functional gene summary
ensembl_ID	gene_symbol	chrom	state	log2FC_tumour	FDR_tumour	log2FC_normal	FDR_normal	name	summary
ENSG00000067048	DDX3Y	chrY	common	8.13654	0	8.62284	0	DEAD-box helicase 3 Y-linked	The protein encoded by this gene is a member of the DEAD-box RNA helicase family, characterized by nine conserved motifs, included the conserved Asp-Glu-Ala-Asp (DEAD) motif. These motifs are thought to be involved in ATP binding, hydrolysis, RNA binding, and in the formation of intramolecular interactions. This protein shares high similarity to DDX3X, on the X chromosome, but a deletion of this …
ENSG00000012817	KDM5D	chrY	common	8.38104	3.10176205917429e-316	8.88435	0	lysine demethylase 5D	This gene encodes a protein containing zinc finger domains. A short peptide derived from this protein is a minor histocompatibility antigen which can lead to graft rejection of male donor cells in a female recipient. Alternative splicing results in multiple transcript variants. [provided by RefSeq, Apr 2009].
ENSG00000183878	UTY	chrY	common	8.24127	2.48354763500918e-311	8.38971	0	ubiquitously transcribed tetratricopeptide repeat containing, Y-linked	This gene encodes a protein containing tetratricopeptide repeats which are thought to be involved in protein-protein interactions. The encoded protein is also a minor histocompatibility antigen which may induce graft rejection of male stem cell grafts. A large number of alternatively spliced transcripts have been observed for this gene, but the full length nature of some of these variants has not…
ENSG00000165246	NLGN4Y	chrY	common	7.52323	0	7.28258	3.22894e-119	neuroligin 4 Y-linked	This gene encodes a type I membrane protein that belongs to the family of neuroligins, which are cell adhesion molecules present at the postsynaptic side of the synapse, and may be essential for the formation of functional synapses. Alternatively spliced transcript variants have been found for this gene.[provided by RefSeq, Mar 2011].
ENSG00000067646	ZFY	chrY	common	8.06911	1.40684e-304	8.29861	0	zinc finger protein Y-linked	This gene encodes a zinc finger-containing protein that may function as a transcription factor. This gene was once a candidate gene for the testis-determining factor (TDF) and was erroneously referred to as TDF. [provided by RefSeq, Jul 2008].
ENSG00000114374	USP9Y	chrY	common	7.51852	6.36341e-291	8.70864	0	ubiquitin specific peptidase 9 Y-linked	This gene is a member of the peptidase C19 family. It encodes a protein that is similar to ubiquitin-specific proteases, which cleave the ubiquitin moiety from ubiquitin-fused precursors and ubiquitinylated proteins. [provided by RefSeq, Mar 2009].
ENSG00000198692	EIF1AY	chrY	common	8.37792	9.74941e-270	8.26484	0	eukaryotic translation initiation factor 1A Y-linked	This gene is located on the non-recombining region of the Y chromosome. It encodes a protein related to eukaryotic translation initiation factor 1A (EIF1A), which may function in stabilizing the binding of the initiator Met-tRNA to 40S ribosomal subunits. Alternative splicing results in multiple transcript variants. [provided by RefSeq, Jul 2013].
ENSG00000129824	RPS4Y1	chrY	common	9.06132	4.00529e-226	9.01943	0	ribosomal protein S4 Y-linked 1	Cytoplasmic ribosomes, organelles that catalyze protein synthesis, consist of a small 40S subunit and a large 60S subunit. Together these subunits are composed of 4 RNA species and approximately 80 structurally distinct proteins. This gene encodes ribosomal protein S4, a component of the 40S subunit. Ribosomal protein S4 is the only ribosomal protein known to be encoded by more than one gene, nam…
ENSG00000229807	XIST	chrX	common	-7.71995	1.57045e-102	-9.06706	0	X inactive specific transcript	NA
ENSG00000005889	ZFX	chrX	common	-0.505208	9.18964e-22	-0.49856	6.19381e-18	zinc finger protein X-linked	This gene on the X chromosome is structurally similar to a related gene on the Y chromosome. It encodes a member of the krueppel C2H2-type zinc-finger protein family. The full-length protein contains an acidic transcriptional activation domain (AD), a nuclear localization sequence (NLS) and a DNA binding domain (DBD) consisting of 13 C2H2-type zinc fingers. Studies in mouse embryonic and adult he…
ENSG00000126012	KDM5C	chrX	common	-0.50127	5.02598e-21	-0.47013	4.86464e-45	lysine demethylase 5C	This gene is a member of the SMCY homolog family and encodes a protein with one ARID domain, one JmjC domain, one JmjN domain and two PHD-type zinc fingers. The DNA-binding motifs suggest this protein is involved in the regulation of transcription and chromatin remodeling. Mutations in this gene have been associated with X-linked cognitive disability. Alternative splicing results in multiple tran…
ENSG00000173674	EIF1AX	chrX	common	-0.5862	4.1943e-20	-0.479598	2.49659e-20	eukaryotic translation initiation factor 1A X-linked	This gene encodes an essential eukaryotic translation initiation factor. The protein is required for the binding of the 43S complex (a 40S subunit, eIF2/GTP/Met-tRNAi and eIF3) to the 5' end of capped RNA. [provided by RefSeq, Jul 2008].
ENSG00000086712	TXLNG	chrX	tumour_specific	-0.536234	3.26471e-17	NA	NA	taxilin gamma	This gene encodes a member of the taxilin family. The encoded protein binds to the C-terminal coiled-coil region of syntaxin family members 1A, 3A and 4A, and may play a role in intracellular vesicle trafficking. This gene is up-regulated by lipopolysaccharide and the gene product may be involved in cell cycle regulation. The related mouse protein was also shown to inhibit activating transcriptio…
ENSG00000225470	JPX	chrX	common	-0.448108	3.51401e-14	-0.590105	3.76299e-35	JPX transcript, XIST activator	NA
ENSG00000169249	ZRSR2	chrX	common	-0.50054	5.39723e-13	-0.343055	2.15872e-08	zinc finger CCCH-type, RNA binding motif and serine/arginine rich 2	This gene encodes an essential splicing factor. The encoded protein associates with the U2 auxiliary factor heterodimer, which is required for the recognition of a functional 3' splice site in pre-mRNA splicing, and may play a role in network interactions during spliceosome assembly. [provided by RefSeq, Jul 2008].
ENSG00000169895	SYAP1	chrX	common	-0.438079	1.59497e-11	-0.269764	0.000475611	synapse associated protein 1	NA
ENSG00000072501	SMC1A	chrX	common	-0.422496	2.53624e-10	-0.253209	1.05139e-09	structural maintenance of chromosomes 1A	Proper cohesion of sister chromatids is a prerequisite for the correct segregation of chromosomes during cell division. The cohesin multiprotein complex is required for sister chromatid cohesion. This complex is composed partly of two structural maintenance of chromosomes (SMC) proteins, SMC3 and either SMC1B or the protein encoded by this gene. Most of the cohesin complexes dissociate from the c…
ENSG00000147050	KDM6A	chrX	common	-0.437032	3.45802e-10	-0.64575	1.0244e-28	lysine demethylase 6A	This gene is located on the X chromosome and is the corresponding locus to a Y-linked gene which encodes a tetratricopeptide repeat (TPR) protein. The encoded protein of this gene contains a JmjC-domain and catalyzes the demethylation of tri/dimethylated histone H3. Multiple alternatively spliced transcript variants have been found for this gene. [provided by RefSeq, Apr 2014].
ENSG00000130985	UBA1	chrX	common	-0.326648	3.1324e-09	-0.240846	1.24603e-08	ubiquitin like modifier activating enzyme 1	The protein encoded by this gene catalyzes the first step in ubiquitin conjugation to mark cellular proteins for degradation. This gene complements an X-linked mouse temperature-sensitive defect in DNA synthesis, and thus may function in DNA repair. It is part of a gene cluster on chromosome Xp11.23. Alternatively spliced transcript variants that encode the same protein have been described. [prov…
ENSG00000215301	DDX3X	chrX	common	-0.296622	3.1324e-09	-0.321572	0.000709093	DEAD-box helicase 3 X-linked	The protein encoded by this gene is a member of the large DEAD-box protein family, that is defined by the presence of the conserved Asp-Glu-Ala-Asp (DEAD) motif, and has ATP-dependent RNA helicase activity. This protein has been reported to display a high level of RNA-independent ATPase activity, and unlike most DEAD-box helicases, the ATPase activity is thought to be stimulated by both RNA and D…
ENSG00000198034	RPS4X	chrX	common	-0.490005	6.60948e-09	-0.523074	1.24348e-29	ribosomal protein S4 X-linked	Cytoplasmic ribosomes, organelles that catalyze protein synthesis, consist of a small 40S subunit and a large 60S subunit. Together these subunits are composed of 4 RNA species and approximately 80 structurally distinct proteins. This gene encodes ribosomal protein S4, a component of the 40S subunit. Ribosomal protein S4 is the only ribosomal protein known to be encoded by more than one gene, nam…
ENSG00000205664	RP11-706O15.1	chrX	common	-0.581125	1.71067e-08	-0.478818	0.00673344	NA	NA
ENSG00000130021	HDHD1	chrX	common	-0.597549	1.37696e-07	-0.906687	8.91341e-24	pseudouridine 5'-phosphatase	This gene encodes a member of the haloacid dehalogenase-like (HAD) hydrolase superfamily. The encoded protein has no known biological function. This gene has a pseudogene on chromosome 1. Multiple alternatively spliced transcript variants encoding different isoforms have been identified. [provided by RefSeq, Jul 2010].
ENSG00000183943	PRKX	chrX	common	-0.537198	2.19697e-07	-0.375979	2.68963e-06	protein kinase X-linked	This gene encodes a serine threonine protein kinase that has similarity to the catalytic subunit of cyclic AMP dependent protein kinases. The encoded protein is developmentally regulated and may be involved in renal epithelial morphogenesis. This protein may also be involved in macrophage and granulocyte maturation. Abnormal recombination between this gene and a related pseudogene on chromosome Y…
ENSG00000196459	TRAPPC2	chrX	common	-0.355972	2.98079e-07	-0.183603	0.0186913	trafficking protein particle complex 2	The protein encoded by this gene is thought to be part of a large multi-subunit complex involved in the targeting and fusion of endoplasmic reticulum-to-Golgi transport vesicles with their acceptor compartment. In addition, the encoded protein can bind c-myc promoter-binding protein 1 and block its transcriptional repression capability. Mutations in this gene are a cause of spondyloepiphyseal dys…
ENSG00000124486	USP9X	chrX	tumour_specific	-0.310361	1.70593e-06	NA	NA	ubiquitin specific peptidase 9 X-linked	This gene is a member of the peptidase C19 family and encodes a protein that is similar to ubiquitin-specific proteases. Though this gene is located on the X chromosome, it escapes X-inactivation. Mutations in this gene have been associated with Turner syndrome. Alternate transcriptional splice variants, encoding different isoforms, have been characterized. [provided by RefSeq, Jul 2008].
ENSG00000101846	STS	chrX	common	-0.663498	5.6122e-06	-0.603845	4.52423e-10	steroid sulfatase	This gene encodes a multi-pass membrane protein that is localized to the endoplasmic reticulum. It belongs to the sulfatase family and hydrolyzes several 3-beta-hydroxysteroid sulfates, which serve as metabolic precursors for estrogens, androgens, and cholesterol. Mutations in this gene are associated with X-linked ichthyosis (XLI). Alternatively spliced transcript variants resulting from the use…
ENSG00000130741	EIF2S3	chrX	common	-0.333855	4.88747e-05	-0.194532	0.01109	eukaryotic translation initiation factor 2 subunit gamma	The protein encoded by this gene is the largest subunit of a heterotrimeric GTP-binding protein involved in the recruitment of methionyl-tRNA(i) to the 40 S ribosomal subunit. [provided by RefSeq, Jan 2010].
ENSG00000180182	MED14	chrX	tumour_specific	-0.29873	0.000187592	NA	NA	mediator complex subunit 14	The activation of gene transcription is a multistep process that is triggered by factors that recognize transcriptional enhancer sites in DNA. These factors work with co-activators to direct transcriptional initiation by the RNA polymerase II apparatus. The protein encoded by this gene is a subunit of the CRSP (cofactor required for SP1 activation) complex, which, along with TFIID, is required fo…
ENSG00000069482	GAL	chr11	tumour_specific	-1.49742	0.000232164	NA	NA	galanin and GMAP prepropeptide	This gene encodes a neuroendocrine peptide that is widely expressed in the central and peripheral nervous systems and also the gastrointestinal tract, pancreas, adrenal gland and urogenital tract. The encoded protein is a precursor that is proteolytically processed to generate two mature peptides: galanin and galanin message-associated peptide (GMAP). Galanin has diverse physiological functions i…
ENSG00000046651	OFD1	chrX	tumour_specific	-0.28112	0.00070914	NA	NA	OFD1 centriole and centriolar satellite protein	This gene is located on the X chromosome and encodes a centrosomal protein. A knockout mouse model has been used to study the effect of mutations in this gene. The mouse gene is also located on the X chromosome, however, unlike the human gene it is not subject to X inactivation. Mutations in this gene are associated with oral-facial-digital syndrome type I and Simpson-Golabi-Behmel syndrome type …
ENSG00000079435	LIPE	chr19	tumour_specific	-0.517527	0.00106373	NA	NA	lipase E, hormone sensitive type	The protein encoded by this gene has a long and a short form, generated by use of alternative translational start codons. The long form is expressed in steroidogenic tissues such as testis, where it converts cholesteryl esters to free cholesterol for steroid hormone production. The short form is expressed in adipose tissue, among others, where it hydrolyzes stored triglycerides to free fatty acid…
ENSG00000102225	CDK16	chrX	tumour_specific	-0.257296	0.0013813	NA	NA	cyclin dependent kinase 16	The protein encoded by this gene belongs to the cdc2/cdkx subfamily of the ser/thr family of protein kinases. It may play a role in signal transduction cascades in terminally differentiated cells; in exocytosis; and in transport of secretory cargo from the endoplasmic reticulum. This gene is thought to escape X inactivation. Alternative splicing results in multiple transcript variants encoding di…
ENSG00000187867	PALM3	chr19	tumour_specific	0.98294	0.00237366	NA	NA	paralemmin 3	NA
ENSG00000253626	EIF5AL1	chr10	tumour_specific	-0.494324	0.00243873	NA	NA	eukaryotic translation initiation factor 5A like 1	NA
ENSG00000069509	FUNDC1	chrX	common	-0.347324	0.00387356	-0.408154	0.000821165	FUN14 domain containing 1	This gene encodes a protein with a FUN14 superfamily domain. The function of the encoded protein is not known. [provided by RefSeq, Sep 2011].
ENSG00000006757	PNPLA4	chrX	common	-0.461046	0.00408454	-0.633512	3.50945e-08	patatin like phospholipase domain containing 4	This gene encodes a member of the patatin-like family of phospholipases. The encoded enzyme has both triacylglycerol lipase and transacylase activities and may be involved in adipocyte triglyceride homeostasis. Alternate splicing results in multiple transcript variants. A pseudogene of this gene is found on chromosome Y. [provided by RefSeq, Feb 2010].
ENSG00000182272	B4GALNT4	chr11	tumour_specific	-1.11193	0.00421849	NA	NA	beta-1,4-N-acetyl-galactosaminyltransferase 4	NA
ENSG00000101901	ALG13	chrX	tumour_specific	-0.290027	0.00580039	NA	NA	ALG13 UDP-N-acetylglucosaminyltransferase subunit	The protein encoded by this gene is a subunit of a bipartite UDP-N-acetylglucosamine transferase. It heterodimerizes with asparagine-linked glycosylation 14 homolog to form a functional UDP-GlcNAc glycosyltransferase that catalyzes the second sugar addition of the highly conserved oligosaccharide precursor in endoplasmic reticulum N-linked glycosylation. Multiple transcript variants encoding diff…
ENSG00000106351	AGFG2	chr7	tumour_specific	0.4161	0.00580039	NA	NA	ArfGAP with FG repeats 2	This gene is a member of the HIV-1 Rev binding protein (HRB) family and encodes a protein with one Arf-GAP zinc finger domain, several phe-gly (FG) motifs, and four asn-pro-phe (NPF) motifs. This protein interacts with Eps15 homology (EH) domains and plays a role in the Rev export pathway, which mediates the nucleocytoplasmic transfer of proteins and RNAs. Alternatively spliced transcript variant…
ENSG00000100591	AHSA1	chr14	tumour_specific	-0.245699	0.00764366	NA	NA	activator of HSP90 ATPase activity 1	NA
ENSG00000153395	LPCAT1	chr5	tumour_specific	-0.391168	0.0105283	NA	NA	lysophosphatidylcholine acyltransferase 1	This gene encodes a member of the 1-acyl-sn-glycerol-3-phosphate acyltransferase family of proteins. The encoded enzyme plays a role in phospholipid metabolism, specifically in the conversion of lysophosphatidylcholine to phosphatidylcholine in the presence of acyl-CoA. This process is important in the synthesis of lung surfactant and platelet-activating factor (PAF). Elevated expression of this …
ENSG00000131748	STARD3	chr17	tumour_specific	0.640933	0.0114239	NA	NA	StAR related lipid transfer domain containing 3	This gene encodes a member of a subfamily of lipid trafficking proteins that are characterized by a C-terminal steroidogenic acute regulatory domain and an N-terminal metastatic lymph node 64 domain. The encoded protein localizes to the membranes of late endosomes and may be involved in exporting cholesterol. Alternative splicing results in multiple transcript variants.[provided by RefSeq, Oct 20…
ENSG00000149531	FRG1B	chr20	common	0.405636	0.0114239	0.503637	1.97311e-12	FSHD region gene 1 family member B, pseudogene	NA
ENSG00000056998	GYG2	chrX	common	-0.590696	0.0177004	-0.607917	2.02002e-06	glycogenin 2	This gene encodes a member of the the glycogenin family. Glycogenin is a self-glucosylating protein involved in the initiation reactions of glycogen biosynthesis. A gene on chromosome 3 encodes the muscle glycogenin and this X-linked gene encodes the glycogenin mainly present in liver; both are involved in blood glucose homeostasis. This gene has a short version on chromosome Y, which is 3' trunc…
ENSG00000147180	ZNF711	chrX	tumour_specific	-0.419909	0.0200123	NA	NA	zinc finger protein 711	This gene encodes a zinc finger protein of unknown function. It bears similarity to a zinc finger protein which acts as a transcriptional activator. This gene lies in a region of the X chromosome which has been associated with cognitive disability. [provided by RefSeq, Jul 2008].
ENSG00000046647	GEMIN8	chrX	common	-0.242586	0.021427	-0.158414	0.0323685	gem nuclear organelle associated protein 8	The protein encoded by this gene is part of the SMN complex, which is necessary for spliceosomal snRNP assembly in the cytoplasm and pre-mRNA splicing in the nucleus. The encoded protein binds to both SMN1 and the GEMIN6/GEMIN7 heterodimer, mediating their interaction. This protein is found in nuclear Gemini of Cajal bodies (gems) and in the cytoplasm. Three transcript variants encoding the same …
ENSG00000116830	TTF2	chr1	tumour_specific	-0.248958	0.0227136	NA	NA	transcription termination factor 2	This gene encodes a member of the SWI2/SNF2 family of proteins, which play a critical role in altering protein-DNA interactions. The encoded protein has been shown to have dsDNA-dependent ATPase activity and RNA polymerase II termination activity. This protein interacts with cell division cycle 5-like, associates with human splicing complexes, and plays a role in pre-mRNA splicing. [provided by R…
ENSG00000170684	ZNF296	chr19	tumour_specific	-0.36705	0.0391248	NA	NA	zinc finger protein 296	NA
ENSG00000115541	HSPE1	chr2	tumour_specific	-0.30823	0.044098	NA	NA	heat shock protein family E (Hsp10) member 1	This gene encodes a major heat shock protein which functions as a chaperonin. Its structure consists of a heptameric ring which binds to another heat shock protein in order to form a symmetric, functional heterodimer which enhances protein folding in an ATP-dependent manner. This gene and its co-chaperonin, HSPD1, are arranged in a head-to-head orientation on chromosome 2. Naturally occurring rea…
ENSG00000170638	TRABD	chr22	tumour_specific	-0.245227	0.044098	NA	NA	TraB domain containing	NA
ENSG00000170835	CEL	chr9	common	1.32966	0.044098	-0.789984	0.00879782	carboxyl ester lipase	The protein encoded by this gene is a glycoprotein secreted from the pancreas into the digestive tract and from the lactating mammary gland into human milk. The physiological role of this protein is in cholesterol and lipid-soluble vitamin ester hydrolysis and absorption. This encoded protein promotes large chylomicron production in the intestine. Also its presence in plasma suggests its interact…
ENSG00000167797	CDK2AP2	chr11	tumour_specific	-0.294196	0.0466917	NA	NA	cyclin dependent kinase 2 associated protein 2	This gene encodes a protein that interacts with cyclin-dependent kinase 2 associated protein 1. Pseudogenes associated with this gene are located on chromosomes 7 and 9. Alternatively spliced transcript variants have been observed for this gene. [provided by RefSeq, Dec 2012].
ENSG00000108384	RAD51C	chr17	tumour_specific	-0.234043	0.0493704	NA	NA	RAD51 paralog C	This gene is a member of the RAD51 family. RAD51 family members are highly similar to bacterial RecA and Saccharomyces cerevisiae Rad51 and are known to be involved in the homologous recombination and repair of DNA. This protein can interact with other RAD51 paralogs and is reported to be important for Holliday junction resolution. Mutations in this gene are associated with Fanconi anemia-like sy…
ENSG00000077454	LRCH4	chr7	tumour_specific	0.258951	0.0493857	NA	NA	leucine rich repeats and calponin homology domain containing 4	This gene encodes a protein that contains leucine-rich repeats (LRR) at its amino terminus and that is known to be involved in ligand binding. The carboxyl terminus may act as a membrane anchor. Identified structural elements suggest that the encoded protein resembles a receptor. [provided by RefSeq, Jul 2008].
ENSG00000006756	ARSD	chrX	normal_specific	NA	NA	-0.80134	2.70934e-05	arylsulfatase D	The protein encoded by this gene is a member of the sulfatase family. Sulfatases are essential for the correct composition of bone and cartilage matrix. The encoded protein is postranslationally glycosylated and localized to the lysosome. This gene is located within a cluster of similar arylsulfatase genes on chromosome X. A related pseudogene has been identified in the pseudoautosomal region of …
ENSG00000002586	CD99	chrX	normal_specific	NA	NA	0.526553	5.08997e-05	CD99 molecule (Xg blood group)	The protein encoded by this gene is a cell surface glycoprotein involved in leukocyte migration, T-cell adhesion, ganglioside GM1 and transmembrane protein transport, and T-cell death by a caspase-independent pathway. In addition, the encoded protein may have the ability to rearrange the actin cytoskeleton and may also act as an oncosuppressor in osteosarcoma. This gene is found in the pseudoauto…
ENSG00000102854	MSLN	chr16	normal_specific	NA	NA	-1.21393	0.00125015	mesothelin	This gene encodes a preproprotein that is proteolytically processed to generate two protein products, megakaryocyte potentiating factor and mesothelin. Megakaryocyte potentiating factor functions as a cytokine that can stimulate colony formation of bone marrow megakaryocytes. Mesothelin is a glycosylphosphatidylinositol-anchored cell-surface protein that may function as a cell adhesion protein. T…
ENSG00000113739	STC2	chr5	normal_specific	NA	NA	0.937625	0.00274145	stanniocalcin 2	This gene encodes a secreted, homodimeric glycoprotein that is expressed in a wide variety of tissues and may have autocrine or paracrine functions. The encoded protein has 10 of its 15 cysteine residues conserved among stanniocalcin family members and is phosphorylated by casein kinase 2 exclusively on its serine residues. Its C-terminus contains a cluster of histidine residues which may interac…
ENSG00000066735	KIF26A	chr14	normal_specific	NA	NA	-0.359812	0.00274443	kinesin family member 26A	NA
ENSG00000101255	TRIB3	chr20	normal_specific	NA	NA	1.12084	0.00300858	tribbles pseudokinase 3	The protein encoded by this gene is a putative protein kinase that is induced by the transcription factor NF-kappaB. The encoded protein is a negative regulator of NF-kappaB and can also sensitize cells to TNF- and TRAIL-induced apoptosis. In addition, this protein can negatively regulate the cell survival serine-threonine kinase AKT1. Differential promoter usage and alternate splicing result in …
ENSG00000007516	BAIAP3	chr16	normal_specific	NA	NA	-0.62592	0.00412711	BAI1 associated protein 3	This p53-target gene encodes a brain-specific angiogenesis inhibitor. The protein is a seven-span transmembrane protein and a member of the secretin receptor family. It interacts with the cytoplasmic region of brain-specific angiogenesis inhibitor 1. This protein also contains two C2 domains, which are often found in proteins involved in signal transduction or membrane trafficking. Its expression…
ENSG00000110090	CPT1A	chr11	normal_specific	NA	NA	-0.311754	0.00484538	carnitine palmitoyltransferase 1A	The mitochondrial oxidation of long-chain fatty acids is initiated by the sequential action of carnitine palmitoyltransferase I (which is located in the outer membrane and is detergent-labile) and carnitine palmitoyltransferase II (which is located in the inner membrane and is detergent-stable), together with a carnitine-acylcarnitine translocase. CPT I is the key enzyme in the carnitine-dependen…
ENSG00000169239	CA5B	chrX	normal_specific	NA	NA	-0.235882	0.00664271	carbonic anhydrase 5B	Carbonic anhydrases (CAs) are a large family of zinc metalloenzymes that catalyze the reversible hydration of carbon dioxide. They participate in a variety of biological processes, including respiration, calcification, acid-base balance, bone resorption, and the formation of aqueous humor, cerebrospinal fluid, saliva, and gastric acid. They show extensive diversity in tissue distribution and in t…
ENSG00000112972	HMGCS1	chr5	normal_specific	NA	NA	-0.730464	0.00876575	3-hydroxy-3-methylglutaryl-CoA synthase 1	NA
ENSG00000176046	NUPR1	chr16	normal_specific	NA	NA	0.451283	0.010203	nuclear protein 1, transcriptional regulator	NA
ENSG00000168016	TRANK1	chr3	normal_specific	NA	NA	0.584949	0.0133658	tetratricopeptide repeat and ankyrin repeat containing 1	NA
ENSG00000107829	FBXW4	chr10	normal_specific	NA	NA	0.208503	0.016993	F-box and WD repeat domain containing 4	This gene is a member of the F-box/WD-40 gene family, which recruit specific target proteins through their WD-40 protein-protein binding domains for ubiquitin mediated degradation. In mouse, a highly similar protein is thought to be responsible for maintaining the apical ectodermal ridge of developing limb buds; disruption of the mouse gene results in the absence of central digits, underdeveloped…
ENSG00000117450	PRDX1	chr1	normal_specific	NA	NA	-0.289492	0.0220112	peroxiredoxin 1	This gene encodes a member of the peroxiredoxin family of antioxidant enzymes, which reduce hydrogen peroxide and alkyl hydroperoxides. The encoded protein may play an antioxidant protective role in cells, and may contribute to the antiviral activity of CD8(+) T-cells. This protein may have a proliferative effect and play a role in cancer development or progression. Four transcript variants encod…
ENSG00000178773	CPNE7	chr16	normal_specific	NA	NA	-0.770864	0.0235271	copine 7	This gene encodes a member of the copine family, which is composed of calcium-dependent membrane-binding proteins. The gene product contains two N-terminal C2 domains and one von Willebrand factor A domain. The encoded protein may be involved in membrane trafficking. Two alternatively spliced transcript variants encoding different isoforms have been found for this gene. [provided by RefSeq, Nov 2…
ENSG00000136872	ALDOB	chr9	normal_specific	NA	NA	-1.38089	0.0243314	aldolase, fructose-bisphosphate B	Fructose-1,6-bisphosphate aldolase (EC 4.1.2.13) is a tetrameric glycolytic enzyme that catalyzes the reversible conversion of fructose-1,6-bisphosphate to glyceraldehyde 3-phosphate and dihydroxyacetone phosphate. Vertebrates have 3 aldolase isozymes which are distinguished by their electrophoretic and catalytic properties. Differences indicate that aldolases A, B, and C are distinct proteins, t…
ENSG00000005448	WDR54	chr2	normal_specific	NA	NA	-0.257506	0.0246787	WD repeat domain 54	NA
ENSG00000068078	FGFR3	chr4	normal_specific	NA	NA	-0.674451	0.0246787	fibroblast growth factor receptor 3	This gene encodes a member of the fibroblast growth factor receptor (FGFR) family, with its amino acid sequence being highly conserved between members and among divergent species. FGFR family members differ from one another in their ligand affinities and tissue distribution. A full-length representative protein would consist of an extracellular region, composed of three immunoglobulin-like domain…
ENSG00000214717	ZBED1	chrX	normal_specific	NA	NA	0.153304	0.0246787	zinc finger BED-type containing 1	This gene is located in the pseudoautosomal region 1 (PAR1) of X and Y chromosomes. It was earlier identified as a gene with similarity to Ac transposable elements, however, was found not to have transposase activity. Later studies show that this gene product is localized in the nucleus and functions as a transcription factor. It binds to DNA elements found in the promoter regions of several gene…
ENSG00000169903	TM4SF4	chr3	normal_specific	NA	NA	-0.674081	0.0266134	transmembrane 4 L six family member 4	The protein encoded by this gene is a member of the transmembrane 4 superfamily, also known as the tetraspanin family. Most of these members are cell-surface proteins that are characterized by the presence of four hydrophobic domains. The proteins mediate signal transduction events that play a role in the regulation of cell development, activation, growth and motility. This encoded protein is a c…
ENSG00000156738	MS4A1	chr11	normal_specific	NA	NA	-1.2427	0.030255	membrane spanning 4-domains A1	This gene encodes a member of the membrane-spanning 4A gene family. Members of this nascent protein family are characterized by common structural features and similar intron/exon splice boundaries and display unique expression patterns among hematopoietic cells and nonlymphoid tissues. This gene encodes a B-lymphocyte surface molecule which plays a role in the development and differentiation of B…
ENSG00000065911	MTHFD2	chr2	normal_specific	NA	NA	0.544656	0.0323685	methylenetetrahydrofolate dehydrogenase (NADP+ dependent) 2, methenyltetrahydrofolate cyclohydrolase	This gene encodes a nuclear-encoded mitochondrial bifunctional enzyme with methylenetetrahydrofolate dehydrogenase and methenyltetrahydrofolate cyclohydrolase activities. The enzyme functions as a homodimer and is unique in its absolute requirement for magnesium and inorganic phosphate. Formation of the enzyme-magnesium complex allows binding of NAD. Alternative splicing results in two different …
ENSG00000104884	ERCC2	chr19	normal_specific	NA	NA	-0.166281	0.0323685	ERCC excision repair 2, TFIIH core complex helicase subunit	The nucleotide excision repair pathway is a mechanism to repair damage to DNA. The protein encoded by this gene is involved in transcription-coupled nucleotide excision repair and is an integral member of the basal transcription factor BTF2/TFIIH complex. The gene product has ATP-dependent DNA helicase activity and belongs to the RAD3/XPD subfamily of helicases. Defects in this gene can result in…
ENSG00000116815	CD58	chr1	normal_specific	NA	NA	-0.179647	0.0323685	CD58 molecule	This gene encodes a member of the immunoglobulin superfamily. The encoded protein is a ligand of the T lymphocyte CD2 protein, and functions in adhesion and activation of T lymphocytes. The protein is localized to the plasma membrane. Alternatively spliced transcript variants have been described. [provided by RefSeq, Jan 2009].
ENSG00000120709	FAM53C	chr5	normal_specific	NA	NA	0.250089	0.0323685	family with sequence similarity 53 member C	The protein encoded by this gene belongs to the FAM53 protein family. FAM53 protein family members bind to a transcriptional regulator that modulates cell proliferation. Alternative splicing results in multiple transcript variants. [provided by RefSeq, Apr 2017].
ENSG00000127585	FBXL16	chr16	normal_specific	NA	NA	-0.387467	0.0323685	F-box and leucine rich repeat protein 16	Members of the F-box protein family, such as FBXL16, are characterized by an approximately 40-amino acid F-box motif. SCF complexes, formed by SKP1 (MIM 601434), cullin (see CUL1; MIM 603134), and F-box proteins, act as protein-ubiquitin ligases. F-box proteins interact with SKP1 through the F box, and they interact with ubiquitination targets through other protein interaction domains (Jin et al.…
ENSG00000151726	ACSL1	chr4	normal_specific	NA	NA	-0.271734	0.0323685	acyl-CoA synthetase long chain family member 1	The protein encoded by this gene is an isozyme of the long-chain fatty-acid-coenzyme A ligase family. Although differing in substrate specificity, subcellular localization, and tissue distribution, all isozymes of this family convert free long-chain fatty acids into fatty acyl-CoA esters, and thereby play a key role in lipid biosynthesis and fatty acid degradation. Several transcript variants enc…
ENSG00000164309	CMYA5	chr5	normal_specific	NA	NA	0.633233	0.0323685	cardiomyopathy associated 5	NA
ENSG00000167508	MVD	chr16	normal_specific	NA	NA	-0.421324	0.0323685	mevalonate diphosphate decarboxylase	The enzyme mevalonate pyrophosphate decarboxylase catalyzes the conversion of mevalonate pyrophosphate into isopentenyl pyrophosphate in one of the early steps in cholesterol biosynthesis. It decarboxylates and dehydrates its substrate while hydrolyzing ATP. [provided by RefSeq, Jul 2008].
ENSG00000169442	CD52	chr1	normal_specific	NA	NA	-0.624376	0.0323685	CD52 molecule	NA
ENSG00000188803	SHISA6	chr17	normal_specific	NA	NA	-0.569065	0.0323685	shisa family member 6	NA
ENSG00000204590	GNL1	chr6	normal_specific	NA	NA	0.17432	0.0323685	G protein nucleolar 1 (putative)	The GNL1 gene, identified in the human major histocompatibility complex class I region, shows a high degree of similarity with its mouse counterpart. The GNL1 gene is located less than 2 kb centromeric to HLA-E, in the same transcriptional orientation. GNL1 is telomeric to HLA-B and HLA-C. [provided by RefSeq, Jul 2008].
ENSG00000118137	APOA1	chr11	normal_specific	NA	NA	-0.892799	0.0350745	apolipoprotein A1	This gene encodes apolipoprotein A-I, which is the major protein component of high density lipoprotein (HDL) in plasma. The encoded preproprotein is proteolytically processed to generate the mature protein, which promotes cholesterol efflux from tissues to the liver for excretion, and is a cofactor for lecithin cholesterolacyltransferase (LCAT), an enzyme responsible for the formation of most pla…
ENSG00000124749	COL21A1	chr6	normal_specific	NA	NA	1.07834	0.0353515	collagen type XXI alpha 1 chain	This gene encodes the alpha chain of type XXI collagen, a member of the FACIT (fibril-associated collagens with interrupted helices) collagen family. Type XXI collagen is localized to tissues containing type I collagen and maintains the integrity of the extracellular matrix. Alternative splicing results in multiple transcript variants. [provided by RefSeq, Jan 2016].
ENSG00000173947	PIFO	chr1	normal_specific	NA	NA	0.441104	0.0353515	primary cilia formation	NA
ENSG00000084207	GSTP1	chr11	normal_specific	NA	NA	-0.275417	0.0423846	glutathione S-transferase pi 1	Glutathione S-transferases (GSTs) are a family of enzymes that play an important role in detoxification by catalyzing the conjugation of many hydrophobic and electrophilic compounds with reduced glutathione. Based on their biochemical, immunologic, and structural properties, the soluble GSTs are categorized into 4 main classes: alpha, mu, pi, and theta. This GST family member is a polymorphic gen…
ENSG00000131446	MGAT1	chr5	normal_specific	NA	NA	0.168572	0.0428122	alpha-1,3-mannosyl-glycoprotein 2-beta-N-acetylglucosaminyltransferase	There are believed to be over 100 different glycosyltransferases involved in the synthesis of protein-bound and lipid-bound oligosaccharides. UDP-N-acetylglucosamine:alpha-3-D-mannoside beta-1,2-N-acetylglucosaminyltransferase I is a medial-Golgi enzyme essential for the synthesis of hybrid and complex N-glycans. The protein, encoded by a single exon, shows typical features of a type II transmemb…
ENSG00000052802	MSMO1	chr4	normal_specific	NA	NA	-0.576187	0.0448405	methylsterol monooxygenase 1	Sterol-C4-mehtyl oxidase-like protein was isolated based on its similarity to the yeast ERG25 protein. It contains a set of putative metal binding motifs with similarity to that seen in a family of membrane desaturases-hydroxylases. The protein is localized to the endoplasmic reticulum membrane and is believed to function in cholesterol biosynthesis. Alternatively spliced transcript variants enco…
ENSG00000027697	IFNGR1	chr6	normal_specific	NA	NA	0.250758	0.0499102	interferon gamma receptor 1	This gene (IFNGR1) encodes the ligand-binding chain (alpha) of the gamma interferon receptor. Human interferon-gamma receptor is a heterodimer of IFNGR1 and IFNGR2. A genetic variation in IFNGR1 is associated with susceptibility to Helicobacter pylori infection. In addition, defects in IFNGR1 are a cause of mendelian susceptibility to mycobacterial disease, also known as familial disseminated aty…
ENSG00000104549	SQLE	chr8	normal_specific	NA	NA	-0.544371	0.0499102	squalene epoxidase	Squalene epoxidase catalyzes the first oxygenation step in sterol biosynthesis and is thought to be one of the rate-limiting enzymes in this pathway. [provided by RefSeq, Jul 2008].
ENSG00000109814	UGDH	chr4	normal_specific	NA	NA	-0.353451	0.0499102	UDP-glucose 6-dehydrogenase	The protein encoded by this gene converts UDP-glucose to UDP-glucuronate and thereby participates in the biosynthesis of glycosaminoglycans such as hyaluronan, chondroitin sulfate, and heparan sulfate. These glycosylated compounds are common components of the extracellular matrix and likely play roles in signal transduction, cell migration, and cancer growth and metastasis. The expression of this…
ENSG00000115556	PLCD4	chr2	normal_specific	NA	NA	0.900299	0.0499102	phospholipase C delta 4	This gene encodes a member of the delta class of phospholipase C enzymes. Phospholipase C enzymes play a critical role in many cellular processes by hydrolyzing phosphatidylinositol 4,5-bisphosphate into two intracellular second messengers, inositol 1,4,5-trisphosphate and diacylglycerol. Expression of this gene may be a marker for cancer. [provided by RefSeq, Jan 2011].
ENSG00000128594	LRRC4	chr7	normal_specific	NA	NA	0.63966	0.0499102	leucine rich repeat containing 4	This gene is significantly downregulated in primary brain tumors. The exact function of the protein encoded by this gene is unknown. [provided by RefSeq, Jul 2008].

## Sheet: Table2
Differentially expressed genes between males and females in tumour (TCGA) and normal (GTEx) thyroid tissues
ensembl_ID: ensembl gene ID
gene_symbol: gene symbol
chrom: chromosome number
state: gender differential expression (GDE) state. common - GDE in tumour and normal tissues; tumour_specific - GDE only in tumour tissues; normal_specific - GDE only in normal tissues
log2FC_tumour: log2-fold change (log2FC) of expression between males and females in tumour tissues (edgeR reported). Genes with positive log2FC are over-expressed in males while genes with negative log2FC are over-expressed in females
FDR_tumour: p-value adjusted for multiple-testing using Benjamin-Hochberg procedure. The p-value was derived from a likelihood-ratio test (LRT) for the gender coefficient (male/female) of the linear model
log2FC_normal: log2-fold change (log2FC) of expression between males and females in normal tissues (edgeR reported). Genes with positive log2FC are over-expressed in males while genes with negative log2FC are over-expressed in females
FDR_normal: p-value adjusted for multiple-testing using Benjamin-Hochberg procedure. The p-value was derived from a likelihood-ratio test (LRT) for the gender coefficient (male/female) of the linear model
name: gene name
summary: functional gene summary
ensembl_ID	gene_symbol	chrom	state	log2FC_tumour	FDR_tumour	log2FC_normal	FDR_normal	name	summary
ENSG00000012817	KDM5D	chrY	common	11.3243	0	9.68222	0	lysine demethylase 5D	This gene encodes a protein containing zinc finger domains. A short peptide derived from this protein is a minor histocompatibility antigen which can lead to graft rejection of male donor cells in a female recipient. Alternative splicing results in multiple transcript variants. [provided by RefSeq, Apr 2009].
ENSG00000067048	DDX3Y	chrY	common	11.1959	0	9.49709	0	DEAD-box helicase 3 Y-linked	The protein encoded by this gene is a member of the DEAD-box RNA helicase family, characterized by nine conserved motifs, included the conserved Asp-Glu-Ala-Asp (DEAD) motif. These motifs are thought to be involved in ATP binding, hydrolysis, RNA binding, and in the formation of intramolecular interactions. This protein shares high similarity to DDX3X, on the X chromosome, but a deletion of this …
ENSG00000067646	ZFY	chrY	common	10.5767	0	9.78841	0	zinc finger protein Y-linked	This gene encodes a zinc finger-containing protein that may function as a transcription factor. This gene was once a candidate gene for the testis-determining factor (TDF) and was erroneously referred to as TDF. [provided by RefSeq, Jul 2008].
ENSG00000114374	USP9Y	chrY	common	11.1037	0	9.75424	0	ubiquitin specific peptidase 9 Y-linked	This gene is a member of the peptidase C19 family. It encodes a protein that is similar to ubiquitin-specific proteases, which cleave the ubiquitin moiety from ubiquitin-fused precursors and ubiquitinylated proteins. [provided by RefSeq, Mar 2009].
ENSG00000129824	RPS4Y1	chrY	common	11.679	0	9.3303	0	ribosomal protein S4 Y-linked 1	Cytoplasmic ribosomes, organelles that catalyze protein synthesis, consist of a small 40S subunit and a large 60S subunit. Together these subunits are composed of 4 RNA species and approximately 80 structurally distinct proteins. This gene encodes ribosomal protein S4, a component of the 40S subunit. Ribosomal protein S4 is the only ribosomal protein known to be encoded by more than one gene, nam…
ENSG00000165246	NLGN4Y	chrY	common	10.0896	0	7.56703	0	neuroligin 4 Y-linked	This gene encodes a type I membrane protein that belongs to the family of neuroligins, which are cell adhesion molecules present at the postsynaptic side of the synapse, and may be essential for the formation of functional synapses. Alternatively spliced transcript variants have been found for this gene.[provided by RefSeq, Mar 2011].
ENSG00000183878	UTY	chrY	common	11.0291	0	9.51975	0	ubiquitously transcribed tetratricopeptide repeat containing, Y-linked	This gene encodes a protein containing tetratricopeptide repeats which are thought to be involved in protein-protein interactions. The encoded protein is also a minor histocompatibility antigen which may induce graft rejection of male stem cell grafts. A large number of alternatively spliced transcripts have been observed for this gene, but the full length nature of some of these variants has not…
ENSG00000198692	EIF1AY	chrY	common	11.046	0	8.55384	0	eukaryotic translation initiation factor 1A Y-linked	This gene is located on the non-recombining region of the Y chromosome. It encodes a protein related to eukaryotic translation initiation factor 1A (EIF1A), which may function in stabilizing the binding of the initiator Met-tRNA to 40S ribosomal subunits. Alternative splicing results in multiple transcript variants. [provided by RefSeq, Jul 2013].
ENSG00000233864	TTTY15	chrY	common	9.94249	0	9.1486	0	NA	NA
ENSG00000229807	XIST	chrX	common	-9.06471	1.16003e-203	-10.2827	0	X inactive specific transcript	NA
ENSG00000126012	KDM5C	chrX	common	-0.560529	2.89823e-123	-0.533692	1.26078e-82	lysine demethylase 5C	This gene is a member of the SMCY homolog family and encodes a protein with one ARID domain, one JmjC domain, one JmjN domain and two PHD-type zinc fingers. The DNA-binding motifs suggest this protein is involved in the regulation of transcription and chromatin remodeling. Mutations in this gene have been associated with X-linked cognitive disability. Alternative splicing results in multiple tran…
ENSG00000173674	EIF1AX	chrX	common	-0.468202	3.4248e-73	-0.408778	3.61357e-44	eukaryotic translation initiation factor 1A X-linked	This gene encodes an essential eukaryotic translation initiation factor. The protein is required for the binding of the 43S complex (a 40S subunit, eIF2/GTP/Met-tRNAi and eIF3) to the 5' end of capped RNA. [provided by RefSeq, Jul 2008].
ENSG00000225470	JPX	chrX	common	-0.566345	2.81906e-64	-0.559918	1.98204e-71	JPX transcript, XIST activator	NA
ENSG00000005889	ZFX	chrX	common	-0.604435	4.01962e-63	-0.578057	8.11447e-76	zinc finger protein X-linked	This gene on the X chromosome is structurally similar to a related gene on the Y chromosome. It encodes a member of the krueppel C2H2-type zinc-finger protein family. The full-length protein contains an acidic transcriptional activation domain (AD), a nuclear localization sequence (NLS) and a DNA binding domain (DBD) consisting of 13 C2H2-type zinc fingers. Studies in mouse embryonic and adult he…
ENSG00000147050	KDM6A	chrX	common	-0.76098	3.93678e-61	-0.716061	4.34506e-205	lysine demethylase 6A	This gene is located on the X chromosome and is the corresponding locus to a Y-linked gene which encodes a tetratricopeptide repeat (TPR) protein. The encoded protein of this gene contains a JmjC-domain and catalyzes the demethylation of tri/dimethylated histone H3. Multiple alternatively spliced transcript variants have been found for this gene. [provided by RefSeq, Apr 2014].
ENSG00000130021	HDHD1	chrX	common	-0.593019	4.22787e-59	-0.485532	5.14751e-42	pseudouridine 5'-phosphatase	This gene encodes a member of the haloacid dehalogenase-like (HAD) hydrolase superfamily. The encoded protein has no known biological function. This gene has a pseudogene on chromosome 1. Multiple alternatively spliced transcript variants encoding different isoforms have been identified. [provided by RefSeq, Jul 2010].
ENSG00000006757	PNPLA4	chrX	common	-0.72577	1.24255e-57	-0.449514	5.6684e-27	patatin like phospholipase domain containing 4	This gene encodes a member of the patatin-like family of phospholipases. The encoded enzyme has both triacylglycerol lipase and transacylase activities and may be involved in adipocyte triglyceride homeostasis. Alternate splicing results in multiple transcript variants. A pseudogene of this gene is found on chromosome Y. [provided by RefSeq, Feb 2010].
ENSG00000006756	ARSD	chrX	common	-0.453361	5.47105e-45	-0.356474	1.33996e-18	arylsulfatase D	The protein encoded by this gene is a member of the sulfatase family. Sulfatases are essential for the correct composition of bone and cartilage matrix. The encoded protein is postranslationally glycosylated and localized to the lysosome. This gene is located within a cluster of similar arylsulfatase genes on chromosome X. A related pseudogene has been identified in the pseudoautosomal region of …
ENSG00000215301	DDX3X	chrX	common	-0.561832	3.86442e-43	-0.425961	1.16224e-38	DEAD-box helicase 3 X-linked	The protein encoded by this gene is a member of the large DEAD-box protein family, that is defined by the presence of the conserved Asp-Glu-Ala-Asp (DEAD) motif, and has ATP-dependent RNA helicase activity. This protein has been reported to display a high level of RNA-independent ATPase activity, and unlike most DEAD-box helicases, the ATPase activity is thought to be stimulated by both RNA and D…
ENSG00000169895	SYAP1	chrX	common	-0.329868	3.662e-34	-0.255179	3.5736e-17	synapse associated protein 1	NA
ENSG00000086712	TXLNG	chrX	common	-0.367262	2.0442e-23	-0.283308	2.91523e-08	taxilin gamma	This gene encodes a member of the taxilin family. The encoded protein binds to the C-terminal coiled-coil region of syntaxin family members 1A, 3A and 4A, and may play a role in intracellular vesicle trafficking. This gene is up-regulated by lipopolysaccharide and the gene product may be involved in cell cycle regulation. The related mouse protein was also shown to inhibit activating transcriptio…
ENSG00000002586	CD99	chrX	common	0.609601	3.44976e-22	0.400172	2.60871e-18	CD99 molecule (Xg blood group)	The protein encoded by this gene is a cell surface glycoprotein involved in leukocyte migration, T-cell adhesion, ganglioside GM1 and transmembrane protein transport, and T-cell death by a caspase-independent pathway. In addition, the encoded protein may have the ability to rearrange the actin cytoskeleton and may also act as an oncosuppressor in osteosarcoma. This gene is found in the pseudoauto…
ENSG00000072501	SMC1A	chrX	common	-0.412966	5.13017e-21	-0.26726	3.87123e-25	structural maintenance of chromosomes 1A	Proper cohesion of sister chromatids is a prerequisite for the correct segregation of chromosomes during cell division. The cohesin multiprotein complex is required for sister chromatid cohesion. This complex is composed partly of two structural maintenance of chromosomes (SMC) proteins, SMC3 and either SMC1B or the protein encoded by this gene. Most of the cohesin complexes dissociate from the c…
ENSG00000196459	TRAPPC2	chrX	common	-0.300123	5.13017e-21	-0.3125	1.26906e-23	trafficking protein particle complex 2	The protein encoded by this gene is thought to be part of a large multi-subunit complex involved in the targeting and fusion of endoplasmic reticulum-to-Golgi transport vesicles with their acceptor compartment. In addition, the encoded protein can bind c-myc promoter-binding protein 1 and block its transcriptional repression capability. Mutations in this gene are a cause of spondyloepiphyseal dys…
ENSG00000130741	EIF2S3	chrX	common	-0.32145	1.68002e-16	-0.35955	8.45688e-27	eukaryotic translation initiation factor 2 subunit gamma	The protein encoded by this gene is the largest subunit of a heterotrimeric GTP-binding protein involved in the recruitment of methionyl-tRNA(i) to the 40 S ribosomal subunit. [provided by RefSeq, Jan 2010].
ENSG00000169249	ZRSR2	chrX	common	-0.335634	1.75907e-13	-0.525108	3.23165e-48	zinc finger CCCH-type, RNA binding motif and serine/arginine rich 2	This gene encodes an essential splicing factor. The encoded protein associates with the U2 auxiliary factor heterodimer, which is required for the recognition of a functional 3' splice site in pre-mRNA splicing, and may play a role in network interactions during spliceosome assembly. [provided by RefSeq, Jul 2008].
ENSG00000101846	STS	chrX	common	-0.377808	8.07988e-13	-0.342954	2.01724e-12	steroid sulfatase	This gene encodes a multi-pass membrane protein that is localized to the endoplasmic reticulum. It belongs to the sulfatase family and hydrolyzes several 3-beta-hydroxysteroid sulfates, which serve as metabolic precursors for estrogens, androgens, and cholesterol. Mutations in this gene are associated with X-linked ichthyosis (XLI). Alternatively spliced transcript variants resulting from the use…
ENSG00000046651	OFD1	chrX	common	-0.263062	1.53911e-12	-0.351355	3.28756e-12	OFD1 centriole and centriolar satellite protein	This gene is located on the X chromosome and encodes a centrosomal protein. A knockout mouse model has been used to study the effect of mutations in this gene. The mouse gene is also located on the X chromosome, however, unlike the human gene it is not subject to X inactivation. Mutations in this gene are associated with oral-facial-digital syndrome type I and Simpson-Golabi-Behmel syndrome type …
ENSG00000198034	RPS4X	chrX	common	-0.426339	3.02618e-12	-0.507318	5.73566e-53	ribosomal protein S4 X-linked	Cytoplasmic ribosomes, organelles that catalyze protein synthesis, consist of a small 40S subunit and a large 60S subunit. Together these subunits are composed of 4 RNA species and approximately 80 structurally distinct proteins. This gene encodes ribosomal protein S4, a component of the 40S subunit. Ribosomal protein S4 is the only ribosomal protein known to be encoded by more than one gene, nam…
ENSG00000069509	FUNDC1	chrX	common	-0.225642	3.23468e-09	-0.122827	0.00119866	FUN14 domain containing 1	This gene encodes a protein with a FUN14 superfamily domain. The function of the encoded protein is not known. [provided by RefSeq, Sep 2011].
ENSG00000046647	GEMIN8	chrX	common	-0.244173	7.78775e-09	-0.313813	2.55128e-20	gem nuclear organelle associated protein 8	The protein encoded by this gene is part of the SMN complex, which is necessary for spliceosomal snRNP assembly in the cytoplasm and pre-mRNA splicing in the nucleus. The encoded protein binds to both SMN1 and the GEMIN6/GEMIN7 heterodimer, mediating their interaction. This protein is found in nuclear Gemini of Cajal bodies (gems) and in the cytoplasm. Three transcript variants encoding the same …
ENSG00000004799	PDK4	chr7	tumour_specific	-0.994475	3.07882e-07	NA	NA	pyruvate dehydrogenase kinase 4	This gene is a member of the PDK/BCKDK protein kinase family and encodes a mitochondrial protein with a histidine kinase domain. This protein is located in the matrix of the mitrochondria and inhibits the pyruvate dehydrogenase complex by phosphorylating one of its subunits, thereby contributing to the regulation of glucose metabolism. Expression of this gene is regulated by glucocorticoids, reti…
ENSG00000131400	NAPSA	chr19	tumour_specific	1.29071	1.29791e-06	NA	NA	napsin A aspartic peptidase	This gene encodes a member of the peptidase A1 family of aspartic proteases. The encoded preproprotein is proteolytically processed to generate an activation peptide and the mature protease. The activation peptides of aspartic proteinases function as inhibitors of the protease active site. These peptide segments, or pro-parts, are deemed important for correct folding, targeting, and control of th…
ENSG00000169239	CA5B	chrX	common	-0.2633	1.04785e-05	-0.237643	8.31228e-05	carbonic anhydrase 5B	Carbonic anhydrases (CAs) are a large family of zinc metalloenzymes that catalyze the reversible hydration of carbon dioxide. They participate in a variety of biological processes, including respiration, calcification, acid-base balance, bone resorption, and the formation of aqueous humor, cerebrospinal fluid, saliva, and gastric acid. They show extensive diversity in tissue distribution and in t…
ENSG00000214717	ZBED1	chrX	common	0.169911	3.03725e-05	0.236839	1.71114e-14	zinc finger BED-type containing 1	This gene is located in the pseudoautosomal region 1 (PAR1) of X and Y chromosomes. It was earlier identified as a gene with similarity to Ac transposable elements, however, was found not to have transposase activity. Later studies show that this gene product is localized in the nucleus and functions as a transcription factor. It binds to DNA elements found in the promoter regions of several gene…
ENSG00000124486	USP9X	chrX	common	-0.176042	8.9324e-05	-0.123412	4.5391e-05	ubiquitin specific peptidase 9 X-linked	This gene is a member of the peptidase C19 family and encodes a protein that is similar to ubiquitin-specific proteases. Though this gene is located on the X chromosome, it escapes X-inactivation. Mutations in this gene have been associated with Turner syndrome. Alternate transcriptional splice variants, encoding different isoforms, have been characterized. [provided by RefSeq, Jul 2008].
ENSG00000198734	F5	chr1	common	1.32148	9.2282e-05	-0.722285	0.00065065	coagulation factor V	This gene encodes an essential cofactor of the blood coagulation cascade. This factor circulates in plasma, and is converted to the active form by the release of the activation peptide by thrombin during coagulation. This generates a heavy chain and a light chain which are held together by calcium ions. The activated protein is a cofactor that participates with activated coagulation factor X to a…
ENSG00000185291	IL3RA	chrX	common	0.306473	0.000129689	0.329662	0.00119866	interleukin 3 receptor subunit alpha	The protein encoded by this gene is an interleukin 3 specific subunit of a heterodimeric cytokine receptor. The receptor is comprised of a ligand specific alpha subunit and a signal transducing beta subunit shared by the receptors for interleukin 3 (IL3), colony stimulating factor 2 (CSF2/GM-CSF), and interleukin 5 (IL5). The binding of this protein to IL3 depends on the beta subunit. The beta su…
ENSG00000072274	TFRC	chr3	tumour_specific	-0.367717	0.000135678	NA	NA	transferrin receptor	This gene encodes a cell surface receptor necessary for cellular iron uptake by the process of receptor-mediated endocytosis. This receptor is required for erythropoiesis and neurologic development. Multiple alternatively spliced variants have been identified. [provided by RefSeq, Sep 2015].
ENSG00000101901	ALG13	chrX	common	-0.183971	0.000146328	-0.215609	1.277e-11	ALG13 UDP-N-acetylglucosaminyltransferase subunit	The protein encoded by this gene is a subunit of a bipartite UDP-N-acetylglucosamine transferase. It heterodimerizes with asparagine-linked glycosylation 14 homolog to form a functional UDP-GlcNAc glycosyltransferase that catalyzes the second sugar addition of the highly conserved oligosaccharide precursor in endoplasmic reticulum N-linked glycosylation. Multiple transcript variants encoding diff…
ENSG00000130985	UBA1	chrX	tumour_specific	-0.124736	0.000147616	NA	NA	ubiquitin like modifier activating enzyme 1	The protein encoded by this gene catalyzes the first step in ubiquitin conjugation to mark cellular proteins for degradation. This gene complements an X-linked mouse temperature-sensitive defect in DNA synthesis, and thus may function in DNA repair. It is part of a gene cluster on chromosome Xp11.23. Alternatively spliced transcript variants that encode the same protein have been described. [prov…
ENSG00000142102	ATHL1	chr11	tumour_specific	0.744703	0.000152522	NA	NA	protein-glucosylgalactosylhydroxylysine glucosidase	NA
ENSG00000205664	RP11-706O15.1	chrX	common	-0.267222	0.00032571	-0.437599	9.40364e-26	NA	NA
ENSG00000182378	PLCXD1	chrX	tumour_specific	0.305917	0.00037002	NA	NA	phosphatidylinositol specific phospholipase C X domain containing 1	This gene is the most terminal protein-coding gene in the pseudoautosomal (PAR) region on chromosomes X and Y. Alternate splicing results in multiple transcript variants. [provided by RefSeq, Mar 2010].
ENSG00000173638	SLC19A1	chr21	tumour_specific	0.526691	0.000430894	NA	NA	solute carrier family 19 member 1	The membrane protein encoded by this gene is a transporter of folate and is involved in the regulation of intracellular concentrations of folate. Three transcript variants encoding different isoforms have been found for this gene.[provided by RefSeq, Mar 2011].
ENSG00000197124	ZNF682	chr19	tumour_specific	0.379364	0.000430894	NA	NA	zinc finger protein 682	NA
ENSG00000188419	CHM	chrX	tumour_specific	-0.247791	0.000499369	NA	NA	CHM Rab escort protein	This gene encodes component A of the RAB geranylgeranyl transferase holoenzyme. In the dimeric holoenzyme, this subunit binds unprenylated Rab GTPases and then presents them to the catalytic Rab GGTase subunit for the geranylgeranyl transfer reaction. Rab GTPases need to be geranylgeranyled on either one or two cysteine residues in their C-terminus to localize to the correct intracellular membran…
ENSG00000156265	MAP3K7CL	chr21	tumour_specific	0.331543	0.000512986	NA	NA	MAP3K7 C-terminal like	NA
ENSG00000181666	HKR1	chr19	tumour_specific	0.130822	0.00101979	NA	NA	zinc finger protein 875	NA
ENSG00000226742	HSBP1L1	chr18	tumour_specific	0.251049	0.00176332	NA	NA	heat shock factor binding protein 1 like 1	NA
ENSG00000106477	CEP41	chr7	tumour_specific	-0.14208	0.00183025	NA	NA	centrosomal protein 41	This gene encodes a centrosomal and microtubule-binding protein which is predicted to have two coiled-coil domains and a rhodanese domain. In human retinal pigment epithelial cells the protein localized to centrioles and cilia. Mutations in this gene have been associated with Joubert Syndrome 15; an autosomal recessive ciliopathy and neurological disorder. Alternative splicing results in multiple…
ENSG00000170801	HTRA3	chr4	tumour_specific	0.699247	0.00272885	NA	NA	HtrA serine peptidase 3	NA
ENSG00000267680	ZNF224	chr19	tumour_specific	0.182788	0.00376407	NA	NA	zinc finger protein 224	This gene encodes a member of the Krueppel C2H2-type zinc-finger family of proteins. The encoded protein represses transcription of the aldolase A gene, which encodes a key enzyme in glycolysis. The encoded zinc-finger protein may also function as a transcriptional co-activator with Wilms' tumor protein 1 to regulate apoptotic genes in leukemia. [provided by RefSeq, Jul 2016].
ENSG00000127084	FGD3	chr9	common	0.441936	0.00414772	-0.359674	0.000973178	FYVE, RhoGEF and PH domain containing 3	NA
ENSG00000175445	LPL	chr8	tumour_specific	0.586426	0.00450407	NA	NA	lipoprotein lipase	LPL encodes lipoprotein lipase, which is expressed in heart, muscle, and adipose tissue. LPL functions as a homodimer, and has the dual functions of triglyceride hydrolase and ligand/bridging factor for receptor-mediated lipoprotein uptake. Severe mutations that cause LPL deficiency result in type I hyperlipoproteinemia, while less extreme mutations in LPL are linked to many disorders of lipoprot…
ENSG00000211448	DIO2	chr14	tumour_specific	-0.549927	0.00554103	NA	NA	iodothyronine deiodinase 2	The protein encoded by this gene belongs to the iodothyronine deiodinase family. It catalyzes the conversion of prohormone thyroxine (3,5,3',5'-tetraiodothyronine, T4) to the bioactive thyroid hormone (3,5,3'-triiodothyronine, T3) by outer ring 5'-deiodination. This gene is widely expressed, including in thyroid and brain. It is thought to be responsible for the 'local' production of T3, and thus…
ENSG00000107551	RASSF4	chr10	tumour_specific	0.303296	0.00594111	NA	NA	Ras association domain family member 4	The function of this gene has not yet been determined but may involve a role in tumor suppression. Alternative splicing of this gene results in several transcript variants; however, most of the variants have not been fully described. [provided by RefSeq, Jul 2008].
ENSG00000204385	SLC44A4	chr6	common	0.836478	0.00670547	0.513553	0.000116078	solute carrier family 44 member 4	The protein encoded by this gene may be a sodium-dependent transmembrane transport protein involved in the uptake of choline by cholinergic neurons. Defects in this gene can cause sialidosis, a lysosomal storage disease. Three transcript variants encoding different isoforms have been found for this gene. [provided by RefSeq, May 2010].
ENSG00000196139	AKR1C3	chr10	tumour_specific	0.549987	0.0069256	NA	NA	aldo-keto reductase family 1 member C3	This gene encodes a member of the aldo/keto reductase superfamily, which consists of more than 40 known enzymes and proteins. These enzymes catalyze the conversion of aldehydes and ketones to their corresponding alcohols by utilizing NADH and/or NADPH as cofactors. The enzymes display overlapping but distinct substrate specificity. This enzyme catalyzes the reduction of prostaglandin (PG) D2, PGH…
ENSG00000132170	PPARG	chr3	tumour_specific	0.552225	0.00704171	NA	NA	peroxisome proliferator activated receptor gamma	This gene encodes a member of the peroxisome proliferator-activated receptor (PPAR) subfamily of nuclear receptors. PPARs form heterodimers with retinoid X receptors (RXRs) and these heterodimers regulate transcription of various genes. Three subtypes of PPARs are known: PPAR-alpha, PPAR-delta, and PPAR-gamma. The protein encoded by this gene is PPAR-gamma and is a regulator of adipocyte differen…
ENSG00000122877	EGR2	chr10	tumour_specific	-0.633016	0.0104957	NA	NA	early growth response 2	The protein encoded by this gene is a transcription factor with three tandem C2H2-type zinc fingers. Defects in this gene are associated with Charcot-Marie-Tooth disease type 1D (CMT1D), Charcot-Marie-Tooth disease type 4E (CMT4E), and with Dejerine-Sottas syndrome (DSS). Multiple transcript variants encoding two different isoforms have been found for this gene. [provided by RefSeq, Oct 2008].
ENSG00000155304	HSPA13	chr21	tumour_specific	-0.209119	0.0106242	NA	NA	heat shock protein family A (Hsp70) member 13	The protein encoded by this gene is a member of the heat shock protein 70 family and is found associated with microsomes. Members of this protein family play a role in the processing of cytosolic and secretory proteins, as well as in the removal of denatured or incorrectly-folded proteins. The encoded protein contains an ATPase domain and has been shown to associate with a ubiquitin-like protein.…
ENSG00000169093	ASMTL	chrX	common	0.145997	0.0110518	0.142287	0.00119866	acetylserotonin O-methyltransferase like	The protein encoded by this gene has an N-terminus that is similar to the multicopy associated filamentation (maf) protein of Bacillus subtilis and to orfE of Escherichia coli, while the C-terminus is similar to N-acetylserotonin O-methyltransferase. This gene is located in the pseudoautosomal region 1 (PAR1) of X and Y chromosomes. Three transcript variants encoding different isoforms have been …
ENSG00000163017	ACTG2	chr2	tumour_specific	0.622999	0.0112985	NA	NA	actin gamma 2, smooth muscle	Actins are highly conserved proteins that are involved in various types of cell motility and in the maintenance of the cytoskeleton. Three types of actins, alpha, beta and gamma, have been identified in vertebrates. Alpha actins are found in muscle tissues and are a major constituent of the contractile apparatus. The beta and gamma actins co-exist in most cell types as components of the cytoskele…
ENSG00000188536	HBA2	chr16	tumour_specific	0.65018	0.0121505	NA	NA	hemoglobin subunit alpha 2	The human alpha globin gene cluster located on chromosome 16 spans about 30 kb and includes seven loci: 5'- zeta - pseudozeta - mu - pseudoalpha-1 - alpha-2 - alpha-1 - theta - 3'. The alpha-2 (HBA2) and alpha-1 (HBA1) coding sequences are identical. These genes differ slightly over the 5' untranslated regions and the introns, but they differ significantly over the 3' untranslated regions. Two al…
ENSG00000103888	CEMIP	chr15	tumour_specific	0.651109	0.0141573	NA	NA	cell migration inducing hyaluronidase 1	NA
ENSG00000160097	FNDC5	chr1	tumour_specific	0.51034	0.0141573	NA	NA	fibronectin type III domain containing 5	This gene encodes a secreted protein that is released from muscle cells during exercise. The encoded protein may participate in the development of brown fat. Translation of the precursor protein initiates at a non-AUG start codon at a position that is conserved as an AUG start codon in other organisms. Alternative splicing results in multiple transcript variants. [provided by RefSeq, Jun 2013].
ENSG00000140398	NEIL1	chr15	tumour_specific	0.251178	0.0144184	NA	NA	nei like DNA glycosylase 1	This gene is a member of the Nei endonuclease VIII-like gene family which encodes DNA glycosylases. The encoded enzyme participates in the DNA repair pathway by initiating base excision repair by removing damaged bases, primarily oxidized pyrimidines. Multiple transcript variants encoding different isoforms have been found for this gene. [provided by RefSeq, Feb 2012].
ENSG00000110090	CPT1A	chr11	tumour_specific	-0.209405	0.0146155	NA	NA	carnitine palmitoyltransferase 1A	The mitochondrial oxidation of long-chain fatty acids is initiated by the sequential action of carnitine palmitoyltransferase I (which is located in the outer membrane and is detergent-labile) and carnitine palmitoyltransferase II (which is located in the inner membrane and is detergent-stable), together with a carnitine-acylcarnitine translocase. CPT I is the key enzyme in the carnitine-dependen…
ENSG00000185442	FAM174B	chr15	tumour_specific	0.218068	0.0158809	NA	NA	family with sequence similarity 174 member B	NA
ENSG00000181481	RNF135	chr17	tumour_specific	0.137435	0.0160438	NA	NA	ring finger protein 135	The protein encoded by this gene contains a RING finger domain, a motif present in a variety of functionally distinct proteins and known to be involved in protein-protein and protein-DNA interactions. This gene is located in a chromosomal region known to be frequently deleted in patients with neurofibromatosis. Alternatively spliced transcript variants encoding distinct isoforms have been reporte…
ENSG00000187134	AKR1C1	chr10	tumour_specific	0.662407	0.0160438	NA	NA	aldo-keto reductase family 1 member C1	This gene encodes a member of the aldo/keto reductase superfamily, which consists of more than 40 known enzymes and proteins. These enzymes catalyze the conversion of aldehydes and ketones to their corresponding alcohols by utilizing NADH and/or NADPH as cofactors. The enzymes display overlapping but distinct substrate specificity. This enzyme catalyzes the reaction of progesterone to the inactiv…
ENSG00000165417	GTF2A1	chr14	common	-0.177277	0.0180052	0.210177	0.00119866	general transcription factor IIA subunit 1	Accurate transcription initiation on TATA-containing class II genes involves the ordered assembly of RNA polymerase II (POLR2A; MIM 180660) and several general initiation factors (summarized by DeJong and Roeder, 1993 [PubMed 8224848]). One of these factors is TFIIA, which when purified from HeLa extracts consists of 35-, 19-, and 12-kD subunits.[supplied by OMIM, Jul 2010].
ENSG00000168818	STX18	chr4	tumour_specific	0.0936891	0.0187274	NA	NA	syntaxin 18	This gene encodes a member of the syntaxin family of soluble N-ethylmaleimide-sensitive factor attachment protein receptors (SNAREs) which is part of a membrane tethering complex that includes other SNAREs and several peripheral membrane proteins, and is involved in vesicular transport between the endoplasmic reticulum (ER) and the Golgi complex. The encoded protein is important for the organizat…
ENSG00000169084	DHRSX	chrX	common	0.142358	0.0187274	0.18398	1.59641e-05	dehydrogenase/reductase X-linked	NA
ENSG00000139514	SLC7A1	chr13	tumour_specific	-0.353795	0.019441	NA	NA	solute carrier family 7 member 1	NA
ENSG00000182685	BRICD5	chr16	tumour_specific	0.327755	0.0201326	NA	NA	BRICHOS domain containing 5	NA
ENSG00000136379	ABHD17C	chr15	tumour_specific	0.260649	0.0208469	NA	NA	abhydrolase domain containing 17C, depalmitoylase	NA
ENSG00000198948	MFAP3L	chr4	tumour_specific	0.466936	0.0209043	NA	NA	microfibril associated protein 3 like	NA
ENSG00000177508	IRX3	chr16	tumour_specific	0.475823	0.0218845	NA	NA	iroquois homeobox 3	IRX3 is a member of the Iroquois homeobox gene family (see IRX1; MIM 606197) and plays a role in an early step of neural development (Bellefroid et al., 1998 [PubMed 9427753]). Members of this family appear to play multiple roles during pattern formation of vertebrate embryos (Lewis et al., 1999 [PubMed 10370142]).[supplied by OMIM, Aug 2009].
ENSG00000100100	PIK3IP1	chr22	tumour_specific	0.19683	0.0223971	NA	NA	phosphoinositide-3-kinase interacting protein 1	NA
ENSG00000226479	TMEM185B	chr2	common	-0.126765	0.022692	0.142174	0.00458698	transmembrane protein 185B	NA
ENSG00000117155	SSX2IP	chr1	tumour_specific	-0.16016	0.0229383	NA	NA	SSX family member 2 interacting protein	This gene encodes a protein that binds the cancer-testis antigen Synovial Sarcoma X breakpoint 2 protein. The encoded protein may regulate the activity of Synovial Sarcoma X breakpoint 2 protein in malignant cells. Alternate splicing results in multiple transcript variants. A pseudogene of this gene is found on chromosome 3. [provided by RefSeq, Oct 2009].
ENSG00000152315	KCNK13	chr14	tumour_specific	-0.44268	0.0229383	NA	NA	potassium two pore domain channel subfamily K member 13	Potassium channels represent the most complex class of voltage-gated ion channels from both functional and structural standpoints. Their diverse functions include regulating neurotransmitter release, heart rate, insulin secretion, neuronal excitability, epithelial electrolyte transport, smooth muscle contraction, and cell volume. This gene encodes a potassium channel containing two pore-forming d…
ENSG00000138794	CASP6	chr4	tumour_specific	0.155686	0.025358	NA	NA	caspase 6	This gene encodes a member of the cysteine-aspartic acid protease (caspase) family of enzymes. Sequential activation of caspases plays a central role in the execution-phase of cell apoptosis. Caspases exist as inactive proenzymes which undergo proteolytic processing at conserved aspartic acid residues to produce two subunits, large and small, that dimerize to form the active enzyme. This protein …
ENSG00000104973	MED25	chr19	tumour_specific	0.151252	0.0255495	NA	NA	mediator complex subunit 25	This gene encodes a component of the transcriptional coactivator complex termed the Mediator complex. This complex is required for transcription of most RNA polymerase II-dependent genes. The encoded protein plays a role in chromatin modification and in preinitiation complex assembly. Mutations in this gene are associated with Charcot-Marie-Tooth disease type 2B2. [provided by RefSeq, Apr 2010].
ENSG00000116990	MYCL	chr1	common	0.470063	0.0267031	-0.395094	0.00421245	MYCL proto-oncogene, bHLH transcription factor	NA
ENSG00000137411	VARS2	chr6	tumour_specific	0.156385	0.0267031	NA	NA	valyl-tRNA synthetase 2, mitochondrial	This gene encodes a mitochondrial aminoacyl-tRNA synthetase, which catalyzes the attachment of valine to tRNA(Val) for mitochondrial translation. Mutations in this gene cause combined oxidative phosphorylation deficiency-20, and are also associated with early-onset mitochondrial encephalopathies. Alternative splicing of this gene results in multiple transcript variants. [provided by RefSeq, Aug 2…
ENSG00000158863	FAM160B2	chr8	tumour_specific	0.104237	0.0267031	NA	NA	family with sequence similarity 160 member B2	NA
ENSG00000154813	DPH3	chr3	tumour_specific	-0.108029	0.0279704	NA	NA	diphthamide biosynthesis 3	This gene encodes a CSL zinc finger-containing protein that is required for dipthamide biosynthesis. The encoded protein is necessary for the initial step in the modification of a histidine residue in elongation factor-2 to diphthamide. This modified residue is a target for ADP ribosylation by the bacterial toxins diphtheria toxin and Pseudomonas exotoxin A. Alternative splicing results in multip…
ENSG00000167393	PPP2R3B	chrX	tumour_specific	0.210231	0.0279704	NA	NA	protein phosphatase 2 regulatory subunit B''beta	Protein phosphatase 2 (formerly named type 2A) is one of the four major Ser/Thr phosphatases and is implicated in the negative control of cell growth and division. Protein phosphatase 2 holoenzymes are heterotrimeric proteins composed of a structural subunit A, a catalytic subunit C, and a regulatory subunit B. The regulatory subunit is encoded by a diverse set of genes that have been grouped int…
ENSG00000161904	LEMD2	chr6	tumour_specific	0.0889172	0.0287114	NA	NA	LEM domain nuclear envelope protein 2	This gene encodes a LEM domain-containing transmembrane protein of the inner nuclear membrane. The protein is involved in nuclear structure organization and plays a role in cell signaling and differentiation. Mutations in this gene result in Cataract 46, juvenile-onset. Multiple transcript variants have been found for this gene. [provided by RefSeq, Feb 2017].
ENSG00000204764	RANBP17	chr5	tumour_specific	0.416977	0.0310514	NA	NA	RAN binding protein 17	The transport of protein and large RNAs through the nuclear pore complexes (NPC) is an energy-dependent and regulated process. The import of proteins with a nuclear localization signal (NLS) is accomplished by recognition of one or more clusters of basic amino acids by the importin-alpha/beta complex; see MIM 600685 and MIM 602738. The small GTPase RAN (MIM 601179) plays a key role in NLS-depende…
ENSG00000067606	PRKCZ	chr1	tumour_specific	0.235085	0.0312134	NA	NA	protein kinase C zeta	Protein kinase C (PKC) zeta is a member of the PKC family of serine/threonine kinases which are involved in a variety of cellular processes such as proliferation, differentiation and secretion. Unlike the classical PKC isoenzymes which are calcium-dependent, PKC zeta exhibits a kinase activity which is independent of calcium and diacylglycerol but not of phosphatidylserine. Furthermore, it is ins…
ENSG00000064300	NGFR	chr17	tumour_specific	-0.669283	0.0326543	NA	NA	nerve growth factor receptor	Nerve growth factor receptor contains an extracellular domain containing four 40-amino acid repeats with 6 cysteine residues at conserved positions followed by a serine/threonine-rich region, a single transmembrane domain, and a 155-amino acid cytoplasmic domain. The cysteine-rich region contains the nerve growth factor binding domain. [provided by RefSeq, Jul 2008].
ENSG00000134899	ERCC5	chr13	tumour_specific	0.164437	0.0343268	NA	NA	ERCC excision repair 5, endonuclease	This gene encodes a single-strand specific DNA endonuclease that makes the 3' incision in DNA excision repair following UV-induced damage. The protein may also function in other cellular processes, including RNA polymerase II transcription, and transcription-coupled DNA repair. Mutations in this gene cause xeroderma pigmentosum complementation group G (XP-G), which is also referred to as xeroderm…
ENSG00000125846	ZNF133	chr20	tumour_specific	0.13854	0.0355107	NA	NA	zinc finger protein 133	NA
ENSG00000092621	PHGDH	chr1	tumour_specific	-0.361776	0.0360618	NA	NA	phosphoglycerate dehydrogenase	This gene encodes the enzyme which is involved in the early steps of L-serine synthesis in animal cells. L-serine is required for D-serine and other amino acid synthesis. The enzyme requires NAD/NADH as a cofactor and forms homotetramers for activity. Mutations in this gene have been found in a family with congenital microcephaly, psychomotor retardation and other symptoms. Multiple alternatively…
ENSG00000167968	DNASE1L2	chr16	tumour_specific	0.50299	0.0361357	NA	NA	deoxyribonuclease 1 like 2	NA
ENSG00000147789	ZNF7	chr8	tumour_specific	0.094146	0.0371043	NA	NA	zinc finger protein 7	NA
ENSG00000169598	DFFB	chr1	tumour_specific	0.12936	0.0371043	NA	NA	DNA fragmentation factor subunit beta	Apoptosis is a cell death process that removes toxic and/or useless cells during mammalian development. The apoptotic process is accompanied by shrinkage and fragmentation of the cells and nuclei and degradation of the chromosomal DNA into nucleosomal units. DNA fragmentation factor (DFF) is a heterodimeric protein of 40-kD (DFFB) and 45-kD (DFFA) subunits. DFFA is the substrate for caspase-3 and…
ENSG00000178038	ALS2CL	chr3	tumour_specific	0.250073	0.0383343	NA	NA	ALS2 C-terminal like	NA
ENSG00000034693	PEX3	chr6	tumour_specific	-0.129961	0.0395674	NA	NA	peroxisomal biogenesis factor 3	The product of this gene is involved in peroxisome biosynthesis and integrity. It assembles membrane vesicles before the matrix proteins are translocated. Peroxins (PEXs) are proteins that are essential for the assembly of functional peroxisomes. The peroxisome biogenesis disorders (PBDs) are a group of genetically heterogeneous autosomal recessive, lethal diseases characterized by multiple defec…
ENSG00000113448	PDE4D	chr5	tumour_specific	-0.360431	0.0401096	NA	NA	phosphodiesterase 4D	This gene encodes one of four mammalian counterparts to the fruit fly 'dunce' gene. The encoded protein has 3',5'-cyclic-AMP phosphodiesterase activity and degrades cAMP, which acts as a signal transduction molecule in multiple cell types. This gene uses different promoters to generate multiple alternatively spliced transcript variants that encode functional proteins.[provided by RefSeq, Sep 2009…
ENSG00000115425	PECR	chr2	tumour_specific	0.273962	0.0401096	NA	NA	peroxisomal trans-2-enoyl-CoA reductase	NA
ENSG00000147475	ERLIN2	chr8	tumour_specific	-0.120135	0.0401096	NA	NA	ER lipid raft associated 2	This gene encodes a member of the SPFH domain-containing family of lipid raft-associated proteins. The encoded protein is localized to lipid rafts of the endoplasmic reticulum and plays a critical role in inositol 1,4,5-trisphosphate (IP3) signaling by mediating ER-associated degradation of activated IP3 receptors. Mutations in this gene are a cause of spastic paraplegia-18 (SPG18). Alternatively…
ENSG00000185033	SEMA4B	chr15	tumour_specific	0.156549	0.0401096	NA	NA	semaphorin 4B	NA
ENSG00000198624	CCDC69	chr5	tumour_specific	0.382289	0.0401096	NA	NA	coiled-coil domain containing 69	NA
ENSG00000219481	NBPF1	chr1	tumour_specific	-0.182802	0.0401096	NA	NA	NBPF member 1	This gene is a member of the neuroblastoma breakpoint family (NBPF) which consists of dozens of recently duplicated genes primarily located in segmental duplications on human chromosome 1. This gene family has experienced its greatest expansion within the human lineage and has expanded, to a lesser extent, among primates in general. Members of this gene family are characterized by tandemly repeat…
ENSG00000167549	CORO6	chr17	tumour_specific	0.593199	0.0404669	NA	NA	coronin 6	NA
ENSG00000172005	MAL	chr2	tumour_specific	0.39936	0.0443269	NA	NA	mal, T cell differentiation protein	The protein encoded by this gene is a highly hydrophobic integral membrane protein belonging to the MAL family of proteolipids. The protein has been localized to the endoplasmic reticulum of T-cells and is a candidate linker protein in T-cell signal transduction. In addition, this proteolipid is localized in compact myelin of cells in the nervous system and has been implicated in myelin biogenesi…
ENSG00000123091	RNF11	chr1	tumour_specific	-0.109451	0.0446064	NA	NA	ring finger protein 11	The protein encoded by this gene contains a RING-H2 finger motif, which is known to be important for protein-protein interactions. The expression of this gene has been shown to be induced by mutant RET proteins (MEN2A/MEN2B). The germline mutations in RET gene are known to be responsible for the development of multiple endocrine neoplasia (MEN). [provided by RefSeq, Jul 2008].
ENSG00000128590	DNAJB9	chr7	tumour_specific	-0.203885	0.0446064	NA	NA	DnaJ heat shock protein family (Hsp40) member B9	This gene is a member of the J protein family. J proteins function in many cellular processes by regulating the ATPase activity of 70 kDa heat shock proteins. This gene is a member of the type 2 subgroup of DnaJ proteins. The encoded protein is localized to the endoplasmic reticulum. This protein is induced by endoplasmic reticulum stress and plays a role in protecting stressed cells from apoptos…
ENSG00000213398	LCAT	chr16	tumour_specific	0.285308	0.0446064	NA	NA	lecithin-cholesterol acyltransferase	This gene encodes the extracellular cholesterol esterifying enzyme, lecithin-cholesterol acyltransferase. The esterification of cholesterol is required for cholesterol transport. Mutations in this gene have been found to cause fish-eye disease as well as LCAT deficiency. [provided by RefSeq, Jul 2008].
ENSG00000198730	CTR9	chr11	tumour_specific	-0.107274	0.0446898	NA	NA	CTR9 homolog, Paf1/RNA polymerase II complex component	The protein encoded by this gene is a component of the PAF1 complex, which associates with RNA polymerase II and functions in transcriptional regulation and elongation. This complex also plays a role in the modification of histones. [provided by RefSeq, Oct 2016].
ENSG00000138757	G3BP2	chr4	tumour_specific	-0.142414	0.0448354	NA	NA	G3BP stress granule assembly factor 2	NA
ENSG00000091879	ANGPT2	chr8	tumour_specific	0.342369	0.045194	NA	NA	angiopoietin 2	The protein encoded by this gene is an antagonist of angiopoietin 1 (Ang-1), and both (Ang-1 and Ang-2) are ligands for the endothelial tyrosine kinase receptor (Tie2). These two ligands affect angiogenesis during embryogenesis and tumorigenesis. The encoded protein disrupts the vascular remodeling ability of Ang-1 and may induce endothelial cell apoptosis. Three transcript variants encoding thre…
ENSG00000099330	OCEL1	chr19	tumour_specific	0.214066	0.045194	NA	NA	occludin/ELL domain containing 1	NA
ENSG00000133392	MYH11	chr16	tumour_specific	0.500543	0.045194	NA	NA	myosin heavy chain 11	The protein encoded by this gene is a smooth muscle myosin belonging to the myosin heavy chain family. The gene product is a subunit of a hexameric protein that consists of two heavy chain subunits and two pairs of non-identical light chain subunits. It functions as a major contractile protein, converting chemical energy into mechanical energy through the hydrolysis of ATP. The gene encoding a hu…
ENSG00000140474	ULK3	chr15	tumour_specific	0.158428	0.045194	NA	NA	unc-51 like kinase 3	NA
ENSG00000147118	ZNF182	chrX	tumour_specific	0.123972	0.045194	NA	NA	zinc finger protein 182	Zinc-finger proteins bind nucleic acids and play important roles in various cellular functions, including cell proliferation, differentiation, and apoptosis. This gene encodes a zinc finger protein, and belongs to the krueppel C2H2-type zinc-finger protein family. It may be involved in transcriptional regulation. Multiple alternatively spliced transcript variants encoding different isoforms have …
ENSG00000174652	ZNF266	chr19	tumour_specific	0.169556	0.045194	NA	NA	zinc finger protein 266	This gene encodes a protein containing many tandem zinc-finger motifs. Zinc fingers are protein or nucleic acid-binding domains, and may be involved in a variety of functions, including regulation of transcription. This gene is located in a cluster of similar genes encoding zinc finger proteins on chromosome 19. Alternative splicing results in multiple transcript variants for this gene. [provided…
ENSG00000181523	SGSH	chr17	tumour_specific	0.116914	0.045194	NA	NA	N-sulfoglucosamine sulfohydrolase	This gene encodes the enzyme sulfamidase; one of several enzymes involved in the lysosomal degradation of heparan sulfate. Mutations in this gene are associated with the lysosomal storage disease mucopolysaccaridosis IIIA, also known as Sanfilippo syndrome A, which results from impaired degradation of heparan sulfate. Transcripts of varying sizes have been reported but their biological validity h…
ENSG00000138413	IDH1	chr2	tumour_specific	0.1698	0.0453883	NA	NA	isocitrate dehydrogenase (NADP(+)) 1	Isocitrate dehydrogenases catalyze the oxidative decarboxylation of isocitrate to 2-oxoglutarate. These enzymes belong to two distinct subclasses, one of which utilizes NAD(+) as the electron acceptor and the other NADP(+). Five isocitrate dehydrogenases have been reported: three NAD(+)-dependent isocitrate dehydrogenases, which localize to the mitochondrial matrix, and two NADP(+)-dependent isoc…
ENSG00000162441	LZIC	chr1	tumour_specific	-0.104901	0.0458446	NA	NA	leucine zipper and CTNNBIP1 domain containing	NA
ENSG00000166197	NOLC1	chr10	common	-0.113699	0.0481313	0.153137	0.00428161	nucleolar and coiled-body phosphoprotein 1	NA
ENSG00000164142	FAM160A1	chr4	tumour_specific	-0.22653	0.0494184	NA	NA	family with sequence similarity 160 member A1	NA
ENSG00000197912	SPG7	chr16	tumour_specific	0.126751	0.0494184	NA	NA	SPG7 matrix AAA peptidase subunit, paraplegin	This gene encodes a mitochondrial metalloprotease protein that is a member of the AAA family. Members of this protein family share an ATPase domain and have roles in diverse cellular processes including membrane trafficking, intracellular motility, organelle biogenesis, protein folding, and proteolysis. Mutations in this gene cause autosomal recessive spastic paraplegia 7. Two transcript variants…
ENSG00000183943	PRKX	chrX	normal_specific	NA	NA	-0.558985	1.28519e-13	protein kinase X-linked	This gene encodes a serine threonine protein kinase that has similarity to the catalytic subunit of cyclic AMP dependent protein kinases. The encoded protein is developmentally regulated and may be involved in renal epithelial morphogenesis. This protein may also be involved in macrophage and granulocyte maturation. Abnormal recombination between this gene and a related pseudogene on chromosome Y…
ENSG00000149531	FRG1B	chr20	normal_specific	NA	NA	0.376766	5.74856e-13	FSHD region gene 1 family member B, pseudogene	NA
ENSG00000184574	LPAR5	chr12	normal_specific	NA	NA	0.83965	5.85546e-10	lysophosphatidic acid receptor 5	This gene encodes a member of the rhodopsin class of G protein-coupled transmembrane receptors. This protein transmits extracellular signals from lysophosphatidic acid to cells through heterotrimeric G proteins and mediates numerous cellular processes. Many G protein receptors serve as targets for pharmaceutical drugs. Transcript variants of this gene have been described.[provided by RefSeq, Dec …
ENSG00000198780	FAM169A	chr5	normal_specific	NA	NA	0.283117	5.08318e-06	family with sequence similarity 169 member A	NA
ENSG00000116824	CD2	chr1	normal_specific	NA	NA	-0.656693	5.58646e-06	CD2 molecule	The protein encoded by this gene is a surface antigen found on all peripheral blood T-cells. The encoded protein interacts with LFA3 (CD58) on antigen presenting cells to optimize immune recognition. A locus control region (LCR) has been found in the 3' flanking sequence of this gene. [provided by RefSeq, Jun 2016].
ENSG00000140678	ITGAX	chr16	normal_specific	NA	NA	-0.655692	8.35127e-06	integrin subunit alpha X	This gene encodes the integrin alpha X chain protein. Integrins are heterodimeric integral membrane proteins composed of an alpha chain and a beta chain. This protein combines with the beta 2 chain (ITGB2) to form a leukocyte-specific integrin referred to as inactivated-C3b (iC3b) receptor 4 (CR4). The alpha X beta 2 complex seems to overlap the properties of the alpha M beta 2 integrin in the ad…
ENSG00000163964	PIGX	chr3	normal_specific	NA	NA	0.16015	9.44066e-06	phosphatidylinositol glycan anchor biosynthesis class X	This gene encodes a type I transmembrane protein in the endoplasmic reticulum (ER). The protein is an essential component of glycosylphosphatidylinositol-mannosyltransferase I, which transfers the first of the four mannoses in the GPI-anchor precursors during GPI-anchor biosynthesis. Studies in rat indicate that the protein is translated from a non-AUG translation initiation site. Alternative spl…
ENSG00000069424	KCNAB2	chr1	normal_specific	NA	NA	-0.355626	4.11796e-05	potassium voltage-gated channel subfamily A regulatory beta subunit 2	Voltage-gated potassium (Kv) channels represent the most complex class of voltage-gated ion channels from both functional and structural standpoints. Their diverse functions include regulating neurotransmitter release, heart rate, insulin secretion, neuronal excitability, epithelial electrolyte transport, smooth muscle contraction, and cell volume. Four sequence-related potassium channel genes - …
ENSG00000088992	TESC	chr12	normal_specific	NA	NA	0.414922	5.52871e-05	tescalcin	NA
ENSG00000141506	PIK3R5	chr17	normal_specific	NA	NA	-0.484259	7.18944e-05	phosphoinositide-3-kinase regulatory subunit 5	Phosphatidylinositol 3-kinases (PI3Ks) phosphorylate the inositol ring of phosphatidylinositol at the 3-prime position, and play important roles in cell growth, proliferation, differentiation, motility, survival and intracellular trafficking. The PI3Ks are divided into three classes: I, II and III, and only the class I PI3Ks are involved in oncogenesis. This gene encodes the 101 kD regulatory sub…
ENSG00000165633	VSTM4	chr10	normal_specific	NA	NA	0.356308	7.18944e-05	V-set and transmembrane domain containing 4	NA
ENSG00000171608	PIK3CD	chr1	normal_specific	NA	NA	-0.341362	8.31228e-05	phosphatidylinositol-4,5-bisphosphate 3-kinase catalytic subunit delta	Phosphoinositide 3-kinases (PI3Ks) phosphorylate inositol lipids and are involved in the immune response. The protein encoded by this gene is a class I PI3K found primarily in leukocytes. Like other class I PI3Ks (p110-alpha p110-beta, and p110-gamma), the encoded protein binds p85 adapter proteins and GTP-bound RAS. However, unlike the other class I PI3Ks, this protein phosphorylates itself, not…
ENSG00000116701	NCF2	chr1	normal_specific	NA	NA	-0.495783	0.000104806	neutrophil cytosolic factor 2	This gene encodes neutrophil cytosolic factor 2, the 67-kilodalton cytosolic subunit of the multi-protein NADPH oxidase complex found in neutrophils. This oxidase produces a burst of superoxide which is delivered to the lumen of the neutrophil phagosome. Mutations in this gene, as well as in other NADPH oxidase subunits, can result in chronic granulomatous disease, a disease that causes recurrent…
ENSG00000143110	C1orf162	chr1	normal_specific	NA	NA	-0.399931	0.000114654	chromosome 1 open reading frame 162	NA
ENSG00000101746	NOL4	chr18	normal_specific	NA	NA	0.358122	0.000116078	nucleolar protein 4	NA
ENSG00000074201	CLNS1A	chr11	normal_specific	NA	NA	0.130076	0.00011986	chloride nucleotide-sensitive channel 1A	This gene encodes a protein that functions in multiple regulatory pathways. The encoded protein complexes with numerous cytosolic proteins and performs diverse functions including regulation of small nuclear ribonucleoprotein biosynthesis, platelet activation and cytoskeletal organization. The protein is also found associated with the plasma membrane where it functions as a chloride current regul…
ENSG00000166501	PRKCB	chr16	normal_specific	NA	NA	-0.555993	0.000120291	protein kinase C beta	Protein kinase C (PKC) is a family of serine- and threonine-specific protein kinases that can be activated by calcium and second messenger diacylglycerol. PKC family members phosphorylate a wide variety of protein targets and are known to be involved in diverse cellular signaling pathways. PKC family members also serve as major receptors for phorbol esters, a class of tumor promoters. Each member…
ENSG00000160593	AMICA1	chr11	normal_specific	NA	NA	-0.534059	0.000140199	junction adhesion molecule like	NA
ENSG00000181467	RAP2B	chr3	normal_specific	NA	NA	-0.200569	0.000157898	RAP2B, member of RAS oncogene family	This intronless gene belongs to a family of RAS-related genes. The proteins encoded by these genes share approximately 50% amino acid identity with the classical RAS proteins and have numerous structural features in common. The most striking difference between the RAP and RAS proteins resides in their 61st amino acid: glutamine in RAS is replaced by threonine in RAP proteins. Evidence suggests th…
ENSG00000178752	FAM132B	chr2	normal_specific	NA	NA	0.743621	0.000163087	erythroferrone	NA
ENSG00000143512	HHIPL2	chr1	normal_specific	NA	NA	-0.756159	0.000180648	HHIP like 2	NA
ENSG00000064726	BTBD1	chr15	normal_specific	NA	NA	0.116508	0.000212711	BTB domain containing 1	The C-terminus of the protein encoded by this gene binds topoisomerase I. The N-terminus contains a proline-rich region and a BTB/POZ domain (broad-complex, Tramtrack and bric a brac/Pox virus and Zinc finger), both of which are typically involved in protein-protein interactions. Subcellularly, the protein localizes to cytoplasmic bodies. Alternative splicing results in multiple transcript varian…
ENSG00000066294	CD84	chr1	normal_specific	NA	NA	-0.625479	0.00025715	CD84 molecule	This gene encodes a membrane glycoprotein that is a member of the signaling lymphocyte activation molecule (SLAM) family. This family forms a subset of the larger CD2 cell-surface receptor Ig superfamily. The encoded protein is a homophilic adhesion molecule that is expressed in numerous immune cells types and is involved in regulating receptor-mediated signaling in those cells. Alternate splicin…
ENSG00000110324	IL10RA	chr11	normal_specific	NA	NA	-0.460506	0.000258364	interleukin 10 receptor subunit alpha	The protein encoded by this gene is a receptor for interleukin 10. This protein is structurally related to interferon receptors. It has been shown to mediate the immunosuppressive signal of interleukin 10, and thus inhibits the synthesis of proinflammatory cytokines. This receptor is reported to promote survival of progenitor myeloid cells through the insulin receptor substrate-2/PI 3-kinase/AKT …
ENSG00000164535	DAGLB	chr7	normal_specific	NA	NA	-0.228782	0.000265336	diacylglycerol lipase beta	NA
ENSG00000144840	RABL3	chr3	normal_specific	NA	NA	0.14362	0.000269977	RAB, member of RAS oncogene family like 3	NA
ENSG00000062282	DGAT2	chr11	normal_specific	NA	NA	-0.574386	0.000281899	diacylglycerol O-acyltransferase 2	This gene encodes one of two enzymes which catalyzes the final reaction in the synthesis of triglycerides in which diacylglycerol is covalently bound to long chain fatty acyl-CoAs. The encoded protein catalyzes this reaction at low concentrations of magnesium chloride while the other enzyme has high activity at high concentrations of magnesium chloride. Multiple transcript variants encoding diffe…
ENSG00000151892	GFRA1	chr10	normal_specific	NA	NA	-0.484688	0.000312227	GDNF family receptor alpha 1	This gene encodes a member of the glial cell line-derived neurotrophic factor receptor (GDNFR) family of proteins. The encoded preproprotein is proteolytically processed to generate the mature receptor. Glial cell line-derived neurotrophic factor (GDNF) and neurturin (NTN) are two structurally related, potent neurotrophic factors that play key roles in the control of neuron survival and different…
ENSG00000177432	NAP1L5	chr4	normal_specific	NA	NA	0.209122	0.000312227	nucleosome assembly protein 1 like 5	This gene encodes a protein that shares sequence similarity to nucleosome assembly factors, but may be localized to the cytoplasm rather than the nucleus. Expression of this gene is downregulated in hepatocellular carcinomas. This gene is located within a differentially methylated region (DMR) and is imprinted and paternally expressed. There is a related pseudogene on chromosome 4. [provided by R…
ENSG00000142347	MYO1F	chr19	normal_specific	NA	NA	-0.407788	0.000378959	myosin IF	Myosins are molecular motors that use the energy from ATP hydrolysis to generate force on actin filaments. The protein encoded by this gene is an unconventional myosin that may be involved in the intracellular movement of membrane-enclosed compartments. There is evidence to suggest that mutations in this gene can result in hearing loss. [provided by RefSeq, Jan 2017].
ENSG00000011600	TYROBP	chr19	normal_specific	NA	NA	-0.495735	0.000399637	transmembrane immune signaling adaptor TYROBP	This gene encodes a transmembrane signaling polypeptide which contains an immunoreceptor tyrosine-based activation motif (ITAM) in its cytoplasmic domain. The encoded protein may associate with the killer-cell inhibitory receptor (KIR) family of membrane glycoproteins and may act as an activating signal transduction element. This protein may bind zeta-chain (TCR) associated protein kinase 70kDa (…
ENSG00000182162	P2RY8	chrX	normal_specific	NA	NA	0.383506	0.000418319	P2Y receptor family member 8	The protein encoded by this gene belongs to the family of G-protein coupled receptors, that are preferentially activated by adenosine and uridine nucleotides. This gene is moderately expressed in undifferentiated HL60 cells, and is located on both chromosomes X and Y. [provided by RefSeq, Jul 2008].
ENSG00000040933	INPP4A	chr2	normal_specific	NA	NA	-0.143666	0.000461515	inositol polyphosphate-4-phosphatase type I A	This gene encodes an Mg++ independent enzyme that hydrolyzes the 4-position phosphate from the inositol ring of phosphatidylinositol 3,4-bisphosphate, inositol 1,3,4-trisphosphate, and inositol 3,4-bisphosphate. Multiple transcript variants encoding distinct isoforms have been described. [provided by RefSeq, Aug 2008].
ENSG00000110934	BIN2	chr12	normal_specific	NA	NA	-0.448403	0.000461515	bridging integrator 2	NA
ENSG00000165238	WNK2	chr9	normal_specific	NA	NA	0.322574	0.000461515	WNK lysine deficient protein kinase 2	The protein encoded by this gene is a cytoplasmic serine-threonine kinase that belongs to the protein kinase superfamily. The protein plays an important role in the regulation of electrolyte homeostasis, cell signaling survival, and proliferation. Alternative splicing results in multiple transcript variants. [provided by RefSeq, Sep 2013].
ENSG00000184828	ZBTB7C	chr18	normal_specific	NA	NA	0.257407	0.000461515	zinc finger and BTB domain containing 7C	NA
ENSG00000135077	HAVCR2	chr5	normal_specific	NA	NA	-0.460494	0.000526757	hepatitis A virus cellular receptor 2	The protein encoded by this gene belongs to the immunoglobulin superfamily, and TIM family of proteins. CD4-positive T helper lymphocytes can be divided into types 1 (Th1) and 2 (Th2) on the basis of their cytokine secretion patterns. Th1 cells are involved in cell-mediated immunity to intracellular pathogens and delayed-type hypersensitivity reactions, whereas, Th2 cells are involved in the cont…
ENSG00000104177	MYEF2	chr15	normal_specific	NA	NA	0.355198	0.00056389	myelin expression factor 2	NA
ENSG00000186818	LILRB4	chr19	normal_specific	NA	NA	-0.580518	0.000620345	leukocyte immunoglobulin like receptor B4	This gene is a member of the leukocyte immunoglobulin-like receptor (LIR) family, which is found in a gene cluster at chromosomal region 19q13.4. The encoded protein belongs to the subfamily B class of LIR receptors which contain two or four extracellular immunoglobulin domains, a transmembrane domain, and two to four cytoplasmic immunoreceptor tyrosine-based inhibitory motifs (ITIMs). The recept…
ENSG00000104881	PPP1R13L	chr19	normal_specific	NA	NA	-0.207811	0.000635311	protein phosphatase 1 regulatory subunit 13 like	IASPP is one of the most evolutionarily conserved inhibitors of p53 (TP53; MIM 191170), whereas ASPP1 (MIM 606455) and ASPP2 (MIM 602143) are activators of p53.[supplied by OMIM, Mar 2008].
ENSG00000145332	KLHL8	chr4	normal_specific	NA	NA	0.161819	0.000635311	kelch like family member 8	NA
ENSG00000126882	FAM78A	chr9	normal_specific	NA	NA	-0.397582	0.000639637	family with sequence similarity 78 member A	NA
ENSG00000130348	QRSL1	chr6	normal_specific	NA	NA	0.132345	0.000641397	glutaminyl-tRNA amidotransferase subunit QRSL1	NA
ENSG00000092929	UNC13D	chr17	normal_specific	NA	NA	-0.341048	0.00065065	unc-13 homolog D	This gene encodes a protein that is a member of the UNC13 family, containing similar domain structure as other family members but lacking an N-terminal phorbol ester-binding C1 domain present in other Munc13 proteins. The protein appears to play a role in vesicle maturation during exocytosis and is involved in regulation of cytolytic granules secretion. Mutations in this gene are associated with …
ENSG00000154451	GBP5	chr1	normal_specific	NA	NA	-0.621902	0.00066207	guanylate binding protein 5	This gene belongs to the TRAFAC class dynamin-like GTPase superfamily. The encoded protein acts as an activator of NLRP3 inflammasome assembly and has a role in innate immunity and inflammation. Alternative splicing results in multiple transcript variants. [provided by RefSeq, Jan 2017].
ENSG00000151304	SRFBP1	chr5	normal_specific	NA	NA	0.173704	0.000730243	serum response factor binding protein 1	NA
ENSG00000158717	RNF166	chr16	normal_specific	NA	NA	-0.224731	0.000736424	ring finger protein 166	NA
ENSG00000198848	CES1	chr16	normal_specific	NA	NA	-0.626186	0.000746286	carboxylesterase 1	This gene encodes a member of the carboxylesterase large family. The family members are responsible for the hydrolysis or transesterification of various xenobiotics, such as cocaine and heroin, and endogenous substrates with ester, thioester, or amide bonds. They may participate in fatty acyl and cholesterol ester metabolism, and may play a role in the blood-brain barrier system. This enzyme is t…
ENSG00000130294	KIF1A	chr2	normal_specific	NA	NA	0.616034	0.000766708	kinesin family member 1A	The protein encoded by this gene is a member of the kinesin family and functions as an anterograde motor protein that transports membranous organelles along axonal microtubules. Mutations at this locus have been associated with spastic paraplegia-30 and hereditary sensory neuropathy IIC. Alternatively spliced transcript variants encoding distinct isoforms have been described. [provided by RefSeq,…
ENSG00000219159	AC011298.2	chr2	normal_specific	NA	NA	-0.731048	0.000805651	NA	NA
ENSG00000086475	SEPHS1	chr10	normal_specific	NA	NA	0.111267	0.000814407	selenophosphate synthetase 1	This gene encodes an enzyme that synthesizes selenophosphate from selenide and ATP. Selenophosphate is the selenium donor used to synthesize selenocysteine, which is co-translationally incorporated into selenoproteins at in-frame UGA codons. [provided by RefSeq, Sep 2010].
ENSG00000007908	SELE	chr1	normal_specific	NA	NA	0.873764	0.000848704	selectin E	The protein encoded by this gene is found in cytokine-stimulated endothelial cells and is thought to be responsible for the accumulation of blood leukocytes at sites of inflammation by mediating the adhesion of cells to the vascular lining. It exhibits structural features such as the presence of lectin- and EGF-like domains followed by short consensus repeat (SCR) domains that contain 6 conserved…
ENSG00000108946	PRKAR1A	chr17	normal_specific	NA	NA	0.134156	0.000913235	protein kinase cAMP-dependent type I regulatory subunit alpha	cAMP is a signaling molecule important for a variety of cellular functions. cAMP exerts its effects by activating the cAMP-dependent protein kinase, which transduces the signal through phosphorylation of different target proteins. The inactive kinase holoenzyme is a tetramer composed of two regulatory and two catalytic subunits. cAMP causes the dissociation of the inactive holoenzyme into a dimer…
ENSG00000136827	TOR1A	chr9	normal_specific	NA	NA	0.102306	0.000913235	torsin family 1 member A	The protein encoded by this gene is a member of the AAA family of adenosine triphosphatases (ATPases), is related to the Clp protease/heat shock family and is expressed prominently in the substantia nigra pars compacta. Mutations in this gene result in the autosomal dominant disorder, torsion dystonia 1. [provided by RefSeq, Jul 2008].
ENSG00000146094	DOK3	chr5	normal_specific	NA	NA	-0.382703	0.00095377	docking protein 3	NA
ENSG00000155959	VBP1	chrX	normal_specific	NA	NA	0.13225	0.00095377	VHL binding protein 1	The protein encoded by this gene interacts with the Von Hippel-Lindau protein to form an intracellular complex. The encoded protein functions as a chaperone protein, and may play a role in the transport of the Von Hippel-Lindau protein from the perinuclear granules to the nucleus or cytoplasm. Alternative splicing and the use of alternate transcription start sites results in multiple transcript v…
ENSG00000130775	THEMIS2	chr1	normal_specific	NA	NA	-0.354916	0.000966856	thymocyte selection associated family member 2	NA
ENSG00000138964	PARVG	chr22	normal_specific	NA	NA	-0.480384	0.000966856	parvin gamma	Members of the parvin family, including PARVG, are actin-binding proteins associated with focal contacts.[supplied by OMIM, Aug 2004].
ENSG00000141480	ARRB2	chr17	normal_specific	NA	NA	-0.255097	0.00100529	arrestin beta 2	Members of arrestin/beta-arrestin protein family are thought to participate in agonist-mediated desensitization of G-protein-coupled receptors and cause specific dampening of cellular responses to stimuli such as hormones, neurotransmitters, or sensory signals. Arrestin beta 2, like arrestin beta 1, was shown to inhibit beta-adrenergic receptor function in vitro. It is expressed at high levels in…
ENSG00000154760	SLFN13	chr17	normal_specific	NA	NA	-0.221998	0.00102865	schlafen family member 13	NA
ENSG00000171262	FAM98B	chr15	normal_specific	NA	NA	0.127353	0.00104264	family with sequence similarity 98 member B	NA
ENSG00000182836	PLCXD3	chr5	normal_specific	NA	NA	-0.441254	0.00104264	phosphatidylinositol specific phospholipase C X domain containing 3	NA
ENSG00000169896	ITGAM	chr16	normal_specific	NA	NA	-0.428589	0.00106125	integrin subunit alpha M	This gene encodes the integrin alpha M chain. Integrins are heterodimeric integral membrane proteins composed of an alpha chain and a beta chain. This I-domain containing alpha integrin combines with the beta 2 chain (ITGB2) to form a leukocyte-specific integrin referred to as macrophage receptor 1 ('Mac-1'), or inactivated-C3b (iC3b) receptor 3 ('CR3'). The alpha M beta 2 integrin is important i…
ENSG00000182307	C8orf33	chr8	normal_specific	NA	NA	0.125525	0.00107462	chromosome 8 open reading frame 33	NA
ENSG00000124508	BTN2A2	chr6	normal_specific	NA	NA	-0.231863	0.00119866	butyrophilin subfamily 2 member A2	Butyrophilin is the major protein associated with fat droplets in the milk. This gene is a member of the BTN2 subfamily of genes, which encode proteins belonging to the butyrophilin protein family. The gene is located in a cluster on chromosome 6, consisting of seven genes belonging to the expanding B7/butyrophilin-like group, a subset of the immunoglobulin gene superfamily. The encoded protein i…
ENSG00000143119	CD53	chr1	normal_specific	NA	NA	-0.458746	0.00119866	CD53 molecule	The protein encoded by this gene is a member of the transmembrane 4 superfamily, also known as the tetraspanin family. Most of these members are cell-surface proteins that are characterized by the presence of four hydrophobic domains. The proteins mediate signal transduction events that play a role in the regulation of cell development, activation, growth and motility. This encoded protein is a c…
ENSG00000171533	MAP6	chr11	normal_specific	NA	NA	0.224662	0.00119866	microtubule associated protein 6	This gene encodes a microtubule-associated protein. The encoded protein is a calmodulin-binding and calmodulin-regulated protein that is involved in microtubule stabilization. Two transcript variants encoding distinct isoforms have been identified for this gene. [provided by RefSeq, Jul 2008].
ENSG00000177084	POLE	chr12	normal_specific	NA	NA	-0.167076	0.00119866	DNA polymerase epsilon, catalytic subunit	This gene encodes the catalytic subunit of DNA polymerase epsilon. The enzyme is involved in DNA repair and chromosomal DNA replication. Mutations in this gene have been associated with colorectal cancer 12 and facial dysmorphism, immunodeficiency, livedo, and short stature. [provided by RefSeq, Sep 2013].
ENSG00000160219	GAB3	chrX	normal_specific	NA	NA	-0.183166	0.00120147	GRB2 associated binding protein 3	This gene is a member of the GRB2-associated binding protein gene family. These proteins are scaffolding/docking proteins that are involved in several growth factor and cytokine signaling pathways, and they contain a pleckstrin homology domain, and bind SHP2 tyrosine phosphatase and GRB2 adapter protein. The protein encoded by this gene facilitates macrophage differentiation. Alternative splicing…
ENSG00000204257	HLA-DMA	chr6	normal_specific	NA	NA	-0.33426	0.00120147	major histocompatibility complex, class II, DM alpha	HLA-DMA belongs to the HLA class II alpha chain paralogues. This class II molecule is a heterodimer consisting of an alpha (DMA) and a beta chain (DMB), both anchored in the membrane. It is located in intracellular vesicles. DM plays a central role in the peptide loading of MHC class II molecules by helping to release the CLIP molecule from the peptide binding site. Class II molecules are express…
ENSG00000111845	PAK1IP1	chr6	normal_specific	NA	NA	0.183258	0.00120543	PAK1 interacting protein 1	NA
ENSG00000204642	HLA-F	chr6	normal_specific	NA	NA	-0.29419	0.0012092	major histocompatibility complex, class I, F	This gene belongs to the HLA class I heavy chain paralogues. It encodes a non-classical heavy chain that forms a heterodimer with a beta-2 microglobulin light chain, with the heavy chain anchored in the membrane. Unlike most other HLA heavy chains, this molecule is localized in the endoplasmic reticulum and Golgi apparatus, with a small amount present at the cell surface in some cell types. It co…
ENSG00000006468	ETV1	chr7	normal_specific	NA	NA	0.294315	0.0012559	ETS variant transcription factor 1	This gene encodes a member of the ETS (E twenty-six) family of transcription factors. The ETS proteins regulate many target genes that modulate biological processes like cell growth, angiogenesis, migration, proliferation and differentiation. All ETS proteins contain an ETS DNA-binding domain that binds to DNA sequences containing the consensus 5'-CGGA[AT]-3'. The protein encoded by this gene con…
ENSG00000103494	RPGRIP1L	chr16	normal_specific	NA	NA	0.177478	0.00134112	RPGRIP1 like	The protein encoded by this gene can localize to the basal body-centrosome complex or to primary cilia and centrosomes in ciliated cells. The encoded protein has been found to interact with nephrocystin-4. Defects in this gene are a cause of Joubert syndrome type 7 (JBTS7) and Meckel syndrome type 5 (MKS5). [provided by RefSeq, Jun 2016].
ENSG00000147443	DOK2	chr8	normal_specific	NA	NA	-0.473668	0.00143722	docking protein 2	The protein encoded by this gene is constitutively tyrosine phosphorylated in hematopoietic progenitors isolated from chronic myelogenous leukemia (CML) patients in the chronic phase. It may be a critical substrate for p210(bcr/abl), a chimeric protein whose presence is associated with CML. This encoded protein binds p120 (RasGAP) from CML cells. [provided by RefSeq, Jul 2008].
ENSG00000132837	DMGDH	chr5	normal_specific	NA	NA	0.278465	0.00148004	dimethylglycine dehydrogenase	This gene encodes an enzyme involved in the catabolism of choline, catalyzing the oxidative demethylation of dimethylglycine to form sarcosine. The enzyme is found as a monomer in the mitochondrial matrix, and uses flavin adenine dinucleotide and folate as cofactors. Mutation in this gene causes dimethylglycine dehydrogenase deficiency, characterized by a fishlike body odor, chronic muscle fatigu…
ENSG00000112232	KHDRBS2	chr6	normal_specific	NA	NA	0.401239	0.0015031	KH RNA binding domain containing, signal transduction associated 2	NA
ENSG00000183186	C2CD4C	chr19	normal_specific	NA	NA	-0.68859	0.00151879	C2 calcium dependent domain containing 4C	NA
ENSG00000204923	FBXO48	chr2	normal_specific	NA	NA	-0.217822	0.00152555	F-box protein 48	NA
ENSG00000189171	S100A13	chr1	normal_specific	NA	NA	-0.163919	0.00167683	S100 calcium binding protein A13	The protein encoded by this gene is a member of the S100 family of proteins containing 2 EF-hand calcium-binding motifs. S100 proteins are localized in the cytoplasm and/or nucleus of a wide range of cells, and involved in the regulation of a number of cellular processes such as cell cycle progression and differentiation. S100 genes include at least 13 members which are located as a cluster on ch…
ENSG00000110876	SELPLG	chr12	normal_specific	NA	NA	-0.421596	0.00170109	selectin P ligand	This gene encodes a glycoprotein that functions as a high affinity counter-receptor for the cell adhesion molecules P-, E- and L- selectin expressed on myeloid cells and stimulated T lymphocytes. As such, this protein plays a critical role in leukocyte trafficking during inflammation by tethering of leukocytes to activated platelets or endothelia expressing selectins. This protein requires two po…
ENSG00000172243	CLEC7A	chr12	normal_specific	NA	NA	-0.477589	0.00175939	C-type lectin domain containing 7A	This gene encodes a member of the C-type lectin/C-type lectin-like domain (CTL/CTLD) superfamily. The encoded glycoprotein is a small type II membrane receptor with an extracellular C-type lectin-like domain fold and a cytoplasmic domain with an immunoreceptor tyrosine-based activation motif. It functions as a pattern-recognition receptor that recognizes a variety of beta-1,3-linked and beta-1,6-…
ENSG00000204852	TCTN1	chr12	normal_specific	NA	NA	0.150038	0.00177262	tectonic family member 1	This gene encodes a member of a family of secreted and transmembrane proteins. The orthologous gene in mouse functions downstream of smoothened and rab23 to modulate hedgehog signal transduction. This protein is a component of the tectonic-like complex, which forms a barrier between the ciliary axoneme and the basal body. A mutation in this gene was found in a family with Joubert syndrome-13. Alt…
ENSG00000260563	RP13-516M14.1	chr17	normal_specific	NA	NA	-0.237031	0.00177262	NA	NA
ENSG00000123338	NCKAP1L	chr12	normal_specific	NA	NA	-0.448769	0.00186864	NCK associated protein 1 like	This gene encodes a member of the HEM family of tissue-specific transmembrane proteins which are highly conserved from invertebrates through mammals. This gene is only expressed in hematopoietic cells. The encoded protein is a part of the Scar/WAVE complex which plays an important role in regulating cell shape in both metazoans and plants. Alternatively spliced transcript variants encoding differ…
ENSG00000185101	ANO9	chr11	normal_specific	NA	NA	-0.31537	0.00186864	anoctamin 9	The protein encoded by this gene is a member of the TMEM16 (anoctamin) family of proteins, some of which form integral membrane calcium-activated chloride channels. The function of the encoded protein has yet to be elucidated, although it may have channel-forming abilities and also may have phospholipid scramblase activity. This gene has been observed to be upregulated in stage II and III colorec…
ENSG00000069493	CLEC2D	chr12	normal_specific	NA	NA	-0.324299	0.00209853	C-type lectin domain family 2 member D	This gene encodes a member of the natural killer cell receptor C-type lectin family. The encoded protein inhibits osteoclast formation and contains a transmembrane domain near the N-terminus as well as the C-type lectin-like extracellular domain. Several alternatively spliced transcript variants have been identified for this gene. [provided by RefSeq, Oct 2010].
ENSG00000124120	TTPAL	chr20	normal_specific	NA	NA	0.194608	0.00213595	alpha tocopherol transfer protein like	NA
ENSG00000177125	ZBTB34	chr9	normal_specific	NA	NA	-0.148631	0.00213595	zinc finger and BTB domain containing 34	NA
ENSG00000172578	KLHL6	chr3	normal_specific	NA	NA	-0.486529	0.00219431	kelch like family member 6	This gene encodes a member of the kelch-like (KLHL) family of proteins, which is involved in B-lymphocyte antigen receptor signaling and germinal-center B-cell maturation. The encoded protein contains an N-terminal broad-complex, tramtrack and bric a brac (BTB) domain that facilitates protein binding and dimerization, a BTB and C-terminal kelch (BACK) domain, and six C-terminal kelch repeat domai…
ENSG00000012779	ALOX5	chr10	normal_specific	NA	NA	-0.466688	0.00230371	arachidonate 5-lipoxygenase	This gene encodes a member of the lipoxygenase gene family and plays a dual role in the synthesis of leukotrienes from arachidonic acid. The encoded protein, which is expressed specifically in bone marrow-derived cells, catalyzes the conversion of arachidonic acid to 5(S)-hydroperoxy-6-trans-8,11,14-cis-eicosatetraenoic acid, and further to the allylic epoxide 5(S)-trans-7,9-trans-11,14-cis-eicos…
ENSG00000135929	CYP27A1	chr2	normal_specific	NA	NA	-0.251621	0.00243744	cytochrome P450 family 27 subfamily A member 1	This gene encodes a member of the cytochrome P450 superfamily of enzymes. The cytochrome P450 proteins are monooxygenases which catalyze many reactions involved in drug metabolism and synthesis of cholesterol, steroids and other lipids. This mitochondrial protein oxidizes cholesterol intermediates as part of the bile synthesis pathway. Since the conversion of cholesterol to bile acids is the majo…
ENSG00000155465	SLC7A7	chr14	normal_specific	NA	NA	-0.264477	0.00244744	solute carrier family 7 member 7	The protein encoded by this gene is the light subunit of a cationic amino acid transporter. This sodium-independent transporter is formed when the light subunit encoded by this gene dimerizes with the heavy subunit transporter protein SLC3A2. This transporter is found in epithelial cell membranes where it transfers cationic and large neutral amino acids from the cell to the extracellular space. D…
ENSG00000153832	FBXO36	chr2	normal_specific	NA	NA	0.217404	0.00251633	F-box protein 36	Members of the F-box protein family, such as FBXO36, are characterized by an approximately 40-amino acid F-box motif. SCF complexes, formed by SKP1 (MIM 601434), cullin (see CUL1; MIM 603134), and F-box proteins, act as protein-ubiquitin ligases. F-box proteins interact with SKP1 through the F box, and they interact with ubiquitination targets through other protein interaction domains (Jin et al.…
ENSG00000160255	ITGB2	chr21	normal_specific	NA	NA	-0.440119	0.00253945	integrin subunit beta 2	This gene encodes an integrin beta chain, which combines with multiple different alpha chains to form different integrin heterodimers. Integrins are integral cell-surface proteins that participate in cell adhesion as well as cell-surface mediated signalling. The encoded protein plays an important role in immune response and defects in this gene cause leukocyte adhesion deficiency. Alternative spl…
ENSG00000148158	SNX30	chr9	normal_specific	NA	NA	-0.163097	0.00265267	sorting nexin family member 30	NA
ENSG00000128791	TWSG1	chr18	normal_specific	NA	NA	0.17105	0.00265289	twisted gastrulation BMP signaling modulator 1	NA
ENSG00000141505	ASGR1	chr17	normal_specific	NA	NA	-0.290313	0.00268342	asialoglycoprotein receptor 1	This gene encodes a subunit of the asialoglycoprotein receptor. This receptor is a transmembrane protein that plays a critical role in serum glycoprotein homeostasis by mediating the endocytosis and lysosomal degradation of glycoproteins with exposed terminal galactose or N-acetylgalactosamine residues. The asialoglycoprotein receptor may facilitate hepatic infection by multiple viruses including…
ENSG00000168827	GFM1	chr3	normal_specific	NA	NA	0.144773	0.00275355	G elongation factor mitochondrial 1	Eukaryotes contain two protein translational systems, one in the cytoplasm and one in the mitochondria. Mitochondrial translation is crucial for maintaining mitochondrial function and mutations in this system lead to a breakdown in the respiratory chain-oxidative phosphorylation system and to impaired maintenance of mitochondrial DNA. This gene encodes one of the mitochondrial translation elongat…
ENSG00000105971	CAV2	chr7	normal_specific	NA	NA	0.26032	0.00291803	caveolin 2	The protein encoded by this gene is a major component of the inner surface of caveolae, small invaginations of the plasma membrane, and is involved in essential cellular functions, including signal transduction, lipid metabolism, cellular growth control and apoptosis. This protein may function as a tumor suppressor. This gene and related family member (CAV1) are located next to each other on chro…
ENSG00000110680	CALCA	chr11	normal_specific	NA	NA	2.18166	0.00291803	calcitonin related polypeptide alpha	This gene encodes the peptide hormones calcitonin, calcitonin gene-related peptide and katacalcin by tissue-specific alternative RNA splicing of the gene transcripts and cleavage of inactive precursor proteins. Calcitonin is involved in calcium regulation and acts to regulate phosphorus metabolism. Calcitonin gene-related peptide functions as a vasodilator and as an antimicrobial peptide while ka…
ENSG00000072694	FCGR2B	chr1	normal_specific	NA	NA	-0.500303	0.00295006	Fc fragment of IgG receptor IIb	The protein encoded by this gene is a low affinity receptor for the Fc region of immunoglobulin gamma complexes. The encoded protein is involved in the phagocytosis of immune complexes and in the regulation of antibody production by B-cells. Variations in this gene may increase susceptibilty to systemic lupus erythematosus (SLE). Several transcript variants encoding different isoforms have been f…
ENSG00000107819	SFXN3	chr10	normal_specific	NA	NA	-0.204735	0.00295377	sideroflexin 3	NA
ENSG00000111358	GTF2H3	chr12	normal_specific	NA	NA	0.114906	0.00295725	general transcription factor IIH subunit 3	This gene encodes a member of the TFB4 family. The encoded protein is a subunit of the core-TFIIH basal transcription factor and localizes to the nucleus. The encoded protein is involved in RNA transcription by RNA polymerase II and nucleotide excision repair and associates with the Cdk-activating kinase complex. Alternative splicing results in multiple transcript variants. A related pseudogene h…
ENSG00000141337	ARSG	chr17	normal_specific	NA	NA	0.326659	0.00295725	arylsulfatase G	The protein encoded by this gene belongs to the sulfatase enzyme family. Sulfatases hydrolyze sulfate esters from sulfated steroids, carbohydrates, proteoglycans, and glycolipids. They are involved in hormone biosynthesis, modulation of cell signaling, and degradation of macromolecules. This protein displays arylsulfatase activity at acidic pH, as is typical of lysosomal sulfatases, and has been …
ENSG00000176896	TCEANC	chrX	normal_specific	NA	NA	-0.216142	0.00307888	transcription elongation factor A N-terminal and central domain containing	NA
ENSG00000110077	MS4A6A	chr11	normal_specific	NA	NA	-0.488247	0.00311419	membrane spanning 4-domains A6A	This gene encodes a member of the membrane-spanning 4A gene family. Members of this nascent protein family are characterized by common structural features and similar intron/exon splice boundaries and display unique expression patterns among hematopoietic cells and nonlymphoid tissues. The gene encoding this protein is localized to 11q12.1, among a cluster of family members. Alternative splicing …
ENSG00000112796	ENPP5	chr6	normal_specific	NA	NA	0.235091	0.00311419	ectonucleotide pyrophosphatase/phosphodiesterase family member 5	This gene encodes a type-I transmembrane glycoprotein. Studies in rat suggest the encoded protein may play a role in neuronal cell communications. Alternatively spliced transcript variants have been described. [provided by RefSeq, Feb 2014].
ENSG00000113621	TXNDC15	chr5	normal_specific	NA	NA	0.116423	0.00311419	thioredoxin domain containing 15	This gene encodes a member of the thioredoxin superfamily. Members of this family are characterized by a conserved active motif called the thioredoxin fold that catalyzes disulfide bond formation and isomerization. [provided by RefSeq, Apr 2017].
ENSG00000159212	CLIC6	chr21	normal_specific	NA	NA	0.296862	0.00311419	chloride intracellular channel 6	This gene encodes a member of the chloride intracellular channel family of proteins. The gene is part of a large triplicated region found on chromosomes 1, 6, and 21. Alternative splicing results in multiple transcript variants encoding different isoforms. [provided by RefSeq, Nov 2015].
ENSG00000135387	CAPRIN1	chr11	normal_specific	NA	NA	0.0938978	0.00313055	cell cycle associated protein 1	NA
ENSG00000144724	PTPRG	chr3	normal_specific	NA	NA	0.18723	0.00315048	protein tyrosine phosphatase receptor type G	The protein encoded by this gene is a member of the protein tyrosine phosphatase (PTP) family. PTPs are known to be signaling molecules that regulate a variety of cellular processes including cell growth, differentiation, mitotic cycle, and oncogenic transformation. This PTP possesses an extracellular region, a single transmembrane region, and two tandem intracytoplasmic catalytic domains, and th…
ENSG00000188997	KCTD21	chr11	normal_specific	NA	NA	-0.150751	0.00330115	potassium channel tetramerization domain containing 21	NA
ENSG00000090238	YPEL3	chr16	normal_specific	NA	NA	-0.248766	0.00341675	yippee like 3	NA
ENSG00000015285	WAS	chrX	normal_specific	NA	NA	-0.385756	0.00367589	WASP actin nucleation promoting factor	The Wiskott-Aldrich syndrome (WAS) family of proteins share similar domain structure, and are involved in transduction of signals from receptors on the cell surface to the actin cytoskeleton. The presence of a number of different motifs suggests that they are regulated by a number of different stimuli, and interact with multiple proteins. Recent studies have demonstrated that these proteins, dire…
ENSG00000129667	RHBDF2	chr17	normal_specific	NA	NA	-0.185758	0.00367589	rhomboid 5 homolog 2	NA
ENSG00000155189	AGPAT5	chr8	normal_specific	NA	NA	0.151296	0.00371412	1-acylglycerol-3-phosphate O-acyltransferase 5	This gene encodes a member of the 1-acylglycerol-3-phosphate O-acyltransferase family. This integral membrane protein converts lysophosphatidic acid to phosphatidic acid, the second step in de novo phospholipid biosynthesis. A pseudogene of this gene is present on the Y chromosome. [provided by RefSeq, Aug 2014].
ENSG00000147162	OGT	chrX	normal_specific	NA	NA	-0.197589	0.00373171	O-linked N-acetylglucosamine (GlcNAc) transferase	This gene encodes a glycosyltransferase that catalyzes the addition of a single N-acetylglucosamine in O-glycosidic linkage to serine or threonine residues. Since both phosphorylation and glycosylation compete for similar serine or threonine residues, the two processes may compete for sites, or they may alter the substrate specificity of nearby sites by steric or electrostatic effects. The protei…
ENSG00000178726	THBD	chr20	normal_specific	NA	NA	0.335753	0.00373171	thrombomodulin	The protein encoded by this intronless gene is an endothelial-specific type I membrane receptor that binds thrombin. This binding results in the activation of protein C, which degrades clotting factors Va and VIIIa and reduces the amount of thrombin generated. Mutations in this gene are a cause of thromboembolic disease, also known as inherited thrombophilia. [provided by RefSeq, Jul 2008].
ENSG00000102032	RENBP	chrX	normal_specific	NA	NA	-0.287177	0.00388535	renin binding protein	The gene product inhibits renin activity by forming a dimer with renin, a complex known as high molecular weight renin. The encoded protein contains a leucine zipper domain, which is essential for its dimerization with renin. The gene product can catalyze the interconversion of N-acetylglucosamine to N-acetylmannosamine, indicating that it is a GlcNAc 2-epimerase. Transcript variants utilizing al…
ENSG00000188343	FAM92A1	chr8	normal_specific	NA	NA	0.158333	0.00388714	CBY1 interacting BAR domain containing 1	NA
ENSG00000136244	IL6	chr7	normal_specific	NA	NA	0.981097	0.00398477	interleukin 6	This gene encodes a cytokine that functions in inflammation and the maturation of B cells. In addition, the encoded protein has been shown to be an endogenous pyrogen capable of inducing fever in people with autoimmune diseases or infections. The protein is primarily produced at sites of acute and chronic inflammation, where it is secreted into the serum and induces a transcriptional inflammatory…
ENSG00000163050	ADCK3	chr1	normal_specific	NA	NA	-0.171769	0.00398477	coenzyme Q8A	This gene encodes a mitochondrial protein similar to yeast ABC1, which functions in an electron-transferring membrane protein complex in the respiratory chain. It is not related to the family of ABC transporter proteins. Expression of this gene is induced by the tumor suppressor p53 and in response to DNA damage, and inhibiting its expression partially suppresses p53-induced apoptosis. Alternativ…
ENSG00000198851	CD3E	chr11	normal_specific	NA	NA	-0.466224	0.00409451	CD3e molecule	The protein encoded by this gene is the CD3-epsilon polypeptide, which together with CD3-gamma, -delta and -zeta, and the T-cell receptor alpha/beta and gamma/delta heterodimers, forms the T-cell receptor-CD3 complex. This complex plays an important role in coupling antigen recognition to several intracellular signal-transduction pathways. The genes encoding the epsilon, gamma and delta polypepti…
ENSG00000173372	C1QA	chr1	normal_specific	NA	NA	-0.523483	0.00421245	complement C1q A chain	This gene encodes the A-chain polypeptide of serum complement subcomponent C1q, which associates with C1r and C1s to yield the first component of the serum complement system. C1q deficiency is associated with lupus erythematosus and glomerulonephritis. C1q is composed of 18 polypeptide chains which include 6 A-chains, 6 B-chains, and 6 C-chains. Each chain contains an N-terminal collagen-like reg…
ENSG00000176531	PHLDB3	chr19	normal_specific	NA	NA	-0.232681	0.00421853	pleckstrin homology like domain family B member 3	NA
ENSG00000079931	MOXD1	chr6	normal_specific	NA	NA	0.426164	0.00427341	monooxygenase DBH like 1	NA
ENSG00000099284	H2AFY2	chr10	normal_specific	NA	NA	0.202363	0.00428161	macroH2A.2 histone	Histones are basic nuclear proteins that are responsible for the nucleosome structure of the chromosomal fiber in eukaryotes. Nucleosomes consist of approximately 146 bp of DNA wrapped around a histone octamer composed of pairs of each of the four core histones (H2A, H2B, H3, and H4). The chromatin fiber is further compacted through the interaction of a linker histone, H1, with the DNA between th…
ENSG00000136143	SUCLA2	chr13	normal_specific	NA	NA	0.120041	0.00428202	succinate-CoA ligase ADP-forming subunit beta	Succinyl-CoA synthetase (SCS) is a mitochondrial matrix enzyme that acts as a heterodimer, being composed of an invariant alpha subunit and a substrate-specific beta subunit. The protein encoded by this gene is an ATP-specific SCS beta subunit that dimerizes with the SCS alpha subunit to form SCS-A, an essential component of the tricarboxylic acid cycle. SCS-A hydrolyzes ATP to convert succinate …
ENSG00000059377	TBXAS1	chr7	normal_specific	NA	NA	-0.37481	0.00432989	thromboxane A synthase 1	This gene encodes a member of the cytochrome P450 superfamily of enzymes. The cytochrome P450 proteins are monooxygenases which catalyze many reactions involved in drug metabolism and synthesis of cholesterol, steroids and other lipids. However, this protein is considered a member of the cytochrome P450 superfamily on the basis of sequence similarity rather than functional similarity. This endopl…
ENSG00000079277	MKNK1	chr1	normal_specific	NA	NA	-0.122599	0.00432989	MAPK interacting serine/threonine kinase 1	This gene encodes a Ser/Thr protein kinase that interacts with, and is activated by ERK1 and p38 mitogen-activated protein kinases, and thus may play a role in the response to environmental stress and cytokines. This kinase may also regulate transcription by phosphorylating eIF4E via interaction with the C-terminal region of eIF4G. Alternatively spliced transcript variants have been noted for thi…
ENSG00000066336	SPI1	chr11	normal_specific	NA	NA	-0.36667	0.00441722	Spi-1 proto-oncogene	This gene encodes an ETS-domain transcription factor that activates gene expression during myeloid and B-lymphoid cell development. The nuclear protein binds to a purine-rich sequence known as the PU-box found near the promoters of target genes, and regulates their expression in coordination with other transcription factors and cofactors. The protein can also regulate alternative splicing of targ…
ENSG00000110195	FOLR1	chr11	normal_specific	NA	NA	0.40779	0.00441722	folate receptor alpha	The protein encoded by this gene is a member of the folate receptor family. Members of this gene family bind folic acid and its reduced derivatives, and transport 5-methyltetrahydrofolate into cells. This gene product is a secreted protein that either anchors to membranes via a glycosyl-phosphatidylinositol linkage or exists in a soluble form. Mutations in this gene have been associated with neur…
ENSG00000023892	DEF6	chr6	normal_specific	NA	NA	-0.274276	0.00445312	DEF6 guanine nucleotide exchange factor	DEF6, or IBP, is a guanine nucleotide exchange factor (GEF) for RAC (MIM 602048) and CDC42 (MIM 116952) that is highly expressed in B and T cells (Gupta et al., 2003 [PubMed 12923183]).[supplied by OMIM, Mar 2008].
ENSG00000090382	LYZ	chr12	normal_specific	NA	NA	-0.531679	0.00445693	lysozyme	This gene encodes human lysozyme, whose natural substrate is the bacterial cell wall peptidoglycan (cleaving the beta[1-4]glycosidic linkages between N-acetylmuramic acid and N-acetylglucosamine). Lysozyme is one of the antimicrobial agents found in human milk, and is also present in spleen, lung, kidney, white blood cells, plasma, saliva, and tears. The protein has antibacterial activity against…
ENSG00000169413	RNASE6	chr14	normal_specific	NA	NA	-0.506761	0.00445693	ribonuclease A family member k6	The protein encoded by this gene is a member of the ribonuclease A superfamily and functions in the urinary tract. The protein has broad-spectrum antimicrobial activity against pathogenic bacteria. [provided by RefSeq, Nov 2014].
ENSG00000171860	C3AR1	chr12	normal_specific	NA	NA	-0.457951	0.00445693	complement C3a receptor 1	C3a is an anaphylatoxin released during activation of the complement system. The protein encoded by this gene is an orphan G protein-coupled receptor for C3a. Binding of C3a by the encoded receptor activates chemotaxis, granule enzyme release, superoxide anion production, and bacterial opsonization. [provided by RefSeq, May 2016].
ENSG00000128604	IRF5	chr7	normal_specific	NA	NA	-0.304715	0.0044727	interferon regulatory factor 5	This gene encodes a member of the interferon regulatory factor (IRF) family, a group of transcription factors with diverse roles, including virus-mediated activation of interferon, and modulation of cell growth, differentiation, apoptosis, and immune system activity. Members of the IRF family are characterized by a conserved N-terminal DNA-binding domain containing tryptophan (W) repeats. Alterna…
ENSG00000127054	CPSF3L	chr1	normal_specific	NA	NA	-0.112115	0.00447619	integrator complex subunit 11	The Integrator complex contains at least 12 subunits and associates with the C-terminal domain of RNA polymerase II large subunit (POLR2A; MIM 180660) and mediates the 3-prime end processing of small nuclear RNAs U1 (RNU1; MIM 180680) and U2 (RNU2; MIM 180690). INTS11, or CPSF3L, is the catalytic subunit of the Integrator complex (Baillat et al., 2005 [PubMed 16239144]).[supplied by OMIM, Mar 200…
ENSG00000099331	MYO9B	chr19	normal_specific	NA	NA	-0.140842	0.00458536	myosin IXB	This gene encodes a member of the myosin family of actin-based molecular motor heavy chain proteins. The protein represents an unconventional myosin; it should not be confused with the conventional non-muscle myosin-9 (MYH9). The protein has four IQ motifs located in the neck domain that bind calmodulin, which serves as a light chain. The protein complex has a single-headed structure and exhibits…
ENSG00000181409	AATK	chr17	normal_specific	NA	NA	0.272451	0.00463706	apoptosis associated tyrosine kinase	The protein encoded by this gene contains a tyrosine kinase domain at the N-terminus and a proline-rich domain at the C-terminus. This gene is induced during apoptosis, and expression of this gene may be a necessary pre-requisite for the induction of growth arrest and/or apoptosis of myeloid precursor cells. This gene has been shown to produce neuronal differentiation in a neuroblastoma cell line…
ENSG00000111785	RIC8B	chr12	normal_specific	NA	NA	0.119726	0.00464899	RIC8 guanine nucleotide exchange factor B	NA
ENSG00000100281	HMGXB4	chr22	normal_specific	NA	NA	0.101386	0.00474478	HMG-box containing 4	High mobility group (HMG) proteins are nonhistone chromosomal proteins. See HMG2 (MIM 163906) for additional information on HMG proteins.[supplied by OMIM, Nov 2010].
ENSG00000163644	PPM1K	chr4	normal_specific	NA	NA	-0.212389	0.00474478	protein phosphatase, Mg2+/Mn2+ dependent 1K	This gene encodes a member of the PPM family of Mn2+/Mg2+-dependent protein phosphatases. The encoded protein, essential for cell survival and development, is targeted to the mitochondria where it plays a key role in regulation of the mitochondrial permeability transition pore. [provided by RefSeq, Sep 2012].
ENSG00000197763	TXNRD3	chr3	normal_specific	NA	NA	0.1834	0.00474574	thioredoxin reductase 3	The protein encoded by this gene belongs to the pyridine nucleotide-disulfide oxidoreductase family, and is a member of the thioredoxin (Trx) system. Three thioredoxin reductase (TrxR) isozymes are found in mammals. TrxRs are selenocysteine-containing flavoenzymes, which reduce thioredoxins, as well as other substrates, and play a key role in redox homoeostasis. This gene encodes the third TrxR, …
ENSG00000173020	ADRBK1	chr11	normal_specific	NA	NA	-0.14223	0.00490341	G protein-coupled receptor kinase 2	This gene encodes a member of the G protein-coupled receptor kinase family of proteins. The encoded protein phosphorylates the beta-adrenergic receptor as well as a wide range of other substrates including non-GPCR cell surface receptors, and cytoskeletal, mitochondrial, and transcription factor proteins. Data from rodent models supports a role for this gene in embryonic development, heart functi…
ENSG00000198176	TFDP1	chr13	normal_specific	NA	NA	0.0981682	0.00490411	transcription factor Dp-1	This gene encodes a member of a family of transcription factors that heterodimerize with E2F proteins to enhance their DNA-binding activity and promote transcription from E2F target genes. The encoded protein functions as part of this complex to control the transcriptional activity of numerous genes involved in cell cycle progression from G1 to S phase. Alternative splicing results in multiple tr…
ENSG00000149781	FERMT3	chr11	normal_specific	NA	NA	-0.308999	0.00506216	fermitin family member 3	Kindlins are a small family of proteins that mediate protein-protein interactions involved in integrin activation and thereby have a role in cell adhesion, migration, differentiation, and proliferation. The protein encoded by this gene has a key role in the regulation of hemostasis and thrombosis. This protein may also help maintain the membrane skeleton of erythrocytes. Mutations in this gene ca…
ENSG00000173369	C1QB	chr1	normal_specific	NA	NA	-0.546839	0.00512398	complement C1q B chain	This gene encodes the B-chain polypeptide of serum complement subcomponent C1q, which associates with C1r and C1s to yield the first component of the serum complement system. C1q is composed of 18 polypeptide chains which include 6 A-chains, 6 B-chains, and 6 C-chains. Each chain contains an N-terminal collagen-like region and a C-terminal C1q globular domain. C1q deficiency is associated with lu…
ENSG00000088827	SIGLEC1	chr20	normal_specific	NA	NA	-0.509543	0.0052802	sialic acid binding Ig like lectin 1	This gene encodes a member of the immunoglobulin superfamily. The encoded protein is a lectin-like adhesion molecule that binds glycoconjugate ligands on cell surfaces in a sialic acid-dependent manner. It is a type I transmembrane protein expressed only by a subpopulation of macrophages and is involved in mediating cell-cell interactions. Alternative splicing produces a transcript variant encodi…
ENSG00000245937	LINC01184	chr5	normal_specific	NA	NA	0.110325	0.0053068	long intergenic non-protein coding RNA 1184	NA
ENSG00000170522	ELOVL6	chr4	normal_specific	NA	NA	-0.496184	0.00538323	ELOVL fatty acid elongase 6	Fatty acid elongases (EC 6.2.1.3), such as ELOVL6, use malonyl-CoA as a 2-carbon donor in the first and rate-limiting step of fatty acid elongation (Moon et al., 2001 [PubMed 11567032]).[supplied by OMIM, Mar 2008].
ENSG00000134516	DOCK2	chr5	normal_specific	NA	NA	-0.416493	0.00561211	dedicator of cytokinesis 2	The protein encoded by this gene belongs to the CDM protein family. It is specifically expressed in hematopoietic cells and is predominantly expressed in peripheral blood leukocytes. The protein is involved in remodeling of the actin cytoskeleton required for lymphocyte migration in response to chemokine signaling. It activates members of the Rho family of GTPases, for example RAC1 and RAC2, by a…
ENSG00000166289	PLEKHF1	chr19	normal_specific	NA	NA	-0.251344	0.00561211	pleckstrin homology and FYVE domain containing 1	NA
ENSG00000175463	TBC1D10C	chr11	normal_specific	NA	NA	-0.320972	0.00561211	TBC1 domain family member 10C	The protein encoded by this gene has an N-terminal Rab-GTPase domain and a binding site at the C-terminus for calcineurin, and is an inhibitor of both the Ras signaling pathway and calcineurin, a phosphatase regulated by calcium and calmodulin. Genes encoding similar proteins are located on chromosomes 16 and 22. Multiple transcript variants encoding different isoforms have been found for this ge…
ENSG00000203747	FCGR3A	chr1	normal_specific	NA	NA	-0.498461	0.00562468	Fc fragment of IgG receptor IIIa	This gene encodes a receptor for the Fc portion of immunoglobulin G, and it is involved in the removal of antigen-antibody complexes from the circulation, as well as other other antibody-dependent responses. This gene (FCGR3A) is highly similar to another nearby gene (FCGR3B) located on chromosome 1. The receptor encoded by this gene is expressed on natural killer (NK) cells as an integral membra…
ENSG00000073584	SMARCE1	chr17	normal_specific	NA	NA	0.103069	0.00587155	SWI/SNF related, matrix associated, actin dependent regulator of chromatin, subfamily e, member 1	The protein encoded by this gene is part of the large ATP-dependent chromatin remodeling complex SWI/SNF, which is required for transcriptional activation of genes normally repressed by chromatin. The encoded protein, either alone or when in the SWI/SNF complex, can bind to 4-way junction DNA, which is thought to mimic the topology of DNA as it enters or exits the nucleosome. The protein contains…
ENSG00000197355	UAP1L1	chr9	normal_specific	NA	NA	-0.253701	0.00587155	UDP-N-acetylglucosamine pyrophosphorylase 1 like 1	NA
ENSG00000147168	IL2RG	chrX	normal_specific	NA	NA	-0.47808	0.00589262	interleukin 2 receptor subunit gamma	The protein encoded by this gene is an important signaling component of many interleukin receptors, including those of interleukin -2, -4, -7 and -21, and is thus referred to as the common gamma chain. Mutations in this gene cause X-linked severe combined immunodeficiency (XSCID), as well as X-linked combined immunodeficiency (XCID), a less severe immunodeficiency disorder. [provided by RefSeq, M…
ENSG00000114626	ABTB1	chr3	normal_specific	NA	NA	-0.23609	0.00589453	ankyrin repeat and BTB domain containing 1	This gene encodes a protein with an ankyrin repeat region and two BTB/POZ domains, which are thought to be involved in protein-protein interactions. Expression of this gene is activated by the phosphatase and tensin homolog, a tumor suppressor. Alternate splicing results in three transcript variants. [provided by RefSeq, Mar 2010].
ENSG00000158555	GDPD5	chr11	normal_specific	NA	NA	-0.246361	0.00589453	glycerophosphodiester phosphodiesterase domain containing 5	Glycerophosphodiester phosphodiesterases (GDPDs; EC 3.1.4.46), such as GDPD5, are involved in glycerol metabolism (Lang et al., 2008 [PubMed 17578682]).[supplied by OMIM, Jan 2010].
ENSG00000081059	TCF7	chr5	normal_specific	NA	NA	-0.249491	0.00603659	transcription factor 7	This gene encodes a member of the T-cell factor/lymphoid enhancer-binding factor family of high mobility group (HMG) box transcriptional activators. This gene is expressed predominantly in T-cells and plays a critical role in natural killer cell and innate lymphoid cell development. The encoded protein forms a complex with beta-catenin and activates transcription through a Wnt/beta-catenin signal…
ENSG00000154370	TRIM11	chr1	normal_specific	NA	NA	-0.139913	0.00624565	tripartite motif containing 11	The protein encoded by this gene is a member of the tripartite motif (TRIM) family. The TRIM motif includes three zinc-binding domains, a RING, a B-box type 1 and a B-box type 2, and a coiled-coil region. This protein localizes to the nucleus and the cytoplasm. Its function has not been identified. [provided by RefSeq, Jul 2008].
ENSG00000153207	AHCTF1	chr1	normal_specific	NA	NA	0.112104	0.00626278	AT-hook containing transcription factor 1	NA
ENSG00000137841	PLCB2	chr15	normal_specific	NA	NA	-0.397993	0.00643763	phospholipase C beta 2	The protein encoded by this gene is a phosphodiesterase that catalyzes the hydrolysis of phosphatidylinositol 4,5-bisphosphate to the second messengers inositol 1,4,5-trisphosphate (IP3) and diacylglycerol. The encoded protein is activated by G proteins and has been shown to be involved in the type 2 taste receptor signal transduction pathway. In addition, nuclear factor kappa B can regulate the …
ENSG00000250742	RP11-834C11.4	chr12	normal_specific	NA	NA	-0.280386	0.00657172	long intergenic non-protein coding RNA 2381	NA
ENSG00000146067	FAM193B	chr5	normal_specific	NA	NA	-0.188467	0.00692333	family with sequence similarity 193 member B	NA
ENSG00000026950	BTN3A1	chr6	normal_specific	NA	NA	-0.324643	0.00693108	butyrophilin subfamily 3 member A1	The butyrophilin (BTN) genes are a group of major histocompatibility complex (MHC)-associated genes that encode type I membrane proteins with 2 extracellular immunoglobulin (Ig) domains and an intracellular B30.2 (PRYSPRY) domain. Three subfamilies of human BTN genes are located in the MHC class I region: the single-copy BTN1A1 gene (MIM 601610) and the BTN2 (e.g., BTN2A1; MIM 613590) and BTN3 (e…
ENSG00000130208	APOC1	chr19	normal_specific	NA	NA	-0.486851	0.00693108	apolipoprotein C1	This gene encodes a member of the apolipoprotein C1 family. This gene is expressed primarily in the liver, and it is activated when monocytes differentiate into macrophages. The encoded protein plays a central role in high density lipoprotein (HDL) and very low density lipoprotein (VLDL) metabolism. This protein has also been shown to inhibit cholesteryl ester transfer protein in plasma. A pseudo…
ENSG00000144791	LIMD1	chr3	normal_specific	NA	NA	-0.173046	0.00693108	LIM domains containing 1	NA
ENSG00000177464	GPR4	chr19	normal_specific	NA	NA	0.315998	0.00693137	G protein-coupled receptor 4	NA
ENSG00000213903	LTB4R	chr14	normal_specific	NA	NA	-0.206999	0.00693154	leukotriene B4 receptor	NA
ENSG00000129187	DCTD	chr4	normal_specific	NA	NA	0.119661	0.00694193	dCMP deaminase	The protein encoded by this gene catalyzes the deamination of dCMP to dUMP, the nucleotide substrate for thymidylate synthase. The encoded protein is allosterically activated by dCTP and inhibited by dTTP, and is found as a homohexamer. This protein uses zinc as a cofactor for its activity. Two transcript variants encoding different isoforms have been found for this gene. [provided by RefSeq, Jul…
ENSG00000009790	TRAF3IP3	chr1	normal_specific	NA	NA	-0.448428	0.00703785	TRAF3 interacting protein 3	The gene encodes a protein that mediates cell growth by modulating the c-Jun N-terminal kinase signal transduction pathway. The encoded protein may also interact with a large multi-protein assembly containing the phosphatase 2A catalytic subunit. Alternative splicing results in multiple transcript variants. [provided by RefSeq, Dec 2013].
ENSG00000131791	PRKAB2	chr1	normal_specific	NA	NA	-0.137586	0.0071947	protein kinase AMP-activated non-catalytic subunit beta 2	The protein encoded by this gene is a regulatory subunit of the AMP-activated protein kinase (AMPK). AMPK is a heterotrimer consisting of an alpha catalytic subunit, and non-catalytic beta and gamma subunits. AMPK is an important energy-sensing enzyme that monitors cellular energy status. In response to cellular metabolic stresses, AMPK is activated, and thus phosphorylates and inactivates acetyl…
ENSG00000064547	LPAR2	chr19	normal_specific	NA	NA	-0.150447	0.0072079	lysophosphatidic acid receptor 2	This gene encodes a member of family I of the G protein-coupled receptors, as well as the EDG family of proteins. This protein functions as a lysophosphatidic acid (LPA) receptor and contributes to Ca2+ mobilization, a critical cellular response to LPA in cells, through association with Gi and Gq proteins. An alternative splice variant has been described but its full length sequence has not been …
ENSG00000128815	WDFY4	chr10	normal_specific	NA	NA	-0.494235	0.0072079	WDFY family member 4	NA
ENSG00000175455	CCDC14	chr3	normal_specific	NA	NA	-0.17473	0.0072079	coiled-coil domain containing 14	NA
ENSG00000135439	AGAP2	chr12	normal_specific	NA	NA	-0.35353	0.00727863	ArfGAP with GTPase domain, ankyrin repeat and PH domain 2	The protein encoded by this gene belongs to the centaurin gamma-like family. It mediates anti-apoptotic effects of nerve growth factor by activating nuclear phosphoinositide 3-kinase. It is overexpressed in cancer cells, and promotes cancer cell invasion. Alternatively spliced transcript variants encoding different isoforms have been described for this gene. [provided by RefSeq, Aug 2011].
ENSG00000136250	AOAH	chr7	normal_specific	NA	NA	-0.313305	0.00769061	acyloxyacyl hydrolase	This locus encodes both the light and heavy subunits of acyloxyacyl hydrolase. The encoded enzyme catalyzes the hydrolysis of acyloxylacyl-linked fatty acyl chains from bacterial lipopolysaccharides, effectively detoxifying these molecules. The encoded protein may play a role in modulating host inflammatory response to gram-negative bacteria. Alternatively spliced transcript variants have been de…
ENSG00000169403	PTAFR	chr1	normal_specific	NA	NA	-0.354578	0.00769061	platelet activating factor receptor	This gene encodes a seven-transmembrane G-protein-coupled receptor for platelet-activating factor (PAF) that localizes to lipid rafts and/or caveolae in the cell membrane. PAF (1-0-alkyl-2-acetyl-sn-glycero-3-phosphorylcholine) is a phospholipid that plays a significant role in oncogenic transformation, tumor growth, angiogenesis, metastasis, and pro-inflammatory processes. Binding of PAF to the …
ENSG00000166831	RBPMS2	chr15	normal_specific	NA	NA	0.212553	0.00800811	RNA binding protein, mRNA processing factor 2	The protein encoded by this gene is a member of the RNA recognition motif (RRM)-containing protein family and is involved in the development and dedifferentiation of digestive smooth muscle cells. The encoded protein functions as a homodimer and indirectly inhibits the bone morphogenetic protein pathway. [provided by RefSeq, Aug 2016].
ENSG00000180448	HMHA1	chr19	normal_specific	NA	NA	-0.325282	0.00800811	Rho GTPase activating protein 45	NA
ENSG00000180304	OAZ2	chr15	normal_specific	NA	NA	0.0929178	0.00801259	ornithine decarboxylase antizyme 2	The protein encoded by this gene belongs to the ornithine decarboxylase antizyme family, which plays a role in cell growth and proliferation by regulating intracellular polyamines. Expression of antizymes requires +1 ribosomal frameshifting, which is enhanced by high levels of polyamines. Antizymes in turn bind to and inhibit ornithine decarboxylase (ODC), the key enzyme in polyamine biosynthesis…
ENSG00000110013	SIAE	chr11	normal_specific	NA	NA	0.190794	0.008036	sialic acid acetylesterase	This gene encodes an enzyme which removes 9-O-acetylation modifications from sialic acids. Mutations in this gene are associated with susceptibility to autoimmune disease 6. Multiple transcript variants encoding different isoforms, found either in the cytosol or in the lysosome, have been found for this gene.[provided by RefSeq, Feb 2011].
ENSG00000121281	ADCY7	chr16	normal_specific	NA	NA	-0.380034	0.00807754	adenylate cyclase 7	This gene encodes a membrane-bound adenylate cyclase that catalyses the formation of cyclic AMP from ATP and is inhibitable by calcium. The product of this gene is a member of the adenylyl cyclase class-4/guanylyl cyclase enzyme family that is characterized by the presence of twelve membrane-spanning domains in its sequences. Several transcript variants have been observed for this gene, but the f…
ENSG00000159167	STC1	chr8	normal_specific	NA	NA	0.591804	0.00807754	stanniocalcin 1	This gene encodes a secreted, homodimeric glycoprotein that is expressed in a wide variety of tissues and may have autocrine or paracrine functions. The gene contains a 5' UTR rich in CAG trinucleotide repeats. The encoded protein contains 11 conserved cysteine residues and is phosphorylated by protein kinase C exclusively on its serine residues. The protein may play a role in the regulation of r…
ENSG00000104946	TBC1D17	chr19	normal_specific	NA	NA	-0.141259	0.00813872	TBC1 domain family member 17	NA
ENSG00000106484	MEST	chr7	normal_specific	NA	NA	0.257741	0.00813872	mesoderm specific transcript	This gene encodes a member of the alpha/beta hydrolase superfamily. It is imprinted, exhibiting preferential expression from the paternal allele in fetal tissues, and isoform-specific imprinting in lymphocytes. The loss of imprinting of this gene has been linked to certain types of cancer and may be due to promotor switching. The encoded protein may play a role in development. Alternatively splic…
ENSG00000122882	ECD	chr10	normal_specific	NA	NA	0.1088	0.00813872	ecdysoneless cell cycle regulator	NA
ENSG00000135596	MICAL1	chr6	normal_specific	NA	NA	-0.240475	0.00813872	microtubule associated monooxygenase, calponin and LIM domain containing 1	This gene encodes an enzyme that oxidizes methionine residues on actin, thereby promoting depolymerization of actin filaments. This protein interacts with and regulates signalling by NEDD9/CAS-L (neural precursor cell expressed, developmentally down-regulated 9). Alternative splicing results in multiple transcript variants. [provided by RefSeq, Aug 2015].
ENSG00000149084	HSD17B12	chr11	normal_specific	NA	NA	0.172306	0.00813872	hydroxysteroid 17-beta dehydrogenase 12	This gene encodes a very important 17beta-hydroxysteroid dehydrogenase (17beta-HSD) that converts estrone into estradiol in ovarian tissue. This enzyme is also involved in fatty acid elongation. [provided by RefSeq, Oct 2011].
ENSG00000155659	VSIG4	chrX	normal_specific	NA	NA	-0.551167	0.00813872	V-set and immunoglobulin domain containing 4	This gene encodes a v-set and immunoglobulin-domain containing protein that is structurally related to the B7 family of immune regulatory proteins. The encoded protein may be a negative regulator of T-cell responses. This protein is also a receptor for the complement component 3 fragments C3b and iC3b. Alternate splicing results in multiple transcript variants. [provided by RefSeq, May 2010].
ENSG00000167895	TMC8	chr17	normal_specific	NA	NA	-0.454819	0.00813872	transmembrane channel like 8	Epidermodysplasia verruciformis (EV) is an autosomal recessive dermatosis characterized by abnormal susceptibility to human papillomaviruses (HPVs) and a high rate of progression to squamous cell carcinoma on sun-exposed skin. EV is caused by mutations in either of two adjacent genes located on chromosome 17q25.3. Both of these genes encode integral membrane proteins that localize to the endoplas…
ENSG00000172602	RND1	chr12	normal_specific	NA	NA	0.635987	0.00813872	Rho family GTPase 1	This gene encodes a protein that belongs to the Rho GTPase family. Members of this family regulate the organization of the actin cytoskeleton in response to extracellular growth factors. A similar protein in rat interacts with a microtubule regulator to control axon extension. [provided by RefSeq, Apr 2014].
ENSG00000139194	RBP5	chr12	normal_specific	NA	NA	-0.346273	0.00815938	retinol binding protein 5	The protein encoded by this gene is a cellular retinol-binding protein expressed highly in kidney and liver. Down-regulation of the encoded protein in hepatocellular carcinoma was associated with large tumor size and poor patient survival rates. [provided by RefSeq, Jul 2016].
ENSG00000132965	ALOX5AP	chr13	normal_specific	NA	NA	-0.375112	0.00829711	arachidonate 5-lipoxygenase activating protein	This gene encodes a protein which, with 5-lipoxygenase, is required for leukotriene synthesis. Leukotrienes are arachidonic acid metabolites which have been implicated in various types of inflammatory responses, including asthma, arthritis and psoriasis. This protein localizes to the plasma membrane. Inhibitors of its function impede translocation of 5-lipoxygenase from the cytoplasm to the cell …
ENSG00000140968	IRF8	chr16	normal_specific	NA	NA	-0.407077	0.00829711	interferon regulatory factor 8	Interferon consensus sequence-binding protein (ICSBP) is a transcription factor of the interferon (IFN) regulatory factor (IRF) family. Proteins of this family are composed of a conserved DNA-binding domain in the N-terminal region and a divergent C-terminal region that serves as the regulatory domain. The IRF family proteins bind to the IFN-stimulated response element (ISRE) and regulate express…
ENSG00000090104	RGS1	chr1	normal_specific	NA	NA	-0.582609	0.00833603	regulator of G protein signaling 1	This gene encodes a member of the regulator of G-protein signalling family. This protein is located on the cytosolic side of the plasma membrane and contains a conserved, 120 amino acid motif called the RGS domain. The protein attenuates the signalling activity of G-proteins by binding to activated, GTP-bound G alpha subunits and acting as a GTPase activating protein (GAP), increasing the rate of…
ENSG00000159189	C1QC	chr1	normal_specific	NA	NA	-0.522539	0.00833603	complement C1q C chain	This gene encodes the C-chain polypeptide of serum complement subcomponent C1q, which associates with C1r and C1s to yield the first component of the serum complement system. C1q is composed of 18 polypeptide chains which include 6 A-chains, 6 B-chains, and 6 C-chains. Each chain contains an N-terminal collagen-like region and a C-terminal C1q globular domain. C1q deficiency is associated with lu…
ENSG00000186517	ARHGAP30	chr1	normal_specific	NA	NA	-0.360814	0.00833603	Rho GTPase activating protein 30	NA
ENSG00000161381	PLXDC1	chr17	normal_specific	NA	NA	-0.381973	0.00838519	plexin domain containing 1	NA
ENSG00000163075	CFAP221	chr2	normal_specific	NA	NA	0.260591	0.00863233	cilia and flagella associated protein 221	NA
ENSG00000104331	IMPAD1	chr8	normal_specific	NA	NA	0.123812	0.00877592	3'(2'), 5'-bisphosphate nucleotidase 2	This gene encodes a member of the inositol monophosphatase family. The encoded protein is localized to the Golgi apparatus and catalyzes the hydrolysis of phosphoadenosine phosphate (PAP) to adenosine monophosphate (AMP). Mutations in this gene are a cause of GRAPP type chondrodysplasia with joint dislocations, and a pseudogene of this gene is located on the long arm of chromosome 1. [provided by…
ENSG00000109180	OCIAD1	chr4	normal_specific	NA	NA	0.0945227	0.00877592	OCIA domain containing 1	NA
ENSG00000166888	STAT6	chr12	normal_specific	NA	NA	-0.132637	0.00882649	signal transducer and activator of transcription 6	The protein encoded by this gene is a member of the STAT family of transcription factors. In response to cytokines and growth factors, STAT family members are phosphorylated by the receptor associated kinases, and then form homo- or heterodimers that translocate to the cell nucleus where they act as transcription activators. This protein plays a central role in exerting IL4 mediated biological re…
ENSG00000177575	CD163	chr12	normal_specific	NA	NA	-0.578602	0.00882938	CD163 molecule	The protein encoded by this gene is a member of the scavenger receptor cysteine-rich (SRCR) superfamily, and is exclusively expressed in monocytes and macrophages. It functions as an acute phase-regulated receptor involved in the clearance and endocytosis of hemoglobin/haptoglobin complexes by macrophages, and may thereby protect tissues from free hemoglobin-mediated oxidative damage. This protei…
ENSG00000143434	SEMA6C	chr1	normal_specific	NA	NA	-0.215132	0.00924052	semaphorin 6C	This gene encodes a member of the semaphorin family. Semaphorins represent important molecular signals controlling multiple aspects of the cellular response that follows CNS injury, and thus may play an important role in neural regeneration. [provided by RefSeq, May 2010].
ENSG00000089195	TRMT6	chr20	normal_specific	NA	NA	0.160964	0.00943891	tRNA methyltransferase 6	This gene encodes a member of the tRNA methyltransferase 6 protein family. A similar protein in yeast is part of a two component methyltransferase, which is involved in the posttranslational modification that produces the modified nucleoside 1-methyladenosine in tRNAs. Modified 1-methyladenosine influences initiator methionine stability and may be involved in the replication of human immunodefici…
ENSG00000012822	CALCOCO1	chr12	normal_specific	NA	NA	-0.17472	0.00945457	calcium binding and coiled-coil domain 1	NA
ENSG00000148175	STOM	chr9	normal_specific	NA	NA	0.214994	0.00945457	stomatin	This gene encodes a member of a highly conserved family of integral membrane proteins. The encoded protein localizes to the cell membrane of red blood cells and other cell types, where it may regulate ion channels and transporters. Loss of localization of the encoded protein is associated with hereditary stomatocytosis, a form of hemolytic anemia. There is a pseudogene for this gene on chromosome…
ENSG00000166503	HDGFRP3	chr15	normal_specific	NA	NA	0.120896	0.00945457	HDGF like 3	NA
ENSG00000166927	MS4A7	chr11	normal_specific	NA	NA	-0.412472	0.00949086	membrane spanning 4-domains A7	This gene encodes a member of the membrane-spanning 4A gene family, members of which are characterized by common structural features and similar intron/exon splice boundaries and display unique expression patterns in hematopoietic cells and nonlymphoid tissues. This family member is associated with mature cellular function in the monocytic lineage, and it may be a component of a receptor complex …
ENSG00000127152	BCL11B	chr14	normal_specific	NA	NA	-0.279576	0.00952949	BAF chromatin remodeling complex subunit BCL11B	This gene encodes a C2H2-type zinc finger protein and is closely related to BCL11A, a gene whose translocation may be associated with B-cell malignancies. Although the specific function of this gene has not been determined, the encoded protein is known to be a transcriptional repressor, and is regulated by the NURD nucleosome remodeling and histone deacetylase complex. Four alternatively spliced …
ENSG00000173548	SNX33	chr15	normal_specific	NA	NA	-0.114472	0.00952949	sorting nexin 33	The protein encoded by this gene is involved in cytoskeletal reorganization, vesicle trafficking, endocytosis, and mitosis. The encoded protein is essential for the creation of the cleavage furrow during mitosis and for completion of mitosis. Two transcript variants encoding different isoforms have been found for this gene. [provided by RefSeq, Dec 2015].
ENSG00000122122	SASH3	chrX	normal_specific	NA	NA	-0.41541	0.00957272	SAM and SH3 domain containing 3	The protein encoded by this gene contains a Src homology-3 (SH3) domain and a sterile alpha motif (SAM), both of which are found in proteins involved in cell signaling. This protein may function as a signaling adapter protein in lymphocytes.[provided by RefSeq, Sep 2009].
ENSG00000141385	AFG3L2	chr18	normal_specific	NA	NA	0.139771	0.00957272	AFG3 like matrix AAA peptidase subunit 2	This gene encodes a protein localized in mitochondria and closely related to paraplegin. The paraplegin gene is responsible for an autosomal recessive form of hereditary spastic paraplegia. This gene is a candidate gene for other hereditary spastic paraplegias or neurodegenerative disorders. [provided by RefSeq, Jul 2008].
ENSG00000188042	ARL4C	chr2	normal_specific	NA	NA	-0.346266	0.00957272	ADP ribosylation factor like GTPase 4C	ADP-ribosylation factor-like 4C is a member of the ADP-ribosylation factor family of GTP-binding proteins. ARL4C is closely similar to ARL4A and ARL4D and each has a nuclear localization signal and an unusually high guanine nucleotide exchange rate. This protein may play a role in cholesterol transport. [provided by RefSeq, Jul 2008].
ENSG00000196872	KIAA1211L	chr2	normal_specific	NA	NA	0.200611	0.00957272	CRACD like	NA
ENSG00000180353	HCLS1	chr3	normal_specific	NA	NA	-0.273128	0.00964613	hematopoietic cell-specific Lyn substrate 1	NA
ENSG00000005175	RPAP3	chr12	normal_specific	NA	NA	0.106102	0.0096583	RNA polymerase II associated protein 3	This gene encodes an RNA polymerase II-associated protein. The encoded protein may function in transcriptional regulation and may also regulate apoptosis. Alternatively spliced transcript variants have been described. [provided by RefSeq, Mar 2009].
ENSG00000173200	PARP15	chr3	normal_specific	NA	NA	-0.465767	0.00977126	poly(ADP-ribose) polymerase family member 15	PARP15 is a macrodomain-containing transcriptional repressor with poly(ADP-ribose) polymerase activity (Aguiar et al., 2005 [PubMed 16061477]).[supplied by OMIM, May 2008].
ENSG00000101463	SYNDIG1	chr20	normal_specific	NA	NA	0.287787	0.0098307	synapse differentiation inducing 1	This gene encodes a protein that belongs to the interferon-induced transmembrane family of proteins. A similar protein in rat is thought to regulate the development of excitatory synapses. [provided by RefSeq, Jul 2013].
ENSG00000106462	EZH2	chr7	normal_specific	NA	NA	-0.206882	0.0098307	enhancer of zeste 2 polycomb repressive complex 2 subunit	This gene encodes a member of the Polycomb-group (PcG) family. PcG family members form multimeric protein complexes, which are involved in maintaining the transcriptional repressive state of genes over successive cell generations. This protein associates with the embryonic ectoderm development protein, the VAV1 oncoprotein, and the X-linked nuclear protein. This protein may play a role in the hem…
ENSG00000131873	CHSY1	chr15	normal_specific	NA	NA	0.205619	0.0098307	chondroitin sulfate synthase 1	This gene encodes a member of the chondroitin N-acetylgalactosaminyltransferase family. These enzymes possess dual glucuronyltransferase and galactosaminyltransferase activity and play critical roles in the biosynthesis of chondroitin sulfate, a glycosaminoglycan involved in many biological processes including cell proliferation and morphogenesis. Decreased expression of this gene may play a role…
ENSG00000173068	BNC2	chr9	normal_specific	NA	NA	-0.277937	0.00985256	basonuclin 2	This gene encodes a conserved zinc finger protein. The encoded protein functions in skin color saturation. Mutations in this gene are associated with facial pigmented spots. This gene is also associated with susceptibility to adolescent idiopathic scoliosis. [provided by RefSeq, Jul 2016].
ENSG00000204370	SDHD	chr11	normal_specific	NA	NA	0.125728	0.00985256	succinate dehydrogenase complex subunit D	This gene encodes a member of complex II of the respiratory chain, which is responsible for the oxidation of succinate. The encoded protein is one of two integral membrane proteins anchoring the complex to the matrix side of the mitochondrial inner membrane. Mutations in this gene are associated with the formation of tumors, including hereditary paraganglioma. Transmission of disease occurs almos…
ENSG00000156026	MCU	chr10	normal_specific	NA	NA	-0.133963	0.00991866	mitochondrial calcium uniporter	This gene encodes a calcium transporter that localizes to the mitochondrial inner membrane. The encoded protein interacts with mitochondrial calcium uptake 1. Alternative splicing results in multiple transcript variants. [provided by RefSeq, Jul 2012].
ENSG00000105483	CARD8	chr19	normal_specific	NA	NA	-0.166954	0.0102294	caspase recruitment domain family member 8	The protein encoded by this gene belongs to the caspase recruitment domain (CARD)-containing family of proteins, which are involved in pathways leading to activation of caspases or nuclear factor kappa-B (NFKB). This protein may be a component of the inflammasome, a protein complex that plays a role in the activation of proinflammatory caspases. It is thought that this protein acts as an adaptor …
ENSG00000125827	TMX4	chr20	normal_specific	NA	NA	0.119417	0.0102518	thioredoxin related transmembrane protein 4	This gene encodes a member of the disulfide isomerase (PDI) family of endoplasmic reticulum (ER) proteins that catalyze protein folding and thiol-disulfide interchange reactions. The encoded protein has an N-terminal ER-signal sequence, a catalytically active thioredoxin domain, one transmembrane domain and C-terminal ASP/GLU-rich calcium binding domain. Unlike most members of this gene family, i…
ENSG00000141642	ELAC1	chr18	normal_specific	NA	NA	0.146898	0.0102518	elaC ribonuclease Z 1	NA
ENSG00000072778	ACADVL	chr17	normal_specific	NA	NA	-0.211557	0.0102728	acyl-CoA dehydrogenase very long chain	The protein encoded by this gene is targeted to the inner mitochondrial membrane where it catalyzes the first step of the mitochondrial fatty acid beta-oxidation pathway. This acyl-Coenzyme A dehydrogenase is specific to long-chain and very-long-chain fatty acids. A deficiency in this gene product reduces myocardial fatty acid beta-oxidation and is associated with cardiomyopathy. Alternative spli…
ENSG00000204536	CCHCR1	chr6	normal_specific	NA	NA	-0.135749	0.0105567	coiled-coil alpha-helical rod protein 1	This gene encodes a protein with five coiled-coil alpha-helical rod domains that is thought to act as a regulator of mRNA metabolism through its interaction with mRNA-decapping protein 4. It localizes to P-bodies, the site of mRNA metabolism, with an N-terminus that is required for this subcellular localization, suggesting it is a P-body component. Naturally occurring mutations in this gene are a…
ENSG00000107949	BCCIP	chr10	normal_specific	NA	NA	0.114088	0.0105972	BRCA2 and CDKN1A interacting protein	This gene product was isolated on the basis of its interaction with BRCA2 and p21 proteins. It is an evolutionarily conserved nuclear protein with multiple interacting domains. The N-terminal half shares moderate homology with regions of calmodulin and M-calpain, suggesting that it may also bind calcium. Functional studies indicate that this protein may be an important cofactor for BRCA2 in tumor…
ENSG00000145016	KIAA0226	chr3	normal_specific	NA	NA	-0.130098	0.0105972	rubicon autophagy regulator	The protein encoded by this gene is a negative regulator of autophagy and endocytic trafficking and controls endosome maturation. This protein contains two conserved domains, an N-terminal RUN domain and a C-terminal DUF4206 domain. The RUN domain is involved in Ras-like GTPase signaling, and the DUF4206 domain contains a diacylglycerol (DAG) binding-like motif. Mutation in this gene results in d…
ENSG00000168734	PKIG	chr20	normal_specific	NA	NA	0.12334	0.0105972	cAMP-dependent protein kinase inhibitor gamma	This gene encodes a member of the protein kinase inhibitor family. Studies of a similar protein in mice suggest that this protein acts as a potent competitive cAMP-dependent protein kinase inhibitor, and is a predominant form of inhibitor in various tissues. The encoded protein may be involved in osteogenesis. Alternative splicing results in multiple transcript variants. [provided by RefSeq, Jul …
ENSG00000213341	CHUK	chr10	normal_specific	NA	NA	0.132493	0.0105972	component of inhibitor of nuclear factor kappa B kinase complex	This gene encodes a member of the serine/threonine protein kinase family. The encoded protein, a component of a cytokine-activated protein complex that is an inhibitor of the essential transcription factor NF-kappa-B complex, phosphorylates sites that trigger the degradation of the inhibitor via the ubiquination pathway, thereby activating the transcription factor. [provided by RefSeq, Jul 2008].
ENSG00000175348	TMEM9B	chr11	normal_specific	NA	NA	0.114129	0.0106048	TMEM9 domain family member B	NA
ENSG00000040531	CTNS	chr17	normal_specific	NA	NA	-0.12697	0.0106302	cystinosin, lysosomal cystine transporter	This gene encodes a seven-transmembrane domain protein that functions to transport cystine out of lysosomes. Its activity is driven by the H+ electrochemical gradient of the lysosomal membrane. Mutations in this gene cause cystinosis, a lysosomal storage disorder. Alternative splicing results in multiple transcript variants. [provided by RefSeq, Jul 2009].
ENSG00000165359	DDX26B	chrX	normal_specific	NA	NA	-0.166522	0.0107635	integrator complex subunit 6 like	NA
ENSG00000185133	INPP5J	chr22	normal_specific	NA	NA	0.224158	0.0108042	inositol polyphosphate-5-phosphatase J	NA
ENSG00000198843	SELT	chr3	normal_specific	NA	NA	0.105833	0.0108042	selenoprotein T	This gene encodes a selenoprotein, containing a selenocysteine (Sec) residue at the active site. Sec is encoded by the UGA codon that normally signals translation termination. The 3' UTRs of selenoprotein mRNAs contain a conserved stem-loop structure, the Sec insertion sequence (SECIS) element, that is necessary for the recognition of UGA as a Sec codon rather than as a stop signal. This protein …
ENSG00000123329	ARHGAP9	chr12	normal_specific	NA	NA	-0.421256	0.0108116	Rho GTPase activating protein 9	This gene encodes a member of the Rho-GAP family of GTPase activating proteins. The protein has substantial GAP activity towards several Rho-family GTPases in vitro, converting them to an inactive GDP-bound state. It is implicated in regulating adhesion of hematopoietic cells to the extracellular matrix. Multiple transcript variants encoding different isoforms have been found for this gene. [prov…
ENSG00000165168	CYBB	chrX	normal_specific	NA	NA	-0.422429	0.0108116	cytochrome b-245 beta chain	Cytochrome b (-245) is composed of cytochrome b alpha (CYBA) and beta (CYBB) chain. It has been proposed as a primary component of the microbicidal oxidase system of phagocytes. CYBB deficiency is one of five described biochemical defects associated with chronic granulomatous disease (CGD). In this disorder, there is decreased activity of phagocyte NADPH oxidase; neutrophils are able to phagocyti…
ENSG00000104081	BMF	chr15	normal_specific	NA	NA	-0.295397	0.0109288	Bcl2 modifying factor	The protein encoded by this gene belongs to the BCL2 protein family. BCL2 family members form hetero- or homodimers and act as anti- or pro-apoptotic regulators that are involved in a wide variety of cellular activities. This protein contains a single BCL2 homology domain 3 (BH3), and has been shown to bind BCL2 proteins and function as an apoptotic activator. This protein is found to be sequeste…
ENSG00000115325	DOK1	chr2	normal_specific	NA	NA	-0.138444	0.0109288	docking protein 1	The protein encoded by this gene is part of a signal transduction pathway downstream of receptor tyrosine kinases. The encoded protein is a scaffold protein that helps form a platform for the assembly of multiprotein signaling complexes. Several transcript variants encoding different isoforms have been found for this gene. [provided by RefSeq, Jan 2016].
ENSG00000079387	SENP1	chr12	normal_specific	NA	NA	0.0898223	0.0114364	SUMO specific peptidase 1	This gene encodes a cysteine protease that specifically targets members of the small ubiquitin-like modifier (SUMO) protein family. This protease regulates SUMO pathways by deconjugating sumoylated proteins. This protease also functions to process the precursor SUMO proteins into their mature form. Alternate splicing results in multiple transcript variants. [provided by RefSeq, Jun 2012].
ENSG00000004897	CDC27	chr17	normal_specific	NA	NA	0.129938	0.0114692	cell division cycle 27	The protein encoded by this gene shares strong similarity with Saccharomyces cerevisiae protein Cdc27, and the gene product of Schizosaccharomyces pombe nuc 2. This protein is a component of the anaphase-promoting complex (APC), which is composed of eight protein subunits and is highly conserved in eukaryotic cells. This complex catalyzes the formation of cyclin B-ubiquitin conjugate, which is re…
ENSG00000140939	NOL3	chr16	normal_specific	NA	NA	-0.159058	0.0114692	nucleolar protein 3	This gene encodes an anti-apoptotic protein that has been shown to down-regulate the enzyme activities of caspase 2, caspase 8 and tumor protein p53. Multiple transcript variants encoding different isoforms have been found for this gene. [provided by RefSeq, Jun 2010].
ENSG00000138279	ANXA7	chr10	normal_specific	NA	NA	0.0985816	0.0115251	annexin A7	Annexin VII is a member of the annexin family of calcium-dependent phospholipid binding proteins.The Annexin VII gene contains 14 exons and spans approximately 34 kb of DNA. An alternatively spliced cassette exon results in two mRNA transcripts of 2.0 and 2.4 kb which are predicted to generate two protein isoforms differing in their N-terminal domain. The alternative splicing event is tissue spec…
ENSG00000175137	SH3BP5L	chr1	normal_specific	NA	NA	-0.115423	0.0115381	SH3 binding domain protein 5 like	NA
ENSG00000104894	CD37	chr19	normal_specific	NA	NA	-0.418755	0.0117728	CD37 molecule	The protein encoded by this gene is a member of the transmembrane 4 superfamily, also known as the tetraspanin family. Most of these members are cell-surface proteins that are characterized by the presence of four hydrophobic domains. The proteins mediate signal transduction events that play a role in the regulation of cell development, activation, growth and motility. This encoded protein is a c…
ENSG00000197535	MYO5A	chr15	normal_specific	NA	NA	-0.120964	0.0117728	myosin VA	This gene is one of three myosin V heavy-chain genes, belonging to the myosin gene superfamily. Myosin V is a class of actin-based motor proteins involved in cytoplasmic vesicle transport and anchorage, spindle-pole alignment and mRNA translocation. The protein encoded by this gene is abundant in melanocytes and nerve cells. Mutations in this gene cause Griscelli syndrome type-1 (GS1), Griscelli …
ENSG00000182752	PAPPA	chr9	normal_specific	NA	NA	0.457339	0.01184	pappalysin 1	This gene encodes a secreted metalloproteinase which cleaves insulin-like growth factor binding proteins (IGFBPs). Following IGFBP cleavage, insulin growth factors dissociate from IGFBPs and bind to IGF receptors, resulting in activation of the IGF pathway. The encoded protein plays a role in bone formation, inflammation, wound healing and female fertility. Enhanced expression of this protein is …
ENSG00000115946	PNO1	chr2	normal_specific	NA	NA	0.206427	0.0119416	partner of NOB1 homolog	NA
ENSG00000128309	MPST	chr22	normal_specific	NA	NA	-0.15265	0.0119988	mercaptopyruvate sulfurtransferase	This protein encoded by this gene catalyzes the transfer of a sulfur ion from 3-mercaptopyruvate to cyanide or other thiol compounds. It may be involved in cysteine degradation and cyanide detoxification. There is confusion in literature between this protein (mercaptopyruvate sulfurtransferase, MPST), which appears to be cytoplasmic, and thiosulfate sulfurtransferase (rhodanese, TST, GeneID:7263)…
ENSG00000198879	SFMBT2	chr10	normal_specific	NA	NA	-0.22123	0.0121614	Scm like with four mbt domains 2	NA
ENSG00000197780	TAF13	chr1	normal_specific	NA	NA	0.151648	0.0124702	TATA-box binding protein associated factor 13	Initiation of transcription by RNA polymerase II requires the activities of more than 70 polypeptides. The protein that coordinates these activities is transcription factor IID (TFIID), which binds to the core promoter to position the polymerase properly, serves as the scaffold for assembly of the remainder of the transcription complex, and acts as a channel for regulatory signals. TFIID is compo…
ENSG00000117461	PIK3R3	chr1	normal_specific	NA	NA	0.259325	0.0125444	phosphoinositide-3-kinase regulatory subunit 3	Phosphatidylinositol 3-kinase (PI3K) phosphorylates phosphatidylinositol and similar compounds, which then serve as second messengers in growth signaling pathways. PI3K is composed of a catalytic and a regulatory subunit. The protein encoded by this gene represents a regulatory subunit of PI3K. The encoded protein contains two SH2 domains through which it binds activated protein tyrosine kinases …
ENSG00000083635	NUFIP1	chr13	normal_specific	NA	NA	0.123296	0.0127079	nuclear FMR1 interacting protein 1	This gene encodes a nuclear RNA binding protein that contains a C2H2 zinc finger motif and a nuclear localization signal. This protein is associated with the nuclear matrix in perichromatin fibrils and, in neurons, localizes to the cytoplasm in association with endoplasmic reticulum ribosomes. This protein interacts with the fragile X mental retardation protein (FMRP), the tumor suppressor protei…
ENSG00000116199	FAM20B	chr1	normal_specific	NA	NA	0.0862054	0.0127079	FAM20B glycosaminoglycan xylosylkinase	NA
ENSG00000135838	NPL	chr1	normal_specific	NA	NA	-0.228979	0.0127079	N-acetylneuraminate pyruvate lyase	This gene encodes a member of the N-acetylneuraminate lyase sub-family of (beta/alpha)(8)-barrel enzymes. N-acetylneuraminate lyases regulate cellular concentrations of N-acetyl-neuraminic acid (sialic acid) by mediating the reversible conversion of sialic acid into N-acetylmannosamine and pyruvate. A pseudogene of this gene is located on the short arm of chromosome 2. Alternatively spliced trans…
ENSG00000169139	UBE2V2	chr8	normal_specific	NA	NA	0.0893231	0.0127079	ubiquitin conjugating enzyme E2 V2	Ubiquitin-conjugating enzyme E2 variant proteins constitute a distinct subfamily within the E2 protein family. They have sequence similarity to other ubiquitin-conjugating enzymes but lack the conserved cysteine residue that is critical for the catalytic activity of E2s. The protein encoded by this gene also shares homology with ubiquitin-conjugating enzyme E2 variant 1 and yeast MMS2 gene produc…
ENSG00000188021	UBQLN2	chrX	normal_specific	NA	NA	0.111477	0.0127178	ubiquilin 2	This gene encodes an ubiquitin-like protein (ubiquilin) that shares high degree of similarity with related products in yeast, rat and frog. Ubiquilins contain a N-terminal ubiquitin-like domain and a C-terminal ubiquitin-associated domain. They physically associate with both proteasomes and ubiquitin ligases; and thus, are thought to functionally link the ubiquitination machinery to the proteasom…
ENSG00000139505	MTMR6	chr13	normal_specific	NA	NA	0.0946961	0.012728	myotubularin related protein 6	NA
ENSG00000110057	UNC93B1	chr11	normal_specific	NA	NA	-0.156249	0.0128767	unc-93 homolog B1, TLR signaling regulator	This gene encodes a protein that is involved in innate and adaptive immune response by regulating toll-like receptor signaling. The encoded protein traffics nucleotide sensing toll-like receptors to the endolysosome from the endoplasmic reticulum. Deficiency of the encoded protein has been associated with herpes simplex encephalitis. [provided by RefSeq, Feb 2014].
ENSG00000198821	CD247	chr1	normal_specific	NA	NA	-0.366537	0.0128767	CD247 molecule	The protein encoded by this gene is T-cell receptor zeta, which together with T-cell receptor alpha/beta and gamma/delta heterodimers, and with CD3-gamma, -delta and -epsilon, forms the T-cell receptor-CD3 complex. The zeta chain plays an important role in coupling antigen recognition to several intracellular signal-transduction pathways. Low expression of the antigen results in impaired immune r…
ENSG00000115232	ITGA4	chr2	normal_specific	NA	NA	-0.366767	0.0129769	integrin subunit alpha 4	The gene encodes a member of the integrin alpha chain family of proteins. Integrins are heterodimeric integral membrane proteins composed of an alpha chain and a beta chain that function in cell surface adhesion and signaling. The encoded preproprotein is proteolytically processed to generate light and heavy chains that comprise the alpha 4 subunit. This subunit associates with a beta 1 or beta 7…
ENSG00000198612	COPS8	chr2	normal_specific	NA	NA	0.0860808	0.01332	COP9 signalosome subunit 8	The protein encoded by this gene is one of the eight subunits of COP9 signalosome, a highly conserved protein complex that functions as an important regulator in multiple signaling pathways. The structure and function of COP9 signalosome is similar to that of the 19S regulatory particle of 26S proteasome. COP9 signalosome has been shown to interact with SCF-type E3 ubiquitin ligases and act as a …
ENSG00000054282	SDCCAG8	chr1	normal_specific	NA	NA	0.093263	0.013399	SHH signaling and ciliogenesis regulator SDCCAG8	This gene encodes a centrosome associated protein. This protein may be involved in organizing the centrosome during interphase and mitosis. Mutations in this gene are associated with retinal-renal ciliopathy. [provided by RefSeq, Oct 2010].
ENSG00000171792	RHNO1	chr12	normal_specific	NA	NA	0.128042	0.0135062	RAD9-HUS1-RAD1 interacting nuclear orphan 1	NA
ENSG00000100916	BRMS1L	chr14	normal_specific	NA	NA	0.110431	0.0137366	BRMS1 like transcriptional repressor	The protein encoded by this gene shows sequence similarity to the human breast carcinoma metastasis suppressor (BRMS1) protein and the mammalian Sds3 (suppressor of defective silencing 3) proteins. This protein is a component of the mSin3a family of histone deacetylase complexes (HDAC). [provided by RefSeq, Jul 2008].
ENSG00000079101	CLUL1	chr18	normal_specific	NA	NA	0.307494	0.0143745	clusterin like 1	NA
ENSG00000182578	CSF1R	chr5	normal_specific	NA	NA	-0.408707	0.0143745	colony stimulating factor 1 receptor	The protein encoded by this gene is the receptor for colony stimulating factor 1, a cytokine which controls the production, differentiation, and function of macrophages. This receptor mediates most if not all of the biological effects of this cytokine. Ligand binding activates the receptor kinase through a process of oligomerization and transphosphorylation. The encoded protein is a tyrosine kina…
ENSG00000105664	COMP	chr19	normal_specific	NA	NA	-0.702728	0.0143872	cartilage oligomeric matrix protein	The protein encoded by this gene is a noncollagenous extracellular matrix (ECM) protein. It consists of five identical glycoprotein subunits, each with EGF-like and calcium-binding (thrombospondin-like) domains. Oligomerization results from formation of a five-stranded coiled coil and disulfides. Binding to other ECM proteins such as collagen appears to depend on divalent cations. Contraction or …
ENSG00000162645	GBP2	chr1	normal_specific	NA	NA	-0.301535	0.0144559	guanylate binding protein 2	This gene belongs to the guanine-binding protein (GBP) family, which includes interferon-induced proteins that can bind to guanine nucleotides (GMP, GDP and GTP). The encoded protein is a GTPase which hydrolyzes GTP, predominantly to GDP. The protein may play a role as a marker of squamous cell carcinomas. [provided by RefSeq, Jul 2013].
ENSG00000101871	MID1	chrX	normal_specific	NA	NA	0.152844	0.014557	midline 1	The protein encoded by this gene is a member of the tripartite motif (TRIM) family, also known as the 'RING-B box-coiled coil' (RBCC) subgroup of RING finger proteins. The TRIM motif includes three zinc-binding domains, a RING, a B-box type 1 and a B-box type 2, and a coiled-coil region. This protein forms homodimers which associate with microtubules in the cytoplasm. The protein is likely involv…
ENSG00000182552	RWDD4	chr4	normal_specific	NA	NA	0.0945223	0.0149242	RWD domain containing 4	NA
ENSG00000064999	ANKS1A	chr6	normal_specific	NA	NA	-0.155446	0.0150964	ankyrin repeat and sterile alpha motif domain containing 1A	NA
ENSG00000138463	DIRC2	chr3	normal_specific	NA	NA	0.120074	0.0151047	solute carrier family 49 member 4	This gene encodes a membrane-bound protein from the major facilitator superfamily of transporters. Disruption of this gene by translocation has been associated with haplo-insufficiency and renal cell carcinomas. Alternatively spliced transcript variants have been described, but their biological validity has not yet been determined. [provided by RefSeq, Jul 2008].
ENSG00000163521	GLB1L	chr2	normal_specific	NA	NA	0.142867	0.0151047	galactosidase beta 1 like	NA
ENSG00000111801	BTN3A3	chr6	normal_specific	NA	NA	-0.253981	0.0151505	butyrophilin subfamily 3 member A3	The butyrophilin (BTN) genes are a group of major histocompatibility complex (MHC)-associated genes that encode type I membrane proteins with 2 extracellular immunoglobulin (Ig) domains and an intracellular B30.2 (PRYSPRY) domain. Three subfamilies of human BTN genes are located in the MHC class I region: the single-copy BTN1A1 gene (MIM 601610) and the BTN2 (e.g., BTN2A1; MIM 613590) and BTN3 (e…
ENSG00000102879	CORO1A	chr16	normal_specific	NA	NA	-0.372351	0.0152174	coronin 1A	This gene encodes a member of the WD repeat protein family. WD repeats are minimally conserved regions of approximately 40 amino acids typically bracketed by gly-his and trp-asp (GH-WD), which may facilitate formation of heterotrimeric or multiprotein complexes. Members of this family are involved in a variety of cellular processes, including cell cycle progression, signal transduction, apoptosis…
ENSG00000111196	MAGOHB	chr12	normal_specific	NA	NA	0.111273	0.0153287	mago homolog B, exon junction complex subunit	NA
ENSG00000072415	MPP5	chr14	normal_specific	NA	NA	0.112341	0.0154495	membrane palmitoylated protein 5	This gene encodes a member of the p55-like subfamily of the membrane-associated guanylate kinase (MAGUK) gene superfamily. The encoded protein participates in the polarization of differentiating cells, has been shown to regulate myelinating Schwann cells (PMID: 20237282), and is one of the components of the Crumbs complex in the retina. Mice which express lower levels of the orthologous protein h…
ENSG00000163803	PLB1	chr2	normal_specific	NA	NA	-0.411399	0.0155857	phospholipase B1	This gene encodes a membrane-associated phospholipase that displays lysophospholipase and phospholipase A2 activities through removal of sn-1 and sn-2 fatty acids of glycerophospholipids. In addition, it displays lipase and retinyl ester hydrolase activities. The encoded protein is highly conserved and is composed of a large, glycosylated extracellular domain composed of four tandem homologous do…
ENSG00000104738	MCM4	chr8	normal_specific	NA	NA	0.14428	0.016134	minichromosome maintenance complex component 4	The protein encoded by this gene is one of the highly conserved mini-chromosome maintenance proteins (MCM) that are essential for the initiation of eukaryotic genome replication. The hexameric protein complex formed by MCM proteins is a key component of the pre-replication complex (pre_RC) and may be involved in the formation of replication forks and in the recruitment of other DNA replication re…
ENSG00000113597	TRAPPC13	chr5	normal_specific	NA	NA	0.0970425	0.016134	trafficking protein particle complex 13	NA
ENSG00000136167	LCP1	chr13	normal_specific	NA	NA	-0.34099	0.016134	lymphocyte cytosolic protein 1	Plastins are a family of actin-binding proteins that are conserved throughout eukaryote evolution and expressed in most tissues of higher eukaryotes. In humans, two ubiquitous plastin isoforms (L and T) have been identified. Plastin 1 (otherwise known as Fimbrin) is a third distinct plastin isoform which is specifically expressed at high levels in the small intestine. The L isoform is expressed o…
ENSG00000158201	ABHD3	chr18	normal_specific	NA	NA	-0.232565	0.016134	abhydrolase domain containing 3, phospholipase	This gene encodes a protein containing an alpha/beta hydrolase fold, which is a catalytic domain found in a very wide range of enzymes. The function of this protein has not been determined. [provided by RefSeq, Jul 2008].
ENSG00000160209	PDXK	chr21	normal_specific	NA	NA	-0.166795	0.016134	pyridoxal kinase	The protein encoded by this gene phosphorylates vitamin B6, a step required for the conversion of vitamin B6 to pyridoxal-5-phosphate, an important cofactor in intermediary metabolism. The encoded protein is cytoplasmic and probably acts as a homodimer. Alternatively spliced transcript variants have been described, but their biological validity has not been determined. [provided by RefSeq, Jul 20…
ENSG00000160883	HK3	chr5	normal_specific	NA	NA	-0.395885	0.016134	hexokinase 3	Hexokinases phosphorylate glucose to produce glucose-6-phosphate, the first step in most glucose metabolism pathways. This gene encodes hexokinase 3. Similar to hexokinases 1 and 2, this allosteric enzyme is inhibited by its product glucose-6-phosphate. [provided by RefSeq, Apr 2009].
ENSG00000166923	GREM1	chr15	normal_specific	NA	NA	-0.693211	0.016134	gremlin 1, DAN family BMP antagonist	This gene encodes a member of the BMP (bone morphogenic protein) antagonist family. Like BMPs, BMP antagonists contain cystine knots and typically form homo- and heterodimers. The CAN (cerberus and dan) subfamily of BMP antagonists, to which this gene belongs, is characterized by a C-terminal cystine knot with an eight-membered ring. The antagonistic effect of the secreted glycosylated protein en…
ENSG00000184905	TCEAL2	chrX	normal_specific	NA	NA	0.217977	0.016134	transcription elongation factor A like 2	This gene encodes a member of the transcription elongation factor A (SII)-like (TCEAL) gene family. Members of this family contain TFA domains and may function as nuclear phosphoproteins that modulate transcription in a promoter context-dependent manner. Multiple family members are located on the X chromosome. [provided by RefSeq, Jul 2008].
ENSG00000188938	FAM120AOS	chr9	normal_specific	NA	NA	0.102469	0.016134	family with sequence similarity 120A opposite strand	Differences in the expression level of this gene are associated with the survival rate of those with glioma. [provided by RefSeq, May 2017].
ENSG00000018280	SLC11A1	chr2	normal_specific	NA	NA	-0.39944	0.0164279	solute carrier family 11 member 1	This gene is a member of the solute carrier family 11 (proton-coupled divalent metal ion transporters) family and encodes a multi-pass membrane protein. The protein functions as a divalent transition metal (iron and manganese) transporter involved in iron metabolism and host resistance to certain pathogens. Mutations in this gene have been associated with susceptibility to infectious diseases suc…
ENSG00000089050	RBBP9	chr20	normal_specific	NA	NA	0.14724	0.0164279	RB binding protein 9, serine hydrolase	The protein encoded by this gene is a retinoblastoma binding protein that may play a role in the regulation of cell proliferation and differentiation. Two alternatively spliced transcript variants of this gene with identical predicted protein products have been reported, one of which is a nonsense-mediated decay candidate. [provided by RefSeq, Jul 2008].
ENSG00000112297	AIM1	chr6	normal_specific	NA	NA	-0.157387	0.0164279	crystallin beta-gamma domain containing 1	NA
ENSG00000151651	ADAM8	chr10	normal_specific	NA	NA	-0.223885	0.0166443	ADAM metallopeptidase domain 8	This gene encodes a member of the ADAM (a disintegrin and metalloprotease domain) family. Members of this family are membrane-anchored proteins structurally related to snake venom disintegrins, and have been implicated in a variety of biological processes involving cell-cell and cell-matrix interactions, including fertilization, muscle development, and neurogenesis. The protein encoded by this ge…
ENSG00000177679	SRRM3	chr7	normal_specific	NA	NA	-0.248448	0.016737	serine/arginine repetitive matrix 3	NA
ENSG00000081320	STK17B	chr2	normal_specific	NA	NA	-0.250813	0.0167919	serine/threonine kinase 17b	NA
ENSG00000119927	GPAM	chr10	normal_specific	NA	NA	-0.334582	0.0168001	glycerol-3-phosphate acyltransferase, mitochondrial	This gene encodes a mitochondrial enzyme which prefers saturated fatty acids as its substrate for the synthesis of glycerolipids. This metabolic pathway's first step is catalyzed by the encoded enzyme. Two forms for this enzyme exist, one in the mitochondria and one in the endoplasmic reticulum. Two alternatively spliced transcript variants have been described for this gene. [provided by RefSeq, …
ENSG00000205744	DENND1C	chr19	normal_specific	NA	NA	-0.323668	0.0168374	DENN domain containing 1C	The protein encoded by this gene functions as a guanine nucleotide exchange factor for the early endosomal small GTPase RAB35, which regulates endosomal membrane trafficking and is involved in actin polymerization. The encoded protein activates RAB35 by promoting the exchange of RAB35-bound GDP for GTP. This gene may play a role in linking RAB35 activation with the clathrin machinery. [provided b…
ENSG00000110079	MS4A4A	chr11	normal_specific	NA	NA	-0.472732	0.0169041	membrane spanning 4-domains A4A	This gene encodes a member of the membrane-spanning 4A gene family. Members of this nascent protein family are characterized by common structural features, similar intron/exon splice boundaries, and display unique expression patterns in hematopoietic cells and nonlymphoid tissues. Alternatively spliced transcript variants encoding different isoforms have been found for this gene. [provided by Ref…
ENSG00000148841	ITPRIP	chr10	normal_specific	NA	NA	0.213142	0.0173518	inositol 1,4,5-trisphosphate receptor interacting protein	This gene encodes a membrane-associated protein that binds the inositol 1,4,5-trisphosphate receptor (ITPR). The encoded protein enhances the sensitivity of ITPR to intracellular calcium signaling. Alternative splicing results in multiple transcript variants. [provided by RefSeq, Dec 2012].
ENSG00000198015	MRPL42	chr12	normal_specific	NA	NA	0.0903297	0.0174352	mitochondrial ribosomal protein L42	Mammalian mitochondrial ribosomal proteins are encoded by nuclear genes and help in protein synthesis within the mitochondrion. Mitochondrial ribosomes (mitoribosomes) consist of a small 28S subunit and a large 39S subunit. They have an estimated 75% protein to rRNA composition compared to prokaryotic ribosomes, where this ratio is reversed. Another difference between mammalian mitoribosomes and …
ENSG00000082512	TRAF5	chr1	normal_specific	NA	NA	-0.256308	0.017441	TNF receptor associated factor 5	The scaffold protein encoded by this gene is a member of the tumor necrosis factor receptor-associated factor (TRAF) protein family and contains a meprin and TRAF homology (MATH) domain, a RING-type zinc finger, and two TRAF-type zinc fingers. TRAF proteins are associated with, and mediate signal transduction from members of the TNF receptor superfamily. This protein is one of the components of a…
ENSG00000109107	ALDOC	chr17	normal_specific	NA	NA	-0.211104	0.017441	aldolase, fructose-bisphosphate C	This gene encodes a member of the class I fructose-biphosphate aldolase gene family. Expressed specifically in the hippocampus and Purkinje cells of the brain, the encoded protein is a glycolytic enzyme that catalyzes the reversible aldol cleavage of fructose-1,6-biphosphate and fructose 1-phosphate to dihydroxyacetone phosphate and either glyceraldehyde-3-phosphate or glyceraldehyde, respectivel…
ENSG00000169255	B3GALNT1	chr3	normal_specific	NA	NA	0.171195	0.017441	beta-1,3-N-acetylgalactosaminyltransferase 1 (globoside blood group)	This gene is a member of the beta-1,3-galactosyltransferase (beta3GalT) gene family. This family encodes type II membrane-bound glycoproteins with diverse enzymatic functions using different donor substrates (UDP-galactose and UDP-N-acetylglucosamine) and different acceptor sugars (N-acetylglucosamine, galactose, N-acetylgalactosamine). The beta3GalT genes are distantly related to the Drosophila …
ENSG00000138138	ATAD1	chr10	normal_specific	NA	NA	0.0859366	0.0176095	ATPase family AAA domain containing 1	NA
ENSG00000181788	SIAH2	chr3	normal_specific	NA	NA	-0.151736	0.0177233	siah E3 ubiquitin protein ligase 2	This gene encodes a protein that is a member of the seven in absentia homolog (SIAH) family. The protein is an E3 ligase and is involved in ubiquitination and proteasome-mediated degradation of specific proteins. The activity of this ubiquitin ligase has been implicated in regulating cellular response to hypoxia. [provided by RefSeq, Jul 2008].
ENSG00000100055	CYTH4	chr22	normal_specific	NA	NA	-0.346151	0.0177245	cytohesin 4	This gene encodes a member of the PSCD family of proteins, which have an N-terminal coiled-coil motif, a central Sec7 domain, and a C-terminal pleckstrin homology (PH) domain. The coiled-coil motif is involved in homodimerization, the Sec7 domain contains guanine-nucleotide exchange protein (GEP) activity, and the PH domain interacts with phospholipids and is responsible for association of PSCDs …
ENSG00000105122	RASAL3	chr19	normal_specific	NA	NA	-0.303905	0.0177245	RAS protein activator like 3	This gene belongs to the Ras GTPase-activating proteins (RasGAP) family and encodes a protein with pleckstrin homology (PH), C2, and Ras GTPase-activation protein (RasGAP) domains. This protein is localized near or at the plasma membrane when expressed exogenously. Reduced expression of this gene in some cell lines resulted in increased levels of the active form of Ras (Ras-GTP), suggesting that …
ENSG00000107625	DDX50	chr10	normal_specific	NA	NA	0.0736389	0.0177245	DExD-box helicase 50	DEAD box proteins, characterized by the conserved motif Asp-Glu-Ala-Asp (DEAD), are putative RNA helicases. They are implicated in a number of cellular processes involving alteration of RNA secondary structure such as translation initiation, nuclear and mitochondrial splicing, and ribosome and spliceosome assembly. Based on their distribution patterns, some members of this DEAD box protein family…
ENSG00000145740	SLC30A5	chr5	normal_specific	NA	NA	0.0908447	0.0177327	solute carrier family 30 member 5	This gene encodes a member of the SLC30A/ZnT family of zinc transporter proteins. ZnT proteins mediate both cellular zinc efflux and zinc sequestration into membrane-bound organelles. The encoded protein plays a role in the early secretory pathway as a heterodimer with zinc transporter 6, and may also regulate zinc sequestration into secretory granules of pancreatic beta cells. Alternatively spli…
ENSG00000179295	PTPN11	chr12	normal_specific	NA	NA	0.103661	0.0177726	protein tyrosine phosphatase non-receptor type 11	The protein encoded by this gene is a member of the protein tyrosine phosphatase (PTP) family. PTPs are known to be signaling molecules that regulate a variety of cellular processes including cell growth, differentiation, mitotic cycle, and oncogenic transformation. This PTP contains two tandem Src homology-2 domains, which function as phospho-tyrosine binding domains and mediate the interaction …
ENSG00000112697	TMEM30A	chr6	normal_specific	NA	NA	0.0883821	0.0180939	transmembrane protein 30A	NA
ENSG00000129682	FGF13	chrX	normal_specific	NA	NA	-0.24103	0.0180939	fibroblast growth factor 13	The protein encoded by this gene is a member of the fibroblast growth factor (FGF) family. FGF family members possess broad mitogenic and cell survival activities, and are involved in a variety of biological processes, including embryonic development, cell growth, morphogenesis, tissue repair, tumor growth, and invasion. This gene is located in a region on chromosome X, which is associated with B…
ENSG00000143669	LYST	chr1	normal_specific	NA	NA	-0.12138	0.0181317	lysosomal trafficking regulator	This gene encodes a protein that regulates intracellular protein trafficking in endosomes, and may be involved in pigmentation. Mutations in this gene are associated with Chediak-Higashi syndrome, a lysosomal storage disorder. Alternative splicing results in multiple transcript variants, though the full-length nature of some of these variants has not been determined. [provided by RefSeq, Apr 2013…
ENSG00000124205	EDN3	chr20	normal_specific	NA	NA	0.415664	0.018195	endothelin 3	The protein encoded by this gene is a member of the endothelin family. Endothelins are endothelium-derived vasoactive peptides involved in a variety of biological functions. The active form of this protein is a 21 amino acid peptide processed from the precursor protein. The active peptide is a ligand for endothelin receptor type B (EDNRB). The interaction of this endothelin with EDNRB is essentia…
ENSG00000134508	CABLES1	chr18	normal_specific	NA	NA	-0.185642	0.018195	Cdk5 and Abl enzyme substrate 1	This gene encodes a protein involved in regulation of the cell cycle through interactions with several cyclin-dependent kinases. One study (PMID: 16177568) reported aberrant splicing of transcripts from this gene which results in removal of the cyclin binding domain only in human cancer cells, and reduction in gene expression was shown in colorectal cancers (PMID: 17982127).Multiple transcript va…
ENSG00000167613	LAIR1	chr19	normal_specific	NA	NA	-0.37594	0.018195	leukocyte associated immunoglobulin like receptor 1	The protein encoded by this gene is an inhibitory receptor found on peripheral mononuclear cells, including natural killer cells, T cells, and B cells. Inhibitory receptors regulate the immune response to prevent lysis of cells recognized as self. The gene is a member of both the immunoglobulin superfamily and the leukocyte-associated inhibitory receptor family. The gene maps to a region of 19q13…
ENSG00000179456	ZBTB18	chr1	normal_specific	NA	NA	-0.118231	0.018195	zinc finger and BTB domain containing 18	This gene encodes a C2H2-type zinc finger protein which acts a transcriptional repressor of genes involved in neuronal development. The encoded protein recognizes a specific sequence motif and recruits components of chromatin to target genes. Alternative splicing results in multiple transcript variants. [provided by RefSeq, May 2013].
ENSG00000206503	HLA-A	chr6	normal_specific	NA	NA	-0.22091	0.018195	major histocompatibility complex, class I, A	HLA-A belongs to the HLA class I heavy chain paralogues. This class I molecule is a heterodimer consisting of a heavy chain and a light chain (beta-2 microglobulin). The heavy chain is anchored in the membrane. Class I molecules play a central role in the immune system by presenting peptides derived from the endoplasmic reticulum lumen. They are expressed in nearly all cells. The heavy chain is a…
ENSG00000164323	CFAP97	chr4	normal_specific	NA	NA	0.0956014	0.0183128	cilia and flagella associated protein 97	NA
ENSG00000050344	NFE2L3	chr7	normal_specific	NA	NA	-0.200264	0.018532	nuclear factor, erythroid 2 like 3	This gene encodes a member of the cap 'n' collar basic-region leucine zipper family of transcription factors. The encoded protein heterodimerizes with small musculoaponeurotic fibrosarcoma factors to bind antioxidant response elements in target genes. This protein is a membrane bound glycoprotein that is targeted to the endoplasmic reticulum and the nuclear envelope. Pseudogenes of this gene are …
ENSG00000100554	ATP6V1D	chr14	normal_specific	NA	NA	0.132806	0.018532	ATPase H+ transporting V1 subunit D	This gene encodes a component of vacuolar ATPase (V-ATPase), a multisubunit enzyme that mediates acidification of eukaryotic intracellular organelles. V-ATPase dependent organelle acidification is necessary for such intracellular processes as protein sorting, zymogen activation, receptor-mediated endocytosis, and synaptic vesicle proton gradient generation. V-ATPase is composed of a cytosolic V1 …
ENSG00000108064	TFAM	chr10	normal_specific	NA	NA	0.098659	0.018532	transcription factor A, mitochondrial	This gene encodes a key mitochondrial transcription factor containing two high mobility group motifs. The encoded protein also functions in mitochondrial DNA replication and repair. Sequence polymorphisms in this gene are associated with Alzheimer's and Parkinson's diseases. There are pseudogenes for this gene on chromosomes 6, 7, and 11. Alternative splicing results in multiple transcript varian…
ENSG00000136160	EDNRB	chr13	normal_specific	NA	NA	0.261	0.018532	endothelin receptor type B	The protein encoded by this gene is a G protein-coupled receptor which activates a phosphatidylinositol-calcium second messenger system. Its ligand, endothelin, consists of a family of three potent vasoactive peptides: ET1, ET2, and ET3. Studies suggest that the multigenic disorder, Hirschsprung disease type 2, is due to mutations in the endothelin receptor type B gene. Alternative splicing and t…
ENSG00000084070	SMAP2	chr1	normal_specific	NA	NA	-0.175534	0.0185955	small ArfGAP2	NA
ENSG00000180098	TRNAU1AP	chr1	normal_specific	NA	NA	-0.0981021	0.0185955	tRNA selenocysteine 1 associated protein 1	NA
ENSG00000100417	PMM1	chr22	normal_specific	NA	NA	-0.100941	0.0186519	phosphomannomutase 1	Phosphomannomutase catalyzes the conversion between D-mannose 6-phosphate and D-mannose 1-phosphate which is a substrate for GDP-mannose synthesis. GDP-mannose is used for synthesis of dolichol-phosphate-mannose, which is essential for N-linked glycosylation and thus the secretion of several glycoproteins as well as for the synthesis of glycosyl-phosphatidyl-inositol (GPI) anchored proteins. [pro…
ENSG00000105397	TYK2	chr19	normal_specific	NA	NA	-0.0972601	0.0186519	tyrosine kinase 2	This gene encodes a member of the tyrosine kinase and, more specifically, the Janus kinases (JAKs) protein families. This protein associates with the cytoplasmic domain of type I and type II cytokine receptors and promulgate cytokine signals by phosphorylating receptor subunits. It is also component of both the type I and type III interferon signaling pathways. As such, it may play a role in anti…
ENSG00000186567	CEACAM19	chr19	normal_specific	NA	NA	-0.243765	0.0187012	CEA cell adhesion molecule 19	NA
ENSG00000204681	GABBR1	chr6	normal_specific	NA	NA	-0.170931	0.0187214	gamma-aminobutyric acid type B receptor subunit 1	This gene encodes a receptor for gamma-aminobutyric acid (GABA), which is the main inhibitory neurotransmitter in the mammalian central nervous system. This receptor functions as a heterodimer with GABA(B) receptor 2. Defects in this gene may underlie brain disorders such as schizophrenia and epilepsy. Alternative splicing generates multiple transcript variants, but the full-length nature of some…
ENSG00000104324	CPQ	chr8	normal_specific	NA	NA	0.198599	0.0188181	carboxypeptidase Q	This gene encodes a metallopeptidase that belongs to the peptidase M28 family. The encoded protein may catalyze the cleavage of dipeptides with unsubstituted terminals into amino acids. [provided by RefSeq, Jul 2013].
ENSG00000113263	ITK	chr5	normal_specific	NA	NA	-0.398088	0.0190113	IL2 inducible T cell kinase	This gene encodes an intracellular tyrosine kinase expressed in T-cells. The protein contains both SH2 and SH3 domains which are often found in intracellular kinases. It is thought to play a role in T-cell proliferation and differentiation. [provided by RefSeq, Jul 2008].
ENSG00000169508	GPR183	chr13	normal_specific	NA	NA	-0.440486	0.0190113	G protein-coupled receptor 183	This gene was identified by the up-regulation of its expression upon Epstein-Barr virus infection of primary B lymphocytes. This gene is predicted to encode a G protein-coupled receptor that is most closely related to the thrombin receptor. Expression of this gene was detected in B-lymphocyte cell lines and lymphoid tissues but not in T-lymphocyte cell lines or peripheral blood T lymphocytes. The…
ENSG00000203326	ZNF525	chr19	normal_specific	NA	NA	-0.139028	0.0190113	zinc finger protein 525	NA
ENSG00000153130	SCOC	chr4	normal_specific	NA	NA	0.111247	0.0190181	short coiled-coil protein	This gene encodes a short coiled-coiled domain-containing protein that localizes to the Golgi apparatus. The encoded protein interacts with ADP-ribosylation factor-like proteins. Pseudogenes of this gene are found on chromosomes 1 and 14. Alternative splicing results in multiple transcript variants. [provided by RefSeq, Apr 2009].
ENSG00000176834	VSIG10	chr12	normal_specific	NA	NA	-0.159315	0.0190833	V-set and immunoglobulin domain containing 10	NA
ENSG00000103742	IGDCC4	chr15	normal_specific	NA	NA	0.277025	0.0194667	immunoglobulin superfamily DCC subclass member 4	NA
ENSG00000142185	TRPM2	chr21	normal_specific	NA	NA	-0.306956	0.0194667	transient receptor potential cation channel subfamily M member 2	The protein encoded by this gene forms a tetrameric cation channel that is permeable to calcium, sodium, and potassium and is regulated by free intracellular ADP-ribose. The encoded protein is activated by oxidative stress and confers susceptibility to cell death. Alternative splicing results in multiple transcript variants encoding distinct protein isoforms. Additional transcript variants of thi…
ENSG00000049759	NEDD4L	chr18	normal_specific	NA	NA	-0.164558	0.0196257	NEDD4 like E3 ubiquitin protein ligase	This gene encodes a member of the Nedd4 family of HECT domain E3 ubiquitin ligases. HECT domain E3 ubiquitin ligases transfer ubiquitin from E2 ubiquitin-conjugating enzymes to protein substrates, thus targeting specific proteins for lysosomal degradation. The encoded protein mediates the ubiquitination of multiple target substrates and plays a critical role in epithelial sodium transport by regu…
ENSG00000099219	ERMP1	chr9	normal_specific	NA	NA	0.167239	0.0196852	endoplasmic reticulum metallopeptidase 1	NA
ENSG00000112763	BTN2A1	chr6	normal_specific	NA	NA	-0.0959275	0.0197707	butyrophilin subfamily 2 member A1	This gene encodes a member of the immunoglobulin superfamily. The gene is located in a cluster of butyrophilin-like genes in the juxta-telomeric region of the major histocompatibility complex on chromosome 6. A pseudogene of this gene has been identified in this cluster. The encoded protein is an integral plasma membrane protein involved in lipid, fatty-acid, and sterol metabolism. Alterations in…
ENSG00000153283	CD96	chr3	normal_specific	NA	NA	-0.267685	0.0199397	CD96 molecule	The protein encoded by this gene belongs to the immunoglobulin superfamily. It is a type I membrane protein. The protein may play a role in the adhesive interactions of activated T and NK cells during the late phase of the immune response. It may also function in antigen presentation. Alternative splicing generates multiple transcript variants encoding distinct isoforms. [provided by RefSeq, Jan …
ENSG00000009950	MLXIPL	chr7	normal_specific	NA	NA	-0.359507	0.0204066	MLX interacting protein like	This gene encodes a basic helix-loop-helix leucine zipper transcription factor of the Myc/Max/Mad superfamily. This protein forms a heterodimeric complex and binds and activates, in a glucose-dependent manner, carbohydrate response element (ChoRE) motifs in the promoters of triglyceride synthesis genes. The gene is deleted in Williams-Beuren syndrome, a multisystem developmental disorder caused b…
ENSG00000087510	TFAP2C	chr20	normal_specific	NA	NA	-0.268943	0.0204518	transcription factor AP-2 gamma	The protein encoded by this gene is a sequence-specific DNA-binding transcription factor involved in the activation of several developmental genes. The encoded protein can act as either a homodimer or heterodimer with other family members and is induced during retinoic acid-mediated differentiation. It plays a role in the development of the eyes, face, body wall, limbs, and neural tube. [provided…
ENSG00000140368	PSTPIP1	chr15	normal_specific	NA	NA	-0.35732	0.0208354	proline-serine-threonine phosphatase interacting protein 1	This gene encodes a cytoskeletal protein that is highly expressed in hemopoietic tissues. This protein functions via its interaction with several different proteins involved in cytoskeletal organization and inflammatory processes. It binds to the cytoplasmic tail of CD2, an effector of T cell activation and adhesion, downregulating CD2-triggered adhesion. It binds PEST-type protein tyrosine phosp…
ENSG00000001561	ENPP4	chr6	normal_specific	NA	NA	0.122674	0.02146	ectonucleotide pyrophosphatase/phosphodiesterase 4	NA
ENSG00000058804	NDC1	chr1	normal_specific	NA	NA	0.0948807	0.0216761	NDC1 transmembrane nucleoporin	NA
ENSG00000178343	SHISA3	chr4	normal_specific	NA	NA	0.437386	0.0216937	shisa family member 3	This gene encodes a single-transmembrane protein which is one of nine members of a family of transmembrane adaptors that modulate both WNT and FGF signaling by blocking the maturation and transport of their receptors to the cell surface. Members of this family contain an N-terminal cysteine-rich domain with a distinct cysteine pattern, a single transmembrane domain, and a C-terminal proline-rich,…
ENSG00000038945	MSR1	chr8	normal_specific	NA	NA	-0.417645	0.0218442	macrophage scavenger receptor 1	This gene encodes the class A macrophage scavenger receptors, which include three different types (1, 2, 3) generated by alternative splicing of this gene. These receptors or isoforms are macrophage-specific trimeric integral membrane glycoproteins and have been implicated in many macrophage-associated physiological and pathological processes including atherosclerosis, Alzheimer's disease, and ho…
ENSG00000065357	DGKA	chr12	normal_specific	NA	NA	-0.213968	0.0218442	diacylglycerol kinase alpha	The protein encoded by this gene belongs to the eukaryotic diacylglycerol kinase family. It acts as a modulator that competes with protein kinase C for the second messenger diacylglycerol in intracellular signaling pathways. It also plays an important role in the resynthesis of phosphatidylinositols and phosphorylating diacylglycerol to phosphatidic acid. Several transcript variants encoding diff…
ENSG00000118785	SPP1	chr4	normal_specific	NA	NA	-0.637274	0.0218442	secreted phosphoprotein 1	The protein encoded by this gene is involved in the attachment of osteoclasts to the mineralized bone matrix. The encoded protein is secreted and binds hydroxyapatite with high affinity. The osteoclast vitronectin receptor is found in the cell membrane and may be involved in the binding to this protein. This protein is also a cytokine that upregulates expression of interferon-gamma and interleuki…
ENSG00000126456	IRF3	chr19	normal_specific	NA	NA	-0.128907	0.0218442	interferon regulatory factor 3	This gene encodes a member of the interferon regulatory transcription factor (IRF) family. The encoded protein is found in an inactive cytoplasmic form that upon serine/threonine phosphorylation forms a complex with CREBBP. This complex translocates to the nucleus and activates the transcription of interferons alpha and beta, as well as other interferon-induced genes. Alternatively spliced transc…
ENSG00000132623	ANKEF1	chr20	normal_specific	NA	NA	0.19565	0.0218442	ankyrin repeat and EF-hand domain containing 1	NA
ENSG00000104814	MAP4K1	chr19	normal_specific	NA	NA	-0.366223	0.0219146	mitogen-activated protein kinase kinase kinase kinase 1	NA
ENSG00000135905	DOCK10	chr2	normal_specific	NA	NA	-0.248181	0.0221645	dedicator of cytokinesis 10	This gene encodes a member of the dedicator of cytokinesis protein family. Members of this family are guanosine nucleotide exchange factors for Rho GTPases and defined by the presence of conserved DOCK-homology regions. The encoded protein belongs to the D (or Zizimin) subfamily of DOCK proteins, which also contain an N-terminal pleckstrin homology domain. Alternatively spliced transcript variant…
ENSG00000160712	IL6R	chr1	normal_specific	NA	NA	-0.253219	0.0221645	interleukin 6 receptor	This gene encodes a subunit of the interleukin 6 (IL6) receptor complex. Interleukin 6 is a potent pleiotropic cytokine that regulates cell growth and differentiation and plays an important role in the immune response. The IL6 receptor is a protein complex consisting of this protein and interleukin 6 signal transducer (IL6ST/GP130/IL6-beta), a receptor subunit also shared by many other cytokines.…
ENSG00000184515	BEX5	chrX	normal_specific	NA	NA	0.231655	0.022345	brain expressed X-linked 5	NA
ENSG00000157212	PAXIP1	chr7	normal_specific	NA	NA	0.0919755	0.0225347	PAX interacting protein 1	This gene is a member of the paired box (PAX) gene family and encodes a nuclear protein with six BRCT (breast cancer carboxy-terminal) domains. This protein plays a critical role in maintaining genome stability, condensation of chromatin and progression through mitosis. [provided by RefSeq, Jul 2008].
ENSG00000110321	EIF4G2	chr11	normal_specific	NA	NA	0.0872522	0.0229275	eukaryotic translation initiation factor 4 gamma 2	Translation initiation is mediated by specific recognition of the cap structure by eukaryotic translation initiation factor 4F (eIF4F), which is a cap binding protein complex that consists of three subunits: eIF4A, eIF4E and eIF4G. The protein encoded by this gene shares similarity with the C-terminal region of eIF4G that contains the binding sites for eIF4A and eIF3; eIF4G, in addition, contains…
ENSG00000146192	FGD2	chr6	normal_specific	NA	NA	-0.338866	0.0229275	FYVE, RhoGEF and PH domain containing 2	The protein encoded by this gene belongs to a family of guanine nucleotide exchange factors (GEFs) which control cytoskeleton-dependent membrane rearrangements by activating the cell division cycle 42 (CDC42) protein. This gene is expressed in B lymphocytes, macrophages, and dendritic cells. The encoded protein may play a role in leukocyte signaling and vesicle trafficking in antigen-presenting c…
ENSG00000116885	OSCP1	chr1	normal_specific	NA	NA	0.107587	0.0230156	organic solute carrier partner 1	NA
ENSG00000154059	IMPACT	chr18	normal_specific	NA	NA	0.112427	0.0230156	impact RWD domain protein	NA
ENSG00000185404	SP140L	chr2	normal_specific	NA	NA	-0.157593	0.0230156	SP140 nuclear body protein like	NA
ENSG00000123472	ATPAF1	chr1	normal_specific	NA	NA	0.0887286	0.023137	ATP synthase mitochondrial F1 complex assembly factor 1	This gene encodes an assembly factor for the F(1) component of the mitochondrial ATP synthase. This protein binds specifically to the F1 beta subunit and is thought to prevent this subunit from forming nonproductive homooligomers during enzyme assembly. Alternatively spliced transcript variants have been identified. [provided by RefSeq, Aug 2011].
ENSG00000168685	IL7R	chr5	normal_specific	NA	NA	-0.388233	0.023137	interleukin 7 receptor	The protein encoded by this gene is a receptor for interleukin 7 (IL7). The function of this receptor requires the interleukin 2 receptor, gamma chain (IL2RG), which is a common gamma chain shared by the receptors of various cytokines, including interleukins 2, 4, 7, 9, and 15. This protein has been shown to play a critical role in V(D)J recombination during lymphocyte development. Defects in thi…
ENSG00000082516	GEMIN5	chr5	normal_specific	NA	NA	0.0868911	0.023312	gem nuclear organelle associated protein 5	This gene encodes a WD repeat protein that is a component of the survival of motor neurons (SMN) complex. The SMN complex plays a critical role in mRNA splicing through the assembly of spliceosomal small nuclear ribonucleoproteins (snRNPs), and may also mediate the assembly and transport of other classes of ribonucleoproteins. The encoded protein is the snRNA-binding component of the SMN complex.…
ENSG00000132465	IGJ	chr4	normal_specific	NA	NA	-0.995833	0.023312	joining chain of multimeric IgA and IgM	NA
ENSG00000146223	RPL7L1	chr6	normal_specific	NA	NA	0.0847403	0.023312	ribosomal protein L7 like 1	NA
ENSG00000179163	FUCA1	chr1	normal_specific	NA	NA	0.169685	0.023312	alpha-L-fucosidase 1	The protein encoded by this gene is a lysosomal enzyme involved in the degradation of fucose-containing glycoproteins and glycolipids. Mutations in this gene are associated with fucosidosis (FUCA1D), which is an autosomal recessive lysosomal storage disease. A pseudogene of this locus is present on chr 2.[provided by RefSeq, Oct 2009].
ENSG00000183605	SFXN4	chr10	normal_specific	NA	NA	0.182378	0.023312	sideroflexin 4	This gene encodes a member of the sideroflexin family. The encoded protein is a transmembrane protein of the inner mitochondrial membrane, and is required for mitochondrial respiratory homeostasis and erythropoiesis. Mutations in this gene are associated with mitochondriopathy and macrocytic anemia. Alternatively spliced transcript variants have been found in this gene. [provided by RefSeq, Jan 2…
ENSG00000165449	SLC16A9	chr10	normal_specific	NA	NA	0.257565	0.0234028	solute carrier family 16 member 9	NA
ENSG00000142892	PIGK	chr1	normal_specific	NA	NA	0.117617	0.0234212	phosphatidylinositol glycan anchor biosynthesis class K	This gene encodes a member of the cysteine protease family C13 that is involved in glycosylphosphatidylinositol (GPI)-anchor biosynthesis. The GPI-anchor is a glycolipid found on many blood cells and serves to anchor proteins to the cell surface. This protein is a member of the multisubunit enzyme, GPI transamidase and is thought to be its enzymatic component. GPI transamidase mediates GPI anchor…
ENSG00000168234	TTC39C	chr18	normal_specific	NA	NA	-0.18087	0.0234212	tetratricopeptide repeat domain 39C	NA
ENSG00000198695	MT-ND6	chrM	normal_specific	NA	NA	-0.415908	0.0234212	NADH dehydrogenase, subunit 6 (complex I)	NA
ENSG00000102096	PIM2	chrX	normal_specific	NA	NA	-0.378022	0.0236648	Pim-2 proto-oncogene, serine/threonine kinase	This gene encodes a protooncogene that acts as a serine/threonine protein kinase. Studies determined the encoded protein functions to prevent apoptosis and to promote cell survival.[provided by RefSeq, Nov 2009].
ENSG00000185811	IKZF1	chr7	normal_specific	NA	NA	-0.349765	0.0236648	IKAROS family zinc finger 1	This gene encodes a transcription factor that belongs to the family of zinc-finger DNA-binding proteins associated with chromatin remodeling. The expression of this protein is restricted to the fetal and adult hemo-lymphopoietic system, and it functions as a regulator of lymphocyte differentiation. Several alternatively spliced transcript variants encoding different isoforms have been described f…
ENSG00000117114	LPHN2	chr1	normal_specific	NA	NA	0.105309	0.0237148	adhesion G protein-coupled receptor L2	This gene encodes a member of the latrophilin subfamily of G-protein coupled receptors. The encoded protein participates in the regulation of exocytosis. The proprotein is thought to be further cleaved within a cysteine-rich G-protein-coupled receptor proteolysis site into two chains that are non-covalently bound at the cell membrane. Alternative splicing results in multiple transcript variants. …
ENSG00000138363	ATIC	chr2	normal_specific	NA	NA	0.107501	0.0237148	5-aminoimidazole-4-carboxamide ribonucleotide formyltransferase/IMP cyclohydrolase	This gene encodes a bifunctional protein that catalyzes the last two steps of the de novo purine biosynthetic pathway. The N-terminal domain has phosphoribosylaminoimidazolecarboxamide formyltransferase activity, and the C-terminal domain has IMP cyclohydrolase activity. A mutation in this gene results in AICA-ribosiduria. [provided by RefSeq, Sep 2009].
ENSG00000186470	BTN3A2	chr6	normal_specific	NA	NA	-0.282952	0.0237148	butyrophilin subfamily 3 member A2	This gene encodes a member of the immunoglobulin superfamily, which resides in the juxta-telomeric region of the major histocompatability class 1 locus and is clustered with the other family members on chromosome 6. The encoded protein may be involved in the adaptive immune response. Alternatively spliced transcript variants encoding different isoforms have been found for this gene. [provided by …
ENSG00000129636	ITFG1	chr16	normal_specific	NA	NA	0.119507	0.02375	integrin alpha FG-GAP repeat containing 1	NA
ENSG00000094841	UPRT	chrX	normal_specific	NA	NA	0.0883881	0.0237895	uracil phosphoribosyltransferase homolog	This gene encodes uracil phosphoribosyltransferase, which catalyzes the conversion of uracil and 5-phosphoribosyl-1-R-diphosphate to uridine monophosphate (UMP). This reaction is an important part of nucleotide metabolism, specifically the pyrimidine salvage pathway. The enzyme localizes to the nucleus and cytoplasm. The protein is a potential target for rational design of drugs to treat parasiti…
ENSG00000169641	LUZP1	chr1	normal_specific	NA	NA	0.0995159	0.0237895	leucine zipper protein 1	This gene encodes a protein that contains a leucine zipper motif. The exact function of the encoded protein is not known. In mice this gene affects neural tube closure. Alternative splicing results in multiple transcript variants. [provided by RefSeq, Dec 2008].
ENSG00000005844	ITGAL	chr16	normal_specific	NA	NA	-0.413167	0.0241075	integrin subunit alpha L	ITGAL encodes the integrin alpha L chain. Integrins are heterodimeric integral membrane proteins composed of an alpha chain and a beta chain. This I-domain containing alpha integrin combines with the beta 2 chain (ITGB2) to form the integrin lymphocyte function-associated antigen-1 (LFA-1), which is expressed on all leukocytes. LFA-1 plays a central role in leukocyte intercellular adhesion throug…
ENSG00000111913	FAM65B	chr6	normal_specific	NA	NA	-0.293857	0.0241075	RHO family interacting cell polarization regulator 2	This gene encodes an atypical inhibitor of the small G protein RhoA. Inhibition of RhoA activity by the encoded protein mediates myoblast fusion and polarization of T cells and neutrophils. The encoded protein is a component of hair cell stereocilia that is essential for hearing. A splice site mutation in this gene results in hearing loss in human patients. [provided by RefSeq, Sep 2016].
ENSG00000170581	STAT2	chr12	normal_specific	NA	NA	-0.123961	0.0241075	signal transducer and activator of transcription 2	The protein encoded by this gene is a member of the STAT protein family. In response to cytokines and growth factors, STAT family members are phosphorylated by the receptor associated kinases, and then form homo- or heterodimers that translocate to the cell nucleus where they act as transcription activators. In response to interferon (IFN), this protein forms a complex with STAT1 and IFN regulato…
ENSG00000165752	STK32C	chr10	normal_specific	NA	NA	-0.134117	0.0244798	serine/threonine kinase 32C	The protein encoded by this gene is a member of the serine/threonine protein kinase family. It is thought that this family member is functional in brain due to its high expression levels there. DNA methylation differences have been found in this gene in monozygotic twins that are discordant for adolescent depression. Alternative splicing results in multiple transcript variants. [provided by RefSe…
ENSG00000197948	FCHSD1	chr5	normal_specific	NA	NA	-0.15362	0.0244798	FCH and double SH3 domains 1	NA
ENSG00000114503	NCBP2	chr3	normal_specific	NA	NA	0.0769246	0.0244818	nuclear cap binding protein subunit 2	The product of this gene is a component of the nuclear cap-binding protein complex (CBC), which binds to the monomethylated 5' cap of nascent pre-mRNA in the nucleoplasm. The encoded protein has an RNP domain commonly found in RNA binding proteins, and contains the cap-binding activity. The CBC promotes pre-mRNA splicing, 3'-end processing, RNA nuclear export, and nonsense-mediated mRNA decay. Mu…
ENSG00000155158	TTC39B	chr9	normal_specific	NA	NA	-0.160584	0.0244818	tetratricopeptide repeat domain 39B	NA
ENSG00000106404	CLDN15	chr7	normal_specific	NA	NA	-0.230291	0.0245018	claudin 15	This gene encodes a member of the claudin family. Claudins are integral membrane proteins and components of tight junction strands. Tight junction strands serve as a physical barrier to prevent solutes and water from passing freely through the paracellular space between epithelial or endothelial cell sheets, and also play critical roles in maintaining cell polarity and signal transductions. Alter…
ENSG00000141968	VAV1	chr19	normal_specific	NA	NA	-0.34198	0.0245018	vav guanine nucleotide exchange factor 1	This gene is a member of the VAV gene family. The VAV proteins are guanine nucleotide exchange factors (GEFs) for Rho family GTPases that activate pathways leading to actin cytoskeletal rearrangements and transcriptional alterations. The encoded protein is important in hematopoiesis, playing a role in T-cell and B-cell development and activation. The encoded protein has been identified as the spe…
ENSG00000184445	KNTC1	chr12	normal_specific	NA	NA	-0.173792	0.0245018	kinetochore associated 1	This gene encodes a protein that is one of many involved in mechanisms to ensure proper chromosome segregation during cell division. Experimental evidence indicated that the encoded protein functioned in a similar manner to that of the Drosophila rough deal protein. [provided by RefSeq, Jul 2008].
ENSG00000142512	SIGLEC10	chr19	normal_specific	NA	NA	-0.502012	0.0247518	sialic acid binding Ig like lectin 10	SIGLECs are members of the immunoglobulin superfamily that are expressed on the cell surface. Most SIGLECs have 1 or more cytoplasmic immune receptor tyrosine-based inhibitory motifs, or ITIMs. SIGLECs are typically expressed on cells of the innate immune system, with the exception of the B-cell expressed SIGLEC6 (MIM 604405).[supplied by OMIM, Jul 2002].
ENSG00000158859	ADAMTS4	chr1	normal_specific	NA	NA	0.5867	0.0247518	ADAM metallopeptidase with thrombospondin type 1 motif 4	This gene encodes a member of the ADAMTS (a disintegrin and metalloproteinase with thrombospondin motifs) protein family. Members of this family share several distinct protein modules, including a propeptide region, a metalloproteinase domain, a disintegrin-like domain, and a thrombospondin type 1 (TS) motif. Individual members of this family differ in the number of C-terminal TS motifs, and some…
ENSG00000163596	ICA1L	chr2	normal_specific	NA	NA	0.217462	0.0247518	islet cell autoantigen 1 like	NA
ENSG00000165650	PDZD8	chr10	normal_specific	NA	NA	0.102569	0.0247518	PDZ domain containing 8	NA
ENSG00000086189	DIMT1	chr5	normal_specific	NA	NA	0.112434	0.0248159	DIMT1 rRNA methyltransferase and ribosome maturation factor	The protein encoded by this gene is a methyltransferase that is responsible for dimethylation of adjacent adenosines near the 18S rRNA decoding site. The encoded protein is essential for ribosome biogenesis, although its catalytic activity is not involved in the process. The yeast ortholog of this protein functions in the cytoplasm while this protein functions in the nucleus. [provided by RefSeq,…
ENSG00000139910	NOVA1	chr14	normal_specific	NA	NA	0.195114	0.0249238	NOVA alternative splicing regulator 1	This gene encodes a neuron-specific RNA-binding protein, a member of the Nova family of paraneoplastic disease antigens, that is recognized and inhibited by paraneoplastic antibodies. These antibodies are found in the sera of patients with paraneoplastic opsoclonus-ataxia, breast cancer, and small cell lung cancer. Alternatively spliced transcripts encoding distinct isoforms have been described. …
ENSG00000177051	FBXO46	chr19	normal_specific	NA	NA	-0.11586	0.0250249	F-box protein 46	Members of the F-box protein family, such as FBXO46, are characterized by an approximately 40-amino acid F-box motif. SCF complexes, formed by SKP1 (MIM 601434), cullin (see CUL1; MIM 603134), and F-box proteins, act as protein-ubiquitin ligases. F-box proteins interact with SKP1 through the F box, and they interact with ubiquitination targets through other protein interaction domains (Jin et al.…
ENSG00000187764	SEMA4D	chr9	normal_specific	NA	NA	-0.134951	0.0250249	semaphorin 4D	NA
ENSG00000102606	ARHGEF7	chr13	normal_specific	NA	NA	-0.132739	0.0250817	Rho guanine nucleotide exchange factor 7	This gene encodes a protein that belongs to a family of cytoplasmic proteins that activate the Ras-like family of Rho proteins by exchanging bound GDP for GTP. It forms a complex with the small GTP binding protein Rac1 and recruits Rac1 to membrane ruffles and to focal adhesions. Multiple alternatively spliced transcript variants encoding different isoforms have been observed for this gene. [prov…
ENSG00000067248	DHX29	chr5	normal_specific	NA	NA	0.0943641	0.0251886	DExH-box helicase 29	This gene encodes a member of the DEAH (Asp-Glu-Ala-His) subfamily of proteins, part of the DEAD (Asp-Glu-Ala-Asp) box family of RNA helicases. The encoded protein functions in translation initiation, and is specifically required for ribosomal scanning across stable mRNA secondary structures during initiation codon selection. This protein may also play a role in sensing virally derived cytosolic …
ENSG00000198286	CARD11	chr7	normal_specific	NA	NA	-0.379243	0.0253126	caspase recruitment domain family member 11	The protein encoded by this gene belongs to the membrane-associated guanylate kinase (MAGUK) family, a class of proteins that functions as molecular scaffolds for the assembly of multiprotein complexes at specialized regions of the plasma membrane. This protein is also a member of the CARD protein family, which is defined by carrying a characteristic caspase-associated recruitment domain (CARD). …
ENSG00000112319	EYA4	chr6	normal_specific	NA	NA	-0.229401	0.0253503	EYA transcriptional coactivator and phosphatase 4	This gene encodes a member of the eyes absent (EYA) family of proteins. The encoded protein may act as a transcriptional activator through its protein phosphatase activity, and it may be important for eye development, and for continued function of the mature organ of Corti. Mutations in this gene are associated with postlingual, progressive, autosomal dominant hearing loss at the deafness, autoso…
ENSG00000125952	MAX	chr14	normal_specific	NA	NA	-0.117802	0.0257045	MYC associated factor X	The protein encoded by this gene is a member of the basic helix-loop-helix leucine zipper (bHLHZ) family of transcription factors. It is able to form homodimers and heterodimers with other family members, which include Mad, Mxi1 and Myc. Myc is an oncoprotein implicated in cell proliferation, differentiation and apoptosis. The homodimers and heterodimers compete for a common DNA target site (the …
ENSG00000143226	FCGR2A	chr1	normal_specific	NA	NA	-0.340656	0.0257045	Fc fragment of IgG receptor IIa	This gene encodes one member of a family of immunoglobulin Fc receptor genes found on the surface of many immune response cells. The protein encoded by this gene is a cell surface receptor found on phagocytic cells such as macrophages and neutrophils, and is involved in the process of phagocytosis and clearing of immune complexes. Alternative splicing results in multiple transcript variants. [pro…
ENSG00000073605	GSDMB	chr17	normal_specific	NA	NA	-0.229884	0.0258932	gasdermin B	This gene encodes a member of the gasdermin-domain containing protein family. Other gasdermin-family genes are implicated in the regulation of apoptosis in epithelial cells, and are linked to cancer. Alternative splicing and the use of alternative promoters results in multiple transcript variants. Additional variants have been described, but they are candidates for nonsense-mediated mRNA decay (N…
ENSG00000076928	ARHGEF1	chr19	normal_specific	NA	NA	-0.120718	0.0258932	Rho guanine nucleotide exchange factor 1	Rho GTPases play a fundamental role in numerous cellular processes that are initiated by extracellular stimuli that work through G protein coupled receptors. The encoded protein may form complex with G proteins and stimulate Rho-dependent signals. Multiple alternatively spliced transcript variants have been found for this gene, but the full-length nature of some variants has not been defined. [pr…
ENSG00000087237	CETP	chr16	normal_specific	NA	NA	0.430252	0.0258932	cholesteryl ester transfer protein	The protein encoded by this gene is found in plasma, where it is involved in the transfer of cholesteryl ester from high density lipoprotein (HDL) to other lipoproteins. Defects in this gene are a cause of hyperalphalipoproteinemia 1 (HALP1). Two transcript variants encoding different isoforms have been found for this gene. [provided by RefSeq, Oct 2013].
ENSG00000106355	LSM5	chr7	normal_specific	NA	NA	0.0973262	0.0258932	LSM5 homolog, U6 small nuclear RNA and mRNA degradation associated	Sm-like proteins were identified in a variety of organisms based on sequence homology with the Sm protein family (see SNRPD2; MIM 601061). Sm-like proteins contain the Sm sequence motif, which consists of 2 regions separated by a linker of variable length that folds as a loop. The Sm-like proteins are thought to form a stable heteromer present in tri-snRNP particles, which are important for pre-m…
ENSG00000137968	SLC44A5	chr1	normal_specific	NA	NA	-0.59069	0.0258932	solute carrier family 44 member 5	NA
ENSG00000164134	NAA15	chr4	normal_specific	NA	NA	0.10188	0.0258932	N-alpha-acetyltransferase 15, NatA auxiliary subunit	N-alpha-acetylation is among the most common post-translational protein modifications in eukaryotic cells. This process involves the transfer of an acetyl group from acetyl-coenzyme A to the alpha-amino group on a nascent polypeptide and is essential for normal cell function. This gene encodes the auxillary subunit of the N-terminal acetyltransferase A (NatA) complex. [provided by RefSeq, Jan 201…
ENSG00000171236	LRG1	chr19	normal_specific	NA	NA	0.564434	0.0258932	leucine rich alpha-2-glycoprotein 1	The leucine-rich repeat (LRR) family of proteins, including LRG1, have been shown to be involved in protein-protein interaction, signal transduction, and cell adhesion and development. LRG1 is expressed during granulocyte differentiation (O'Donnell et al., 2002 [PubMed 12223515]).[supplied by OMIM, Mar 2008].
ENSG00000185158	LRRC37B	chr17	normal_specific	NA	NA	-0.14176	0.0258932	leucine rich repeat containing 37B	NA
ENSG00000198729	PPP1R14C	chr6	normal_specific	NA	NA	0.254573	0.0258932	protein phosphatase 1 regulatory inhibitor subunit 14C	The degree of protein phosphorylation is regulated by a balance of protein kinase and phosphatase activities. Protein phosphatase-1 (PP1; see MIM 176875) is a signal-transducing phosphatase that influences neuronal activity, protein synthesis, metabolism, muscle contraction, and cell division. PPP1R14C is an inhibitor of PP1 (Liu et al., 2002 [PubMed 11812771]).[supplied by OMIM, Feb 2010].
ENSG00000103353	UBFD1	chr16	normal_specific	NA	NA	0.0783865	0.0260132	ubiquitin family domain containing 1	NA
ENSG00000139597	N4BP2L1	chr13	normal_specific	NA	NA	-0.186604	0.0260132	NEDD4 binding protein 2 like 1	NA
ENSG00000165060	FXN	chr9	normal_specific	NA	NA	0.102847	0.0260132	frataxin	This nuclear gene encodes a mitochondrial protein which belongs to the FRATAXIN family. The protein functions in regulating mitochondrial iron transport and respiration. The expansion of intronic trinucleotide repeat GAA from 8-33 repeats to >90 repeats results in Friedreich ataxia. Alternative splicing results in multiple transcript variants. [provided by RefSeq, Jul 2016].
ENSG00000205084	TMEM231	chr16	normal_specific	NA	NA	0.13719	0.0260132	transmembrane protein 231	This gene encodes a transmembrane protein, which is a component of the B9 complex involved in the formation of the diffusion barrier between the cilia and plasma membrane. Mutations in this gene cause Joubert syndrome (JBTS). Multiple alternatively spliced transcript variants have been found for this gene. [provided by RefSeq, Jan 2013].
ENSG00000023902	PLEKHO1	chr1	normal_specific	NA	NA	-0.202197	0.0260818	pleckstrin homology domain containing O1	NA
ENSG00000184983	NDUFA6	chr22	normal_specific	NA	NA	0.113533	0.0261689	NADH:ubiquinone oxidoreductase subunit A6	This gene encodes a member of the LYR family of proteins that contain a highly conserved tripeptide (LYR) motif near the N-terminus. The encoded protein is an accessory subunit of NADH: ubiquinone oxidorerductase (Complex I), which is the largest enzyme of the mitochondrial membrane respiratory chain. Complex I functions in electron transfer from NADH to the respiratory chain. [provided by RefSeq…
ENSG00000022556	NLRP2	chr19	normal_specific	NA	NA	-0.447157	0.026416	NLR family pyrin domain containing 2	This gene is a member of the nucleotide-binding and leucine-rich repeat receptor (NLR) family, and is predicted to contain an N-terminal pyrin effector domain (PYD), a centrally-located nucleotide-binding and oligomerization domain (NACHT) and C-terminal leucine-rich repeats (LRR). Members of this gene family are thought to be important regulators of immune responses. This gene product interacts …
ENSG00000065183	WDR3	chr1	normal_specific	NA	NA	0.149329	0.026416	WD repeat domain 3	This gene encodes a nuclear protein containing 10 WD repeats. WD repeats are approximately 30- to 40-amino acid domains containing several conserved residues, which usually include a trp-asp at the C-terminal end. Proteins belonging to the WD repeat family are involved in a variety of cellular processes, including cell cycle progression, signal transduction, apoptosis, and gene regulation. [provi…
ENSG00000125851	PCSK2	chr20	normal_specific	NA	NA	0.585558	0.026416	proprotein convertase subtilisin/kexin type 2	This gene encodes a member of the subtilisin-like proprotein convertase family, which includes proteases that process protein and peptide precursors trafficking through regulated or constitutive branches of the secretory pathway. The protein undergoes an initial autocatalytic processing event and interacts with a neuroendocrine secretory protein in the ER, exits the ER and sorts to secretory gran…
ENSG00000133247	SUV420H2	chr19	normal_specific	NA	NA	-0.16711	0.026416	lysine methyltransferase 5C	SUV420H2 and the related enzyme SUV420H1 (MIM 610881) function as histone methyltransferases that specifically trimethylate nucleosomal histone H4 (see MIM 602822) on lysine-20 (K20) (Schotta et al., 2004 [PubMed 15145825]).[supplied by OMIM, Dec 2009].
ENSG00000134030	CTIF	chr18	normal_specific	NA	NA	-0.119001	0.026416	cap binding complex dependent translation initiation factor	CTIF is a component of the CBP80 (NCBP1; MIM 600469)/CBP20 (NCBP2; MIM 605133) translation initiation complex that binds cotranscriptionally to the cap end of nascent mRNA. The CBP80/CBP20 complex is involved in a simultaneous editing and translation step that recognizes premature termination codons (PTCs) in mRNAs and directs PTC-containing mRNAs toward nonsense-mediated decay (NMD). On mRNAs wi…
ENSG00000159658	EFCAB14	chr1	normal_specific	NA	NA	0.0700973	0.026416	EF-hand calcium binding domain 14	NA
ENSG00000169379	ARL13B	chr3	normal_specific	NA	NA	0.13048	0.026416	ADP ribosylation factor like GTPase 13B	This gene encodes a member of the ADP-ribosylation factor-like family. The encoded protein is a small GTPase that contains both N-terminal and C-terminal guanine nucleotide-binding motifs. This protein is localized in the cilia and plays a role in cilia formation and in maintenance of cilia. Mutations in this gene are the cause of Joubert syndrome 8. Alternate splicing results in multiple transcr…
ENSG00000171724	VAT1L	chr16	normal_specific	NA	NA	-0.473988	0.026416	vesicle amine transport 1 like	NA
ENSG00000185950	IRS2	chr13	normal_specific	NA	NA	-0.231553	0.026416	insulin receptor substrate 2	This gene encodes the insulin receptor substrate 2, a cytoplasmic signaling molecule that mediates effects of insulin, insulin-like growth factor 1, and other cytokines by acting as a molecular adaptor between diverse receptor tyrosine kinases and downstream effectors. The product of this gene is phosphorylated by the insulin receptor tyrosine kinase upon receptor stimulation, as well as by an in…
ENSG00000155629	PIK3AP1	chr10	normal_specific	NA	NA	-0.222147	0.0265178	phosphoinositide-3-kinase adaptor protein 1	NA
ENSG00000121933	ADORA3	chr1	normal_specific	NA	NA	-0.422564	0.026588	transmembrane and immunoglobulin domain containing 3	This gene encodes a transmembrane and immunoglobulin domain-containing protein. Alternative splicing results in multiple transcript variants, one of which shares its 5' terminal exon with that of the overlapping adenosine A3 receptor gene (GeneID:140), thus resulting in a fusion product. [provided by RefSeq, Nov 2014].
ENSG00000141699	FAM134C	chr17	normal_specific	NA	NA	-0.0883223	0.026588	reticulophagy regulator family member 3	NA
ENSG00000143337	TOR1AIP1	chr1	normal_specific	NA	NA	0.103926	0.026588	torsin 1A interacting protein 1	This gene encodes a type 2 integral membrane protein that binds A- and B-type lamins. The encoded protein localizes to the inner nuclear membrane and may be involved in maintaining the attachment of the nuclear membrane to the nuclear lamina during cell division. Alternate splicing results in multiple transcript variants. [provided by RefSeq, Apr 2016].
ENSG00000184402	SS18L1	chr20	normal_specific	NA	NA	-0.106005	0.026588	SS18L1 subunit of BAF chromatin remodeling complex	This gene encodes a calcium-responsive transactivator which is an essential subunit of a neuron-specific chromatin-remodeling complex. The structure of this gene is similar to that of the SS18 gene. Mutations in this gene are involved in amyotrophic lateral sclerosis (ALS). Alternatively spliced transcript variants have been found for this gene. [provided by RefSeq, Sep 2014].
ENSG00000184922	FMNL1	chr17	normal_specific	NA	NA	-0.257359	0.026588	formin like 1	This gene encodes a formin-related protein. Formin-related proteins have been implicated in morphogenesis, cytokinesis, and cell polarity. An alternative splice variant has been described but its full length sequence has not been determined. [provided by RefSeq, Jul 2008].
ENSG00000108799	EZH1	chr17	normal_specific	NA	NA	-0.116009	0.0266339	enhancer of zeste 1 polycomb repressive complex 2 subunit	EZH1 is a component of a noncanonical Polycomb repressive complex-2 (PRC2) that mediates methylation of histone H3 (see MIM 602812) lys27 (H3K27) and functions in the maintenance of embryonic stem cell pluripotency and plasticity (Shen et al., 2008 [PubMed 19026780]).[supplied by OMIM, Mar 2009].
ENSG00000131730	CKMT2	chr5	normal_specific	NA	NA	0.332723	0.0269879	creatine kinase, mitochondrial 2	Mitochondrial creatine kinase (MtCK) is responsible for the transfer of high energy phosphate from mitochondria to the cytosolic carrier, creatine. It belongs to the creatine kinase isoenzyme family. It exists as two isoenzymes, sarcomeric MtCK and ubiquitous MtCK, encoded by separate genes. Mitochondrial creatine kinase occurs in two different oligomeric forms: dimers and octamers, in contrast t…
ENSG00000168874	ATOH8	chr2	normal_specific	NA	NA	-0.278986	0.0269879	atonal bHLH transcription factor 8	NA
ENSG00000086991	NOX4	chr11	normal_specific	NA	NA	-0.3701	0.0273649	NADPH oxidase 4	This gene encodes a member of the NOX-family of enzymes that functions as the catalytic subunit the NADPH oxidase complex. The encoded protein is localized to non-phagocytic cells where it acts as an oxygen sensor and catalyzes the reduction of molecular oxygen to various reactive oxygen species (ROS). The ROS generated by this protein have been implicated in numerous biological functions includi…
ENSG00000174326	SLC16A11	chr17	normal_specific	NA	NA	-0.224787	0.0273649	solute carrier family 16 member 11	NA
ENSG00000122861	PLAU	chr10	normal_specific	NA	NA	0.348232	0.0276603	plasminogen activator, urokinase	This gene encodes a secreted serine protease that converts plasminogen to plasmin. The encoded preproprotein is proteolytically processed to generate A and B polypeptide chains. These chains associate via a single disulfide bond to form the catalytically inactive high molecular weight urokinase-type plasminogen activator (HMW-uPA). HMW-uPA can be further processed into the catalytically active lo…
ENSG00000164104	HMGB2	chr4	normal_specific	NA	NA	-0.156661	0.0276603	high mobility group box 2	This gene encodes a member of the non-histone chromosomal high mobility group protein family. The proteins of this family are chromatin-associated and ubiquitously distributed in the nucleus of higher eukaryotic cells. In vitro studies have demonstrated that this protein is able to efficiently bend DNA and form DNA circles. These studies suggest a role in facilitating cooperative interactions bet…
ENSG00000165300	SLITRK5	chr13	normal_specific	NA	NA	0.422477	0.0276603	SLIT and NTRK like family member 5	Members of the SLITRK family, such as SLITRK5, are integral membrane proteins with 2 N-terminal leucine-rich repeat (LRR) domains similar to those of SLIT proteins (see SLIT1; MIM 603742). Most SLITRKs, including SLITRK5, also have C-terminal regions that share homology with neurotrophin receptors (see NTRK1; MIM 191315). SLITRKs are expressed predominantly in neural tissues and have neurite-modu…
ENSG00000182372	CLN8	chr8	normal_specific	NA	NA	-0.125064	0.0276603	CLN8 transmembrane ER and ERGIC protein	This gene encodes a transmembrane protein belonging to a family of proteins containing TLC domains, which are postulated to function in lipid synthesis, transport, or sensing. The protein localizes to the endoplasmic reticulum (ER), and may recycle between the ER and ER-Golgi intermediate compartment. Mutations in this gene are associated with a disorder characterized by progressive epilepsy with…
ENSG00000204525	HLA-C	chr6	normal_specific	NA	NA	-0.286148	0.0276603	major histocompatibility complex, class I, C	HLA-C belongs to the HLA class I heavy chain paralogues. This class I molecule is a heterodimer consisting of a heavy chain and a light chain (beta-2 microglobulin). The heavy chain is anchored in the membrane. Class I molecules play a central role in the immune system by presenting peptides derived from endoplasmic reticulum lumen. They are expressed in nearly all cells. The heavy chain is appro…
ENSG00000151729	SLC25A4	chr4	normal_specific	NA	NA	0.129844	0.0279315	solute carrier family 25 member 4	This gene is a member of the mitochondrial carrier subfamily of solute carrier protein genes. The product of this gene functions as a gated pore that translocates ADP from the cytoplasm into the mitochondrial matrix and ATP from the mitochondrial matrix into the cytoplasm. The protein forms a homodimer embedded in the inner mitochondria membrane. Mutations in this gene have been shown to result i…
ENSG00000158869	FCER1G	chr1	normal_specific	NA	NA	-0.357569	0.0279315	Fc fragment of IgE receptor Ig	The high affinity IgE receptor is a key molecule involved in allergic reactions. It is a tetramer composed of 1 alpha, 1 beta, and 2 gamma chains. The gamma chains are also subunits of other Fc receptors. [provided by RefSeq, Jul 2008].
ENSG00000162413	KLHL21	chr1	normal_specific	NA	NA	-0.187988	0.0279315	kelch like family member 21	NA
ENSG00000145824	CXCL14	chr5	normal_specific	NA	NA	0.46906	0.0285397	C-X-C motif chemokine ligand 14	This antimicrobial gene belongs to the cytokine gene family which encode secreted proteins involved in immunoregulatory and inflammatory processes. The protein encoded by this gene is structurally related to the CXC (Cys-X-Cys) subfamily of cytokines. Members of this subfamily are characterized by two cysteines separated by a single amino acid. This cytokine displays chemotactic activity for mono…
ENSG00000106948	AKNA	chr9	normal_specific	NA	NA	-0.169917	0.0290793	AT-hook transcription factor	NA
ENSG00000163531	NFASC	chr1	normal_specific	NA	NA	-0.216649	0.0291104	neurofascin	This gene encodes an L1 family immunoglobulin cell adhesion molecule with multiple IGcam and fibronectin domains. The protein functions in neurite outgrowth, neurite fasciculation, and organization of the axon initial segment (AIS) and nodes of Ranvier on axons during early development. Both the AIS and nodes of Ranvier contain high densities of voltage-gated Na+ (Nav) channels which are clustere…
ENSG00000160953	MUM1	chr19	normal_specific	NA	NA	-0.148869	0.0293916	PWWP domain containing 3A, DNA repair factor	NA
ENSG00000014824	SLC30A9	chr4	normal_specific	NA	NA	0.100148	0.029785	solute carrier family 30 member 9	NA
ENSG00000111911	HINT3	chr6	normal_specific	NA	NA	0.0987432	0.029785	histidine triad nucleotide binding protein 3	Histidine triad proteins, such as HINT3, are nucleotide hydrolases and transferases that act on the alpha-phosphate of ribonucleotides (Brenner, 2002 [PubMed 12119013]).[supplied by OMIM, Mar 2008].
ENSG00000138663	COPS4	chr4	normal_specific	NA	NA	0.103091	0.029785	COP9 signalosome subunit 4	This gene encodes one of eight subunits composing COP9 signalosome, a highly conserved protein complex that functions as an important regulator in multiple signaling pathways. The structure and function of COP9 signalosome is similar to that of the 19S regulatory particle of 26S proteasome. COP9 signalosome has been shown to interact with SCF-type E3 ubiquitin ligases and act as a positive regula…
ENSG00000176476	CCDC101	chr16	normal_specific	NA	NA	-0.105371	0.0298625	SAGA complex associated factor 29	CCDC101 is a subunit of 2 histone acetyltransferase complexes: the ADA2A (TADA2A; MIM 602276)-containing (ATAC) complex and the SPT3 (SUPT3H; MIM 602947)-TAF9 (MIM 600822)-GCN5 (KAT2A; MIM 602301)/PCAF (KAT2B; MIM 602303) acetylase (STAGA) complex. Both of these complexes contain either GCN5 or PCAF, which are paralogous acetyltransferases (Wang et al., 2008 [PubMed 18838386]).[supplied by OMIM, …
ENSG00000167220	HDHD2	chr18	normal_specific	NA	NA	0.0936068	0.0298999	haloacid dehalogenase like hydrolase domain containing 2	NA
ENSG00000177426	TGIF1	chr18	normal_specific	NA	NA	-0.173847	0.0298999	TGFB induced factor homeobox 1	The protein encoded by this gene is a member of the three-amino acid loop extension (TALE) superclass of atypical homeodomains. TALE homeobox proteins are highly conserved transcription regulators. This particular homeodomain binds to a previously characterized retinoid X receptor responsive element from the cellular retinol-binding protein II promoter. In addition to its role in inhibiting 9-cis…
ENSG00000163347	CLDN1	chr3	normal_specific	NA	NA	0.484908	0.0300443	claudin 1	Tight junctions represent one mode of cell-to-cell adhesion in epithelial or endothelial cell sheets, forming continuous seals around cells and serving as a physical barrier to prevent solutes and water from passing freely through the paracellular space. These junctions are comprised of sets of continuous networking strands in the outwardly facing cytoplasmic leaflet, with complementary grooves i…
ENSG00000205358	MT1H	chr16	normal_specific	NA	NA	-0.493191	0.0300443	metallothionein 1H	NA
ENSG00000165732	DDX21	chr10	normal_specific	NA	NA	0.242485	0.0300779	DExD-box helicase 21	DEAD box proteins, characterized by the conserved motif Asp-Glu-Ala-Asp (DEAD), are putative RNA helicases. They are implicated in a number of cellular processes involving alteration of RNA secondary structure such as translation initiation, nuclear and mitochondrial splicing, and ribosome and spliceosome assembly. Based on their distribution patterns, some members of this family are believed to …
ENSG00000077984	CST7	chr20	normal_specific	NA	NA	-0.35393	0.0300936	cystatin F	The cystatin superfamily encompasses proteins that contain multiple cystatin-like sequences. Some of the members are active cysteine protease inhibitors, while others have lost or perhaps never acquired this inhibitory activity. There are three inhibitory families in the superfamily, including the type 1 cystatins (stefins), type 2 cystatins and the kininogens. The type 2 cystatin proteins are a …
ENSG00000172115	CYCS	chr7	normal_specific	NA	NA	0.188734	0.0300936	cytochrome c, somatic	This gene encodes a small heme protein that functions as a central component of the electron transport chain in mitochondria. The encoded protein associates with the inner membrane of the mitochondrion where it accepts electrons from cytochrome b and transfers them to the cytochrome oxidase complex. This protein is also involved in initiation of apoptosis. Mutations in this gene are associated wi…
ENSG00000172890	NADSYN1	chr11	normal_specific	NA	NA	-0.112927	0.0304417	NAD synthetase 1	Nicotinamide adenine dinucleotide (NAD) is a coenzyme in metabolic redox reactions, a precursor for several cell signaling molecules, and a substrate for protein posttranslational modifications. NAD synthetase (EC 6.3.5.1) catalyzes the final step in the biosynthesis of NAD from nicotinic acid adenine dinucleotide (NaAD).[supplied by OMIM, Apr 2004].
ENSG00000117906	RCN2	chr15	normal_specific	NA	NA	0.0995451	0.0304598	reticulocalbin 2	The protein encoded by this gene is a calcium-binding protein located in the lumen of the ER. The protein contains six conserved regions with similarity to a high affinity Ca(+2)-binding motif, the EF-hand. This gene maps to the same region as type 4 Bardet-Biedl syndrome, suggesting a possible causative role for this gene in the disorder. Alternatively spliced transcript variants encoding differ…
ENSG00000124532	MRS2	chr6	normal_specific	NA	NA	0.0786326	0.0306865	magnesium transporter MRS2	NA
ENSG00000100385	IL2RB	chr22	normal_specific	NA	NA	-0.387055	0.0307152	interleukin 2 receptor subunit beta	The interleukin 2 receptor, which is involved in T cell-mediated immune responses, is present in 3 forms with respect to ability to bind interleukin 2. The low affinity form is a monomer of the alpha subunit and is not involved in signal transduction. The intermediate affinity form consists of an alpha/beta subunit heterodimer, while the high affinity form consists of an alpha/beta/gamma subunit …
ENSG00000125266	EFNB2	chr13	normal_specific	NA	NA	0.160629	0.0307152	ephrin B2	This gene encodes a member of the ephrin (EPH) family. The ephrins and EPH-related receptors comprise the largest subfamily of receptor protein-tyrosine kinases and have been implicated in mediating developmental events, especially in the nervous system and in erythropoiesis. Based on their structures and sequence relationships, ephrins are divided into the ephrin-A (EFNA) class, which are anchor…
ENSG00000198408	MGEA5	chr10	normal_specific	NA	NA	-0.117163	0.0307152	O-GlcNAcase	The dynamic modification of cytoplasmic and nuclear proteins by O-linked N-acetylglucosamine (O-GlcNAc) addition and removal on serine and threonine residues is catalyzed by OGT (MIM 300255), which adds O-GlcNAc, and MGEA5, a glycosidase that removes O-GlcNAc modifications (Gao et al., 2001 [PubMed 11148210]).[supplied by OMIM, Mar 2008].
ENSG00000167186	COQ7	chr16	normal_specific	NA	NA	0.088089	0.0310065	coenzyme Q7, hydroxylase	The protein encoded by this gene is similar to a mitochondrial di-iron containing hydroxylase in Saccharomyces cerevisiae that is involved with ubiquinone biosynthesis. Mutations in the yeast gene lead to slower development and longer life span. Alternatively spliced transcript variants have been found for this gene. [provided by RefSeq, Jul 2010].
ENSG00000157927	RADIL	chr7	normal_specific	NA	NA	-0.212674	0.0311585	Rap associating with DIL domain	NA
ENSG00000119723	COQ6	chr14	normal_specific	NA	NA	0.0993681	0.0312663	coenzyme Q6, monooxygenase	The protein encoded by this gene belongs to the ubiH/COQ6 family. It is an evolutionarily conserved monooxygenase required for the biosynthesis of coenzyme Q10 (or ubiquinone), which is an essential component of the mitochondrial electron transport chain, and one of the most potent lipophilic antioxidants implicated in the protection of cell damage by reactive oxygen species. Knockdown of this ge…
ENSG00000095585	BLNK	chr10	normal_specific	NA	NA	0.233605	0.0313301	B cell linker	This gene encodes a cytoplasmic linker or adaptor protein that plays a critical role in B cell development. This protein bridges B cell receptor-associated kinase activation with downstream signaling pathways, thereby affecting various biological functions. The phosphorylation of five tyrosine residues is necessary for this protein to nucleate distinct signaling effectors following B cell recepto…
ENSG00000111249	CUX2	chr12	normal_specific	NA	NA	0.447005	0.0314175	cut like homeobox 2	This gene encodes a protein which contains three CUT domains and a homeodomain; both domains are DNA-binding motifs. A similar gene, whose gene product possesses different DNA-binding activities, is located on chromosome on chromosome 7. Two pseudogenes of this gene have been identified on chromosomes 10 and 4. [provided by RefSeq, Jan 2013].
ENSG00000141664	ZCCHC2	chr18	normal_specific	NA	NA	-0.11503	0.0315515	zinc finger CCHC-type containing 2	NA
ENSG00000034971	MYOC	chr1	normal_specific	NA	NA	0.584919	0.0316049	myocilin	MYOC encodes the protein myocilin, which is believed to have a role in cytoskeletal function. MYOC is expressed in many occular tissues, including the trabecular meshwork, and was revealed to be the trabecular meshwork glucocorticoid-inducible response protein (TIGR). The trabecular meshwork is a specialized eye tissue essential in regulating intraocular pressure, and mutations in MYOC have been …
ENSG00000249115	HAUS5	chr19	normal_specific	NA	NA	-0.124743	0.0316049	HAUS augmin like complex subunit 5	HAUS5 is 1 of 8 subunits of the 390-kD human augmin complex, or HAUS complex. The augmin complex was first identified in Drosophila, and its name comes from the Latin verb 'augmentare,' meaning 'to increase.' The augmin complex is a microtubule-binding complex involved in microtubule generation within the mitotic spindle and is vital to mitotic spindle assembly (Goshima et al., 2008 [PubMed 18443…
ENSG00000154358	OBSCN	chr1	normal_specific	NA	NA	-0.208332	0.0317108	obscurin, cytoskeletal calmodulin and titin-interacting RhoGEF	The obscurin gene spans more than 150 kb, contains over 80 exons and encodes a protein of approximately 720 kDa. The encoded protein contains 68 Ig domains, 2 fibronectin domains, 1 calcium/calmodulin-binding domain, 1 RhoGEF domain with an associated PH domain, and 2 serine-threonine kinase domains. This protein belongs to the family of giant sacromeric signaling proteins that includes titin and…
ENSG00000164938	TP53INP1	chr8	normal_specific	NA	NA	-0.199405	0.0328572	tumor protein p53 inducible nuclear protein 1	NA
ENSG00000105974	CAV1	chr7	normal_specific	NA	NA	0.243265	0.0331774	caveolin 1	The scaffolding protein encoded by this gene is the main component of the caveolae plasma membranes found in most cell types. The protein links integrin subunits to the tyrosine kinase FYN, an initiating step in coupling integrins to the Ras-ERK pathway and promoting cell cycle progression. The gene is a tumor suppressor gene candidate and a negative regulator of the Ras-p42/44 mitogen-activated …
ENSG00000162894	FAIM3	chr1	normal_specific	NA	NA	-0.373414	0.033908	Fc fragment of IgM receptor	Fc receptors specifically bind to the Fc region of immunoglobulins (Igs) to mediate the unique functions of each Ig class. FAIM3 encodes an Fc receptor for IgM (see MIM 147020) (Kubagawa et al., 2009 [PubMed 19858324]; Shima et al., 2010 [PubMed 20042454]).[supplied by OMIM, Jul 2010].
ENSG00000176946	THAP4	chr2	normal_specific	NA	NA	0.096399	0.0343471	THAP domain containing 4	NA
ENSG00000197444	OGDHL	chr10	normal_specific	NA	NA	0.196744	0.0345303	oxoglutarate dehydrogenase like	The protein encoded by this gene is similar to oxoglutarate dehydrogenase (OGDH) of the OGDH complex, which degrades glucose and glutamate. This gene encodes several isoforms, including some that appear to localize to mitochondria. The encoded protein down-regulates the AKT signaling cascade and can suppress the growth of cervical cancer cells. [provided by RefSeq, Dec 2016].
ENSG00000138759	FRAS1	chr4	normal_specific	NA	NA	-0.333017	0.0346738	Fraser extracellular matrix complex subunit 1	This gene encodes an extracellular matrix protein that appears to function in the regulation of epidermal-basement membrane adhesion and organogenesis during development. Mutations in this gene cause Fraser syndrome, a multisystem malformation that can include craniofacial, urogenital and respiratory system abnormalities. Alternative splicing results in multiple transcript variants. [provided by …
ENSG00000128829	EIF2AK4	chr15	normal_specific	NA	NA	0.0984175	0.0347465	eukaryotic translation initiation factor 2 alpha kinase 4	This gene encodes a member of a family of kinases that phosphorylate the alpha subunit of eukaryotic translation initiation factor-2 (EIF2), resulting in the downregulaton of protein synthesis. The encoded protein responds to amino acid deprivation by binding uncharged transfer RNAs. It may also be activated by glucose deprivation and viral infection. Mutations in this gene have been found in ind…
ENSG00000150456	N6AMT2	chr13	normal_specific	NA	NA	0.117391	0.0347465	EEF1A lysine methyltransferase 1	NA
ENSG00000175573	C11orf68	chr11	normal_specific	NA	NA	-0.0930514	0.0347465	chromosome 11 open reading frame 68	NA
ENSG00000164574	GALNT10	chr5	normal_specific	NA	NA	0.127406	0.0349341	polypeptide N-acetylgalactosaminyltransferase 10	This gene encodes a member of the GalNAc polypeptide N-acetylgalactosaminyltransferases. These enzymes catalyze the first step in the synthesis of mucin-type oligosaccharides. These proteins transfer GalNAc from UDP-GalNAc to either serine or threonine residues of polypeptide acceptors. The protein encoded by this locus may have increased catalytic activity toward glycosylated peptides compared t…
ENSG00000183549	ACSM5	chr16	normal_specific	NA	NA	-0.311428	0.0349341	acyl-CoA synthetase medium chain family member 5	NA
ENSG00000130299	GTPBP3	chr19	normal_specific	NA	NA	-0.122978	0.0352218	GTP binding protein 3, mitochondrial	This locus encodes a GTP-binding protein. The encoded protein is localized to the mitochondria and may play a role in mitochondrial tRNA modification. Polymorphisms at this locus may be associated with severity of aminoglycoside-induced deafness, a disease associated with a mutation in the 12S rRNA. Alternatively spliced transcript variants encoding different isoforms have been described. [provid…
ENSG00000102038	SMARCA1	chrX	normal_specific	NA	NA	0.106744	0.035252	SWI/SNF related, matrix associated, actin dependent regulator of chromatin, subfamily a, member 1	This gene encodes a member of the SWI/SNF family of proteins. The encoded protein is an ATPase which is expressed in diverse tissues and contributes to the chromatin remodeling complex that is involved in transcription. The protein may also play a role in DNA damage, growth inhibition and apoptosis of cancer cells. Alternative splicing results in multiple transcript variants. [provided by RefSeq,…
ENSG00000066827	ZFAT	chr8	normal_specific	NA	NA	0.241602	0.0353449	zinc finger and AT-hook domain containing	This gene encodes a protein that likely binds DNA and functions as a transcriptional regulator involved in apoptosis and cell survival. This gene resides in a susceptibility locus for autoimmune thyroid disease (AITD) on chromosome 8q24. Alternative splicing results in multiple transcript variants encoding distinct isoforms. [provided by RefSeq, Nov 2009].
ENSG00000197771	MCMBP	chr10	normal_specific	NA	NA	0.0920366	0.0353449	minichromosome maintenance complex binding protein	This gene encodes a protein which is a component of the hexameric minichromosome maintenance (MCM) complex which regulates initiation and elongation of DNA. Multiple transcript variants encoding different isoforms have been found for this gene. [provided by RefSeq, Jan 2012].
ENSG00000164219	PGGT1B	chr5	normal_specific	NA	NA	0.0938118	0.0354314	protein geranylgeranyltransferase type I subunit beta	Protein geranylgeranyltransferase type I (GGTase-I) transfers a geranylgeranyl group to the cysteine residue of candidate proteins containing a C-terminal CAAX motif in which 'A' is an aliphatic amino acid and 'X' is leucine (summarized by Zhang et al., 1994 [PubMed 8106351]). The enzyme is composed of a 48-kD alpha subunit (FNTA; MIM 134635) and a 43-kD beta subunit, encoded by the PGGT1B gene. …
ENSG00000171425	ZNF581	chr19	normal_specific	NA	NA	-0.134487	0.0354314	zinc finger protein 581	NA
ENSG00000100365	NCF4	chr22	normal_specific	NA	NA	-0.307024	0.0357503	neutrophil cytosolic factor 4	The protein encoded by this gene is a cytosolic regulatory component of the superoxide-producing phagocyte NADPH-oxidase, a multicomponent enzyme system important for host defense. This protein is preferentially expressed in cells of myeloid lineage. It interacts primarily with neutrophil cytosolic factor 2 (NCF2/p67-phox) to form a complex with neutrophil cytosolic factor 1 (NCF1/p47-phox), whic…
ENSG00000173715	C11orf80	chr11	normal_specific	NA	NA	-0.197298	0.0358175	chromosome 11 open reading frame 80	NA
ENSG00000174132	FAM174A	chr5	normal_specific	NA	NA	0.106874	0.0360393	family with sequence similarity 174 member A	NA
ENSG00000081377	CDC14B	chr9	normal_specific	NA	NA	0.0937705	0.0363725	cell division cycle 14B	The protein encoded by this gene is a member of the dual specificity protein tyrosine phosphatase family. This protein is highly similar to Saccharomyces cerevisiae Cdc14, a protein tyrosine phosphatase involved in the exit of cell mitosis and initiation of DNA replication, which suggests the role in cell cycle control. This protein has been shown to interact with and dephosphorylates tumor suppr…
ENSG00000117481	NSUN4	chr1	normal_specific	NA	NA	0.0779149	0.0363804	NOP2/Sun RNA methyltransferase 4	NA
ENSG00000155093	PTPRN2	chr7	normal_specific	NA	NA	0.17778	0.0364416	protein tyrosine phosphatase receptor type N2	This gene encodes a protein with sequence similarity to receptor-like protein tyrosine phosphatases. However, tyrosine phosphatase activity has not been experimentally validated for this protein. Studies of the rat ortholog suggest that the encoded protein may instead function as a phosphatidylinositol phosphatase with the ability to dephosphorylate phosphatidylinositol 3-phosphate and phosphatid…
ENSG00000165934	CPSF2	chr14	normal_specific	NA	NA	0.0887891	0.0366237	cleavage and polyadenylation specific factor 2	NA
ENSG00000001036	FUCA2	chr6	normal_specific	NA	NA	0.110487	0.0367286	alpha-L-fucosidase 2	This gene encodes a plasma alpha-L-fucosidase, which represents 10-20% of the total cellular fucosidase activity. The protein is a member of the glycosyl hydrolase 29 family, and catalyzes the hydrolysis of the alpha-1,6-linked fucose joined to the reducing-end N-acetylglucosamine of the carbohydrate moieties of glycoproteins. This enzyme is essential for Helicobacter pylori adhesion to human gas…
ENSG00000115085	ZAP70	chr2	normal_specific	NA	NA	-0.333114	0.0367286	zeta chain of T cell receptor associated protein kinase 70	This gene encodes an enzyme belonging to the protein tyrosine kinase family, and it plays a role in T-cell development and lymphocyte activation. This enzyme, which is phosphorylated on tyrosine residues upon T-cell antigen receptor (TCR) stimulation, functions in the initial step of TCR-mediated signal transduction in combination with the Src family kinases, Lck and Fyn. This enzyme is also esse…
ENSG00000121691	CAT	chr11	normal_specific	NA	NA	-0.210748	0.0367286	catalase	This gene encodes catalase, a key antioxidant enzyme in the bodies defense against oxidative stress. Catalase is a heme enzyme that is present in the peroxisome of nearly all aerobic cells. Catalase converts the reactive oxygen species hydrogen peroxide to water and oxygen and thereby mitigates the toxic effects of hydrogen peroxide. Oxidative stress is hypothesized to play a role in the developm…
ENSG00000137710	RDX	chr11	normal_specific	NA	NA	0.096378	0.0367286	radixin	Radixin is a cytoskeletal protein that may be important in linking actin to the plasma membrane. It is highly similar in sequence to both ezrin and moesin. The radixin gene has been localized by fluorescence in situ hybridization to 11q23. A truncated version representing a pseudogene (RDXP2) was assigned to Xp21.3. Another pseudogene that seemed to lack introns (RDXP1) was mapped to 11p by South…
ENSG00000146416	AIG1	chr6	normal_specific	NA	NA	0.119199	0.0367286	androgen induced 1	NA
ENSG00000162086	ZNF75A	chr16	normal_specific	NA	NA	0.127086	0.0367286	zinc finger protein 75a	NA
ENSG00000166881	TMEM194A	chr12	normal_specific	NA	NA	-0.159056	0.0367286	nuclear envelope integral membrane protein 1	NA
ENSG00000183020	AP2A2	chr11	normal_specific	NA	NA	-0.0905017	0.0367286	adaptor related protein complex 2 subunit alpha 2	The protein encoded by this gene is a subunit of the AP-2 adaptor protein complex, which is involved in linking lipid and protein membrane components with the clathrin lattice. This interaction supports the formation of clathrin-coated vesicles, and the encoded subunit aids in the process by binding polyphosphoinositide-containing lipids in the cell membrane. [provided by RefSeq, Nov 2016].
ENSG00000169570	DTWD2	chr5	normal_specific	NA	NA	0.156615	0.0367398	DTW domain containing 2	NA
ENSG00000130489	SCO2	chr22	normal_specific	NA	NA	-0.195143	0.0368257	NA	NA
ENSG00000175215	CTDSP2	chr12	normal_specific	NA	NA	-0.0969088	0.0369768	CTD small phosphatase 2	NA
ENSG00000101282	RSPO4	chr20	normal_specific	NA	NA	-0.323251	0.0371449	R-spondin 4	This gene encodes a member of the R-spondin family of proteins that share a common domain organization consisting of a signal peptide, cysteine-rich/furin-like domain, thrombospondin domain and a C-terminal basic region. The encoded protein may be involved in activation of Wnt/beta-catenin signaling pathways. Mutations in this gene are associated with anonychia congenital. Alternate splicing resu…
ENSG00000140718	FTO	chr16	normal_specific	NA	NA	0.0804771	0.0375679	FTO alpha-ketoglutarate dependent dioxygenase	This gene is a nuclear protein of the AlkB related non-haem iron and 2-oxoglutarate-dependent oxygenase superfamily but the exact physiological function of this gene is not known. Other non-heme iron enzymes function to reverse alkylated DNA and RNA damage by oxidative demethylation. Studies in mice and humans indicate a role in nervous and cardiovascular systems and a strong association with bod…
ENSG00000116641	DOCK7	chr1	normal_specific	NA	NA	0.0946788	0.037684	dedicator of cytokinesis 7	The protein encoded by this gene is a guanine nucleotide exchange factor (GEF) that plays a role in axon formation and neuronal polarization. The encoded protein displays GEF activity toward RAC1 and RAC3 Rho small GTPases but not toward CDC42. Several transcript variants encoding different isoforms have been found for this gene. [provided by RefSeq, Dec 2012].
ENSG00000243811	APOBEC3D	chr22	normal_specific	NA	NA	-0.277267	0.037684	apolipoprotein B mRNA editing enzyme catalytic subunit 3D	This gene is a member of the cytidine deaminase gene family. It is one of a group of related genes found in a cluster, thought to result from gene duplication, on chromosome 22. Members of the cluster encode proteins that are structurally and functionally related to the C to U RNA-editing cytidine deaminase APOBEC1 and inhibit retroviruses, such as HIV, by deaminating cytosine residues in nascent…
ENSG00000149311	ATM	chr11	normal_specific	NA	NA	-0.1439	0.0378014	ATM serine/threonine kinase	The protein encoded by this gene belongs to the PI3/PI4-kinase family. This protein is an important cell cycle checkpoint kinase that phosphorylates; thus, it functions as a regulator of a wide variety of downstream proteins, including tumor suppressor proteins p53 and BRCA1, checkpoint kinase CHK2, checkpoint proteins RAD17 and RAD9, and DNA repair protein NBS1. This protein and the closely rela…
ENSG00000124357	NAGK	chr2	normal_specific	NA	NA	-0.0945618	0.0379606	N-acetylglucosamine kinase	This gene encodes a member of the N-acetylhexosamine kinase family. The encoded protein catalyzes the conversion of N-acetyl-D-glucosamine to N-acetyl-D-glucosamine 6-phosphate, and is the major mammalian enzyme which recovers amino sugars. [provided by RefSeq, Nov 2011].
ENSG00000097033	SH3GLB1	chr1	normal_specific	NA	NA	0.0718491	0.0382454	SH3 domain containing GRB2 like, endophilin B1	This gene encodes a SRC homology 3 domain-containing protein. The encoded protein interacts with the proapoptotic member of the Bcl-2 family, Bcl-2-associated X protein (Bax) and may be involved in regulating apoptotic signaling pathways. This protein may also be involved in maintaining mitochondrial morphology. Alternate splicing results in multiple transcript variants. [provided by RefSeq, Sep …
ENSG00000106052	TAX1BP1	chr7	normal_specific	NA	NA	0.0893992	0.0382454	Tax1 binding protein 1	This gene encodes a HTLV-1 tax1 binding protein. The encoded protein interacts with TNFAIP3, and inhibits TNF-induced apoptosis by mediating the TNFAIP3 anti-apoptotic activity. Degradation of this protein by caspase-3-like family proteins is associated with apoptosis induced by TNF. This protein may also have a role in the inhibition of inflammatory signaling pathways. Alternatively spliced tran…
ENSG00000125378	BMP4	chr14	normal_specific	NA	NA	-0.234556	0.0382454	bone morphogenetic protein 4	This gene encodes a secreted ligand of the TGF-beta (transforming growth factor-beta) superfamily of proteins. Ligands of this family bind various TGF-beta receptors leading to recruitment and activation of SMAD family transcription factors that regulate gene expression. The encoded preproprotein is proteolytically processed to generate each subunit of the disulfide-linked homodimer. This protein…
ENSG00000166922	SCG5	chr15	normal_specific	NA	NA	0.415057	0.0382454	secretogranin V	This gene encodes a secreted chaperone protein that prevents the aggregation of other secreted proteins, including proteins that are associated with neurodegenerative and metabolic disease. The encoded protein may be best known for its role in the trafficking and activation of prohormone convertase PC2 (encoded by Gene ID: 5126). Phosphorylation of the encoded protein has been shown to have an in…
ENSG00000168071	CCDC88B	chr11	normal_specific	NA	NA	-0.300316	0.0382454	coiled-coil domain containing 88B	This gene encodes a member of the hook-related protein family. Members of this family are characterized by an N-terminal potential microtubule binding domain, a central coiled-coiled and a C-terminal Hook-related domain. The encoded protein may be involved in linking organelles to microtubules. [provided by RefSeq, Oct 2009].
ENSG00000128050	PAICS	chr4	normal_specific	NA	NA	0.125824	0.0384712	phosphoribosylaminoimidazole carboxylase and phosphoribosylaminoimidazolesuccinocarboxamide synthase	This gene encodes a bifunctional enzyme containing phosphoribosylaminoimidazole carboxylase activity in its N-terminal region and phosphoribosylaminoimidazole succinocarboxamide synthetase in its C-terminal region. It catalyzes steps 6 and 7 of purine biosynthesis. The gene is closely linked and divergently transcribed with a locus that encodes an enzyme in the same pathway, and transcription of …
ENSG00000213654	GPSM3	chr6	normal_specific	NA	NA	-0.227503	0.0385723	G protein signaling modulator 3	NA
ENSG00000125633	CCDC93	chr2	normal_specific	NA	NA	-0.0956228	0.0387133	coiled-coil domain containing 93	NA
ENSG00000106299	WASL	chr7	normal_specific	NA	NA	0.0803179	0.0387325	WASP like actin nucleation promoting factor	This gene encodes a member of the Wiskott-Aldrich syndrome (WAS) protein family. Wiskott-Aldrich syndrome proteins share similar domain structure, and associate with a variety of signaling molecules to alter the actin cytoskeleton. The encoded protein is highly expressed in neural tissues, and interacts with several proteins involved in cytoskeletal organization, including cell division control p…
ENSG00000115165	CYTIP	chr2	normal_specific	NA	NA	-0.348396	0.0387325	cytohesin 1 interacting protein	The protein encoded by this gene contains 2 leucine zipper domains and a putative C-terminal nuclear targeting signal, but does not have any hydrophobic regions. This protein is expressed weakly in resting NK and T cells. The encoded protein modulates the activation of ARF genes by CYTH1. This protein interacts with CYTH1 and SNX27 proteins and may act to sequester CYTH1 protein in the cytoplasm.…
ENSG00000105875	WDR91	chr7	normal_specific	NA	NA	-0.120004	0.0389741	WD repeat domain 91	NA
ENSG00000142327	RNPEPL1	chr2	normal_specific	NA	NA	-0.129114	0.0389741	arginyl aminopeptidase like 1	NA
ENSG00000163516	ANKZF1	chr2	normal_specific	NA	NA	-0.128965	0.0389741	ankyrin repeat and zinc finger peptidyl tRNA hydrolase 1	NA
ENSG00000234745	HLA-B	chr6	normal_specific	NA	NA	-0.202719	0.0392661	major histocompatibility complex, class I, B	HLA-B belongs to the HLA class I heavy chain paralogues. This class I molecule is a heterodimer consisting of a heavy chain and a light chain (beta-2 microglobulin). The heavy chain is anchored in the membrane. Class I molecules play a central role in the immune system by presenting peptides derived from the endoplasmic reticulum lumen. They are expressed in nearly all cells. The heavy chain is a…
ENSG00000134698	AGO4	chr1	normal_specific	NA	NA	-0.101649	0.039567	argonaute RISC component 4	This gene encodes a member of the Argonaute family of proteins which contain PAZ and PIWI domains and play an integral role in RNA interference and short-interfering-RNA-mediated gene silencing. This gene is located on chromosome 1 in a cluster of related family members. [provided by RefSeq, Mar 2017].
ENSG00000165457	FOLR2	chr11	normal_specific	NA	NA	-0.425151	0.039567	folate receptor beta	The protein encoded by this gene is a member of the folate receptor (FOLR) family, and these genes exist in a cluster on chromosome 11. Members of this gene family have a high affinity for folic acid and for several reduced folic acid derivatives, and they mediate delivery of 5-methyltetrahydrofolate to the interior of cells. This protein has a 68% and 79% sequence homology with the FOLR1 and FOL…
ENSG00000175895	PLEKHF2	chr8	normal_specific	NA	NA	-0.115989	0.0406426	pleckstrin homology and FYVE domain containing 2	NA
ENSG00000073969	NSF	chr17	normal_specific	NA	NA	0.0938208	0.0407461	N-ethylmaleimide sensitive factor, vesicle fusing ATPase	NA
ENSG00000103018	CYB5B	chr16	normal_specific	NA	NA	0.0639107	0.0408545	cytochrome b5 type B	NA
ENSG00000138085	ATRAID	chr2	normal_specific	NA	NA	0.0974328	0.0409363	all-trans retinoic acid induced differentiation factor	This gene is thought to be involved in apoptosis, and may also be involved in hematopoietic development and differentiation. The use of alternative splice sites and promotors result in multiple transcript variants encoding different isoforms.[provided by RefSeq, Dec 2009].
ENSG00000164951	PDP1	chr8	normal_specific	NA	NA	-0.132617	0.0409363	pyruvate dehyrogenase phosphatase catalytic subunit 1	Pyruvate dehydrogenase (E1) is one of the three components (E1, E2, and E3) of the large pyruvate dehydrogenase complex. Pyruvate dehydrogenase kinases catalyze phosphorylation of serine residues of E1 to inactivate the E1 component and inhibit the complex. Pyruvate dehydrogenase phosphatases catalyze the dephosphorylation and activation of the E1 component to reverse the effects of pyruvate dehy…
ENSG00000166710	B2M	chr15	normal_specific	NA	NA	-0.152039	0.0411277	beta-2-microglobulin	This gene encodes a serum protein found in association with the major histocompatibility complex (MHC) class I heavy chain on the surface of nearly all nucleated cells. The protein has a predominantly beta-pleated sheet structure that can form amyloid fibrils in some pathological conditions. The encoded antimicrobial protein displays antibacterial activity in amniotic fluid. A mutation in this ge…
ENSG00000153446	C16orf89	chr16	normal_specific	NA	NA	0.233552	0.0414285	chromosome 16 open reading frame 89	This gene is expressed predominantly in the thyroid. Based on expression patterns similar to thyroid transcription factors and proteins, this gene may function in the development and function of the thyroid. Multiple transcript variants encoding different isoforms have been found for this gene. [provided by RefSeq, Oct 2011].
ENSG00000154803	FLCN	chr17	normal_specific	NA	NA	-0.167972	0.0414285	folliculin	This gene is located within the Smith-Magenis syndrome region on chromosome 17. Mutations in this gene are associated with Birt-Hogg-Dube syndrome, which is characterized by fibrofolliculomas, renal tumors, lung cysts, and pneumothorax. Alternative splicing of this gene results in two transcript variants encoding different isoforms. [provided by RefSeq, Jul 2008].
ENSG00000152413	HOMER1	chr5	normal_specific	NA	NA	0.160057	0.0414742	homer scaffold protein 1	This gene encodes a member of the homer family of dendritic proteins. Members of this family regulate group 1 metabotrophic glutamate receptor function. [provided by RefSeq, Jul 2008].
ENSG00000125744	RTN2	chr19	normal_specific	NA	NA	-0.195395	0.0415056	reticulon 2	This gene belongs to the family of reticulon encoding genes. Reticulons are necessary for proper generation of tubular endoplasmic reticulum and likely play a role in intracellular vesicular transport. Alternatively spliced transcript variants encoding different isoforms have been identified. Mutations at this locus have been associated with autosomal dominant spastic paraplegia-12. [provided by …
ENSG00000101336	HCK	chr20	normal_specific	NA	NA	-0.316461	0.0415228	HCK proto-oncogene, Src family tyrosine kinase	The protein encoded by this gene is a member of the Src family of tyrosine kinases. This protein is primarily hemopoietic, particularly in cells of the myeloid and B-lymphoid lineages. It may help couple the Fc receptor to the activation of the respiratory burst. In addition, it may play a role in neutrophil migration and in the degranulation of neutrophils. Multiple isoforms with different subce…
ENSG00000240230	COX19	chr7	normal_specific	NA	NA	-0.0997228	0.0415228	cytochrome c oxidase assembly factor COX19	COX19 encodes a cytochrome c oxidase (COX)-assembly protein. The S. cerevisiae Cox19 protein may play a role in metal transport to the mitochondrial intermembrane space and assembly of complex IV of the mitochondrial respiratory chain (Sacconi et al., 2005 [PubMed 16212937]).[supplied by OMIM, Mar 2008].
ENSG00000125166	GOT2	chr16	normal_specific	NA	NA	0.11441	0.0415241	glutamic-oxaloacetic transaminase 2	Glutamic-oxaloacetic transaminase is a pyridoxal phosphate-dependent enzyme which exists in cytoplasmic and inner-membrane mitochondrial forms, GOT1 and GOT2, respectively. GOT plays a role in amino acid metabolism and the urea and tricarboxylic acid cycles. The two enzymes are homodimeric and show close homology. Two transcript variants encoding different isoforms have been found for this gene. …
ENSG00000138400	MDH1B	chr2	normal_specific	NA	NA	0.22629	0.0415241	malate dehydrogenase 1B	NA
ENSG00000155903	RASA2	chr3	normal_specific	NA	NA	-0.126205	0.0419455	RAS p21 protein activator 2	The protein encoded by this gene is member of the GAP1 family of GTPase-activating proteins. The gene product stimulates the GTPase activity of normal RAS p21 but not its oncogenic counterpart. Acting as a suppressor of RAS function, the protein enhances the weak intrinsic GTPase activity of RAS proteins resulting in the inactive GDP-bound form of RAS, thereby allowing control of cellular prolife…
ENSG00000136146	MED4	chr13	normal_specific	NA	NA	0.069769	0.0420007	mediator complex subunit 4	This gene encodes a component of the Mediator complex. The Mediator complex interacts with DNA-binding gene-specific transcription factors to modulate transcription by RNA polymerase II. Alternatively spliced transcript variants encoding multiple isoforms have been observed for this gene. [provided by RefSeq, Jul 2012].
ENSG00000164114	MAP9	chr4	normal_specific	NA	NA	0.118372	0.0420007	microtubule associated protein 9	ASAP is a microtubule-associated protein required for spindle function, mitotic progression, and cytokinesis (Saffin et al., 2005 [PubMed 16049101]).[supplied by OMIM, Mar 2008].
ENSG00000164199	GPR98	chr5	normal_specific	NA	NA	-0.347524	0.0420782	adhesion G protein-coupled receptor V1	This gene encodes a member of the G-protein coupled receptor superfamily. The encoded protein contains a 7-transmembrane receptor domain, binds calcium and is expressed in the central nervous system. Mutations in this gene are associated with Usher syndrome 2 and familial febrile seizures. Several alternatively spliced transcripts have been described. [provided by RefSeq, Jul 2008].
ENSG00000091592	NLRP1	chr17	normal_specific	NA	NA	-0.157326	0.0421495	NLR family pyrin domain containing 1	This gene encodes a member of the Ced-4 family of apoptosis proteins. Ced-family members contain a caspase recruitment domain (CARD) and are known to be key mediators of programmed cell death. The encoded protein contains a distinct N-terminal pyrin-like motif, which is possibly involved in protein-protein interactions. This protein interacts strongly with caspase 2 and weakly with caspase 9. Ove…
ENSG00000112619	PRPH2	chr6	normal_specific	NA	NA	0.343634	0.0421531	peripherin 2	The protein encoded by this gene is a member of the transmembrane 4 superfamily, also known as the tetraspanin family. Most of these members are cell-surface proteins that are characterized by the presence of four hydrophobic domains. The proteins mediate signal transduction events that play a role in the regulation of cell development, activation, growth and motility. This encoded protein is a c…
ENSG00000167767	KRT80	chr12	normal_specific	NA	NA	-0.461247	0.0423717	keratin 80	Keratins are intermediate filament proteins responsible for the structural integrity of epithelial cells and are subdivided into epithelial keratins and hair keratins. This gene's expression profile shows that it encodes a type II epithelial keratin, although structurally the encoded protein is more like a type II hair keratin. This protein is involved in cell differentiation, localizing near des…
ENSG00000157693	C9orf91	chr9	normal_specific	NA	NA	-0.150799	0.0427295	transmembrane protein 268	NA
ENSG00000162998	FRZB	chr2	normal_specific	NA	NA	-0.324685	0.0427295	frizzled related protein	The protein encoded by this gene is a secreted protein that is involved in the regulation of bone development. Defects in this gene are a cause of female-specific osteoarthritis (OA) susceptibility. [provided by RefSeq, Apr 2010].
ENSG00000150787	PTS	chr11	normal_specific	NA	NA	0.0958955	0.0428783	6-pyruvoyltetrahydropterin synthase	The enzyme encoded by this gene catalyzes the elimination of inorganic triphosphate from dihydroneopterin triphosphate, which is the second and irreversible step in the biosynthesis of tetrahydrobiopterin from GTP. Tetrahydrobiopterin, also known as BH(4), is an essential cofactor and regulator of various enzyme activities, including enzymes involved in serotonin biosynthesis and NO synthase acti…
ENSG00000196188	CTSE	chr1	normal_specific	NA	NA	-0.442886	0.0430587	cathepsin E	This gene encodes a member of the A1 family of peptidases. Alternative splicing of this gene results in multiple transcript variants. At least one of these variants encodes a preproprotein that is proteolytically processed to generate the mature enzyme. This enzyme, an aspartic endopeptidase, may be involved in antigen processing and the maturation of secretory proteins. Elevated expression of th…
ENSG00000110696	C11orf58	chr11	normal_specific	NA	NA	0.0723008	0.0431154	chromosome 11 open reading frame 58	NA
ENSG00000110719	TCIRG1	chr11	normal_specific	NA	NA	-0.140682	0.0431154	T cell immune regulator 1, ATPase H+ transporting V0 subunit a3	This gene encodes a subunit of a large protein complex known as a vacuolar H+-ATPase (V-ATPase). The protein complex acts as a pump to move protons across the membrane. This movement of protons helps regulate the pH of cells and their surrounding environment. V-ATPase dependent organelle acidification is necessary for such intracellular processes as protein sorting, zymogen activation, and recept…
ENSG00000143149	ALDH9A1	chr1	normal_specific	NA	NA	0.145807	0.0431154	aldehyde dehydrogenase 9 family member A1	This protein belongs to the aldehyde dehydrogenase family of proteins. It has a high activity for oxidation of gamma-aminobutyraldehyde and other amino aldehydes. The enzyme catalyzes the dehydrogenation of gamma-aminobutyraldehyde to gamma-aminobutyric acid (GABA). This isozyme is a tetramer of identical 54-kD subunits. [provided by RefSeq, Jul 2008].
ENSG00000163638	ADAMTS9	chr3	normal_specific	NA	NA	0.404823	0.0431154	ADAM metallopeptidase with thrombospondin type 1 motif 9	This gene encodes a member of the ADAMTS (a disintegrin and metalloproteinase with thrombospondin motifs) protein family. Members of the family share several distinct protein modules, including a propeptide region, a metalloproteinase domain, a disintegrin-like domain, and a thrombospondin type 1 (TS) motif. Individual members of this family differ in the number of C-terminal TS motifs, and some …
ENSG00000072422	RHOBTB1	chr10	normal_specific	NA	NA	-0.172293	0.0431808	Rho related BTB domain containing 1	The protein encoded by this gene belongs to the Rho family of the small GTPase superfamily. It contains a GTPase domain, a proline-rich region, a tandem of 2 BTB (broad complex, tramtrack, and bric-a-brac) domains, and a conserved C-terminal region. The protein plays a role in small GTPase-mediated signal transduction and the organization of the actin filament system. Alternate splicing results i…
ENSG00000091317	CMTM6	chr3	normal_specific	NA	NA	0.151792	0.0431808	CKLF like MARVEL transmembrane domain containing 6	This gene belongs to the chemokine-like factor gene superfamily, a novel family that is similar to the chemokine and transmembrane 4 superfamilies. This gene is one of several chemokine-like factor genes located in a cluster on chromosome 3. This gene is widely expressed in many tissues, but the exact function of the encoded protein is unknown. [provided by RefSeq, Jul 2008].
ENSG00000095397	DFNB31	chr9	normal_specific	NA	NA	-0.189667	0.0431808	whirlin	This gene is thought to function in the organization and stabilization of sterocilia elongation and actin cystoskeletal assembly, based on studies of the related mouse gene. Mutations in this gene have been associated with autosomal recessive non-syndromic deafness and Usher Syndrome. Alternative splicing results in multiple transcript variants. [provided by RefSeq, Nov 2016].
ENSG00000096063	SRPK1	chr6	normal_specific	NA	NA	0.10911	0.0431808	SRSF protein kinase 1	This gene encodes a serine/arginine protein kinase specific for the SR (serine/arginine-rich domain) family of splicing factors. The protein localizes to the nucleus and the cytoplasm. It is thought to play a role in regulation of both constitutive and alternative splicing by regulating intracellular localization of splicing factors. Alternative splicing of this gene results in multiple transcrip…
ENSG00000118217	ATF6	chr1	normal_specific	NA	NA	0.0901428	0.0431808	activating transcription factor 6	This gene encodes a transcription factor that activates target genes for the unfolded protein response (UPR) during endoplasmic reticulum (ER) stress. Although it is a transcription factor, this protein is unusual in that it is synthesized as a transmembrane protein that is embedded in the ER. It functions as an ER stress sensor/transducer, and following ER stress-induced proteolysis, it function…
ENSG00000137462	TLR2	chr4	normal_specific	NA	NA	-0.262493	0.0431808	toll like receptor 2	The protein encoded by this gene is a member of the Toll-like receptor (TLR) family which plays a fundamental role in pathogen recognition and activation of innate immunity. TLRs are highly conserved from Drosophila to humans and share structural and functional similarities. This protein is a cell-surface protein that can form heterodimers with other TLR family members to recognize conserved mole…
ENSG00000163131	CTSS	chr1	normal_specific	NA	NA	-0.250227	0.0431808	cathepsin S	The protein encoded by this gene, a member of the peptidase C1 family, is a lysosomal cysteine proteinase that may participate in the degradation of antigenic proteins to peptides for presentation on MHC class II molecules. The encoded protein can function as an elastase over a broad pH range in alveolar macrophages. Alternatively spliced transcript variants encoding distinct isoforms have been f…
ENSG00000168918	INPP5D	chr2	normal_specific	NA	NA	-0.228798	0.0431808	inositol polyphosphate-5-phosphatase D	This gene is a member of the inositol polyphosphate-5-phosphatase (INPP5) family and encodes a protein with an N-terminal SH2 domain, an inositol phosphatase domain, and two C-terminal protein interaction domains. Expression of this protein is restricted to hematopoietic cells where its movement from the cytosol to the plasma membrane is mediated by tyrosine phosphorylation. At the plasma membran…
ENSG00000175792	RUVBL1	chr3	normal_specific	NA	NA	0.107855	0.0431808	RuvB like AAA ATPase 1	This gene encodes a protein that has both DNA-dependent ATPase and DNA helicase activities and belongs to the ATPases associated with diverse cellular activities (AAA+) protein family. The encoded protein associates with several multisubunit transcriptional complexes and with protein complexes involved in both ATP-dependent remodeling and histone modification. Alternate splicing results in multip…
ENSG00000178104	PDE4DIP	chr1	normal_specific	NA	NA	-0.139295	0.0431808	phosphodiesterase 4D interacting protein	The protein encoded by this gene serves to anchor phosphodiesterase 4D to the Golgi/centrosome region of the cell. Defects in this gene may be a cause of myeloproliferative disorder (MBD) associated with eosinophilia. Several transcript variants encoding different isoforms have been found for this gene. [provided by RefSeq, Aug 2010].
ENSG00000179023	KLHDC7A	chr1	normal_specific	NA	NA	0.434484	0.0431808	kelch domain containing 7A	NA
ENSG00000187955	COL14A1	chr8	normal_specific	NA	NA	0.233823	0.0431808	collagen type XIV alpha 1 chain	This gene encodes the alpha chain of type XIV collagen, a member of the FACIT (fibril-associated collagens with interrupted triple helices) collagen family. Type XIV collagen interacts with the fibril surface and is involved in the regulation of fibrillogenesis. [provided by RefSeq, Jan 2013].
ENSG00000198168	SVIP	chr11	normal_specific	NA	NA	0.1261	0.0432102	small VCP interacting protein	Endoplasmic reticulum-associated degradation (ERAD) is the pathway by which misfolded proteins in the endoplasmic reticulum are targeted to the proteasome for degradation. Multiple specialized proteins interact with one another during ERAD to complete this process. The protein encoded by this gene is an inhibitor of ERAD, functioning to disrupt the interaction of these protein components. This do…
ENSG00000178971	CTC1	chr17	normal_specific	NA	NA	-0.108306	0.0435564	CST telomere replication complex component 1	This gene encodes a component of the CST complex. This complex plays an essential role in protecting telomeres from degradation. This protein also forms a heterodimer with the CST complex subunit STN1 to form the enzyme alpha accessory factor. This enzyme regulates DNA replication. Mutations in this gene are the cause of cerebroretinal microangiopathy with calcifications and cysts. Alternate spli…
ENSG00000185477	GPRIN3	chr4	normal_specific	NA	NA	-0.214985	0.0435564	GPRIN family member 3	NA
ENSG00000101350	KIF3B	chr20	normal_specific	NA	NA	0.083981	0.0435973	kinesin family member 3B	The protein encoded by this gene acts as a heterodimer with kinesin family member 3A to aid in chromosome movement during mitosis and meiosis. The encoded protein is a plus end-directed microtubule motor and can interact with the SMC3 subunit of the cohesin complex. In addition, the encoded protein may be involved in the intracellular movement of membranous organelles. This protein and kinesin fa…
ENSG00000169100	SLC25A6	chrX	normal_specific	NA	NA	0.122539	0.0435973	solute carrier family 25 member 6	This gene is a member of the mitochondrial carrier subfamily of solute carrier protein genes. The product of this gene functions as a gated pore that translocates ADP from the cytoplasm into the mitochondrial matrix and ATP from the mitochondrial matrix into the cytoplasm. The protein is implicated in the function of the permability transition pore complex (PTPC), which regulates the release of m…
ENSG00000125354	2006-09-01	chrX	normal_specific	NA	NA	-0.189592	0.0437656	septin 6	This gene is a member of the septin family of GTPases. Members of this family are required for cytokinesis. One version of pediatric acute myeloid leukemia is the result of a reciprocal translocation between chromosomes 11 and X, with the breakpoint associated with the genes encoding the mixed-lineage leukemia and septin 2 proteins. This gene encodes four transcript variants encoding three distin…
ENSG00000091073	DTX2	chr7	normal_specific	NA	NA	-0.102401	0.043821	deltex E3 ubiquitin ligase 2	DTX2 functions as an E3 ubiquitin ligase (Takeyama et al., 2003 [PubMed 12670957]).[supplied by OMIM, Nov 2009].
ENSG00000115956	PLEK	chr2	normal_specific	NA	NA	-0.334895	0.043821	pleckstrin	NA
ENSG00000139044	B4GALNT3	chr12	normal_specific	NA	NA	-0.228043	0.043821	beta-1,4-N-acetyl-galactosaminyltransferase 3	B4GALNT3 transfers N-acetylgalactosamine (GalNAc) onto glucosyl residues to form N,N-prime-diacetyllactosediamine (LacdiNAc, or LDN), a unique terminal structure of cell surface N-glycans (Ikehara et al., 2006 [PubMed 16728562]).[supplied by OMIM, Aug 2008].
ENSG00000173209	AHSA2	chr2	normal_specific	NA	NA	-0.15778	0.0439006	activator of HSP90 ATPase homolog 2, pseudogene	NA
ENSG00000179583	CIITA	chr16	normal_specific	NA	NA	-0.306613	0.0440783	class II major histocompatibility complex transactivator	This gene encodes a protein with an acidic transcriptional activation domain, 4 LRRs (leucine-rich repeats) and a GTP binding domain. The protein is located in the nucleus and acts as a positive regulator of class II major histocompatibility complex gene transcription, and is referred to as the 'master control factor' for the expression of these genes. The protein also binds GTP and uses GTP bind…
ENSG00000147416	ATP6V1B2	chr8	normal_specific	NA	NA	-0.0907384	0.0442327	ATPase H+ transporting V1 subunit B2	This gene encodes a component of vacuolar ATPase (V-ATPase), a multisubunit enzyme that mediates acidification of eukaryotic intracellular organelles. V-ATPase dependent organelle acidification is necessary for such intracellular processes as protein sorting, zymogen activation, receptor-mediated endocytosis, and synaptic vesicle proton gradient generation. V-ATPase is composed of a cytosolic V1 …
ENSG00000107521	HPS1	chr10	normal_specific	NA	NA	-0.0799555	0.0442537	HPS1 biogenesis of lysosomal organelles complex 3 subunit 1	This gene encodes a protein that may play a role in organelle biogenesis associated with melanosomes, platelet dense granules, and lysosomes. The encoded protein is a component of three different protein complexes termed biogenesis of lysosome-related organelles complex (BLOC)-3, BLOC4, and BLOC5. Mutations in this gene are associated with Hermansky-Pudlak syndrome type 1. Alternative splicing re…
ENSG00000106609	TMEM248	chr7	normal_specific	NA	NA	0.0543642	0.0443243	transmembrane protein 248	NA
ENSG00000151247	EIF4E	chr4	normal_specific	NA	NA	0.0888226	0.0443243	eukaryotic translation initiation factor 4E	The protein encoded by this gene is a component of the eukaryotic translation initiation factor 4F complex, which recognizes the 7-methylguanosine cap structure at the 5' end of messenger RNAs. The encoded protein aids in translation initiation by recruiting ribosomes to the 5'-cap structure. Association of this protein with the 4F complex is the rate-limiting step in translation initiation. This…
ENSG00000213064	SFT2D2	chr1	normal_specific	NA	NA	-0.0791411	0.0443431	SFT2 domain containing 2	NA
ENSG00000111261	MANSC1	chr12	normal_specific	NA	NA	0.102822	0.0445572	MANSC domain containing 1	NA
ENSG00000109133	TMEM33	chr4	normal_specific	NA	NA	0.083759	0.0446827	transmembrane protein 33	NA
ENSG00000132603	NIP7	chr16	normal_specific	NA	NA	0.148287	0.0446827	nucleolar pre-rRNA processing protein NIP7	NA
ENSG00000141562	NARF	chr17	normal_specific	NA	NA	-0.120326	0.0447811	nuclear prelamin A recognition factor	Several proteins have been found to be prenylated and methylated at their carboxyl-terminal ends. Prenylation was initially believed to be important only for membrane attachment. However, another role for prenylation appears to be its importance in protein-protein interactions. The only nuclear proteins known to be prenylated in mammalian cells are prelamin A- and B-type lamins. Prelamin A is far…
ENSG00000162511	LAPTM5	chr1	normal_specific	NA	NA	-0.243603	0.0448822	lysosomal protein transmembrane 5	This gene encodes a transmembrane receptor that is associated with lysosomes. The encoded protein, also known as E3 protein, may play a role in hematopoiesis. [provided by RefSeq, Feb 2009].
ENSG00000135407	AVIL	chr12	normal_specific	NA	NA	-0.331785	0.0454032	advillin	The protein encoded by this gene is a member of the gelsolin/villin family of actin regulatory proteins. This protein has structural similarity to villin. It binds actin and may play a role in the development of neuronal cells that form ganglia. [provided by RefSeq, Jul 2008].
ENSG00000101346	POFUT1	chr20	normal_specific	NA	NA	0.0871269	0.0456838	protein O-fucosyltransferase 1	This gene encodes a member of the glycosyltransferase O-Fuc family. This enzyme adds O-fucose through an O-glycosidic linkage to conserved serine or threonine residues in the epidermal growth factor-like repeats of a number of cell surface and secreted proteins. O-fucose glycans are involved in ligand-induced receptor signaling. Alternative splicing of this gene results in two transcript variants…
ENSG00000247516	MIR4458HG	chr5	normal_specific	NA	NA	0.154767	0.0457335	MIR4458 host gene	NA
ENSG00000011295	TTC19	chr17	normal_specific	NA	NA	0.0668484	0.0459204	tetratricopeptide repeat domain 19	This gene encodes a protein with a tetratricopeptide repeat (TPR) domain containing several TPRs of about 34 aa each. These repeats are found in a variety of organisms including bacteria, fungi and plants, and are involved in a variety of functions including protein-protein interactions. This protein is embedded in the inner mitochondrial membrane and is involved in the formation of the mitochond…
ENSG00000204217	BMPR2	chr2	normal_specific	NA	NA	0.100954	0.0459204	bone morphogenetic protein receptor type 2	This gene encodes a member of the bone morphogenetic protein (BMP) receptor family of transmembrane serine/threonine kinases. The ligands of this receptor are BMPs, which are members of the TGF-beta superfamily. BMPs are involved in endochondral bone formation and embryogenesis. These proteins transduce their signals through the formation of heteromeric complexes of two different types of serine …
ENSG00000031081	ARHGAP31	chr3	normal_specific	NA	NA	0.129655	0.0459646	Rho GTPase activating protein 31	This gene encodes a GTPase-activating protein (GAP). A variety of cellular processes are regulated by Rho GTPases which cycle between an inactive form bound to GDP and an active form bound to GTP. This cycling between inactive and active forms is regulated by guanine nucleotide exchange factors and GAPs. The encoded protein is a GAP shown to regulate two GTPases involved in protein trafficking an…
ENSG00000048740	CELF2	chr10	normal_specific	NA	NA	-0.165105	0.0459646	CUGBP Elav-like family member 2	Members of the CELF/BRUNOL protein family contain two N-terminal RNA recognition motif (RRM) domains, one C-terminal RRM domain, and a divergent segment of 160-230 aa between the second and third RRM domains. Members of this protein family regulate pre-mRNA alternative splicing and may also be involved in mRNA editing, and translation. Alternative splicing results in multiple transcript variants …
ENSG00000143624	INTS3	chr1	normal_specific	NA	NA	-0.129225	0.0459646	integrator complex subunit 3	The protein encoded by this gene can form a complex with human single-strand DNA binding proteins 1 or 2 (hSSB1 and hSSB2) and other proteins to mediate genome stability and the DNA damage response. The encoded protein is also part of a multiprotein complex that interacts with the C-terminal domain of RNA polymerase II large subunit to help regulate processing of U1 and U2 small nuclear RNAs. [pr…
ENSG00000164162	ANAPC10	chr4	normal_specific	NA	NA	0.0809231	0.0459646	anaphase promoting complex subunit 10	ANAPC10 is a core subunit of the anaphase-promoting complex (APC), or cyclosome, a ubiquitin protein ligase that is essential for progression through the cell cycle. APC initiates sister chromatid separation by ubiquitinating the anaphase inhibitor securin (PTTG1; MIM 604147) and triggers exit from mitosis by ubiquitinating cyclin B (CCNB1; MIM 123836), the activating subunit of cyclin-dependent …
ENSG00000165152	TMEM246	chr9	normal_specific	NA	NA	0.197944	0.0459646	post-GPI attachment to proteins GalNAc transferase 4	NA
ENSG00000174460	ZCCHC12	chrX	normal_specific	NA	NA	0.817352	0.0459646	zinc finger CCHC-type containing 12	This gene encodes a downstream effector of bone morphogenetic protein (BMP) signalling. This protein contains a zinc finger domain and functions as a transcriptional coactivator. Variation in this gene may be associated with X-linked cognitive disability. Alternative splicing results in multiple transcript variants. [provided by RefSeq, Aug 2015].
ENSG00000177989	ODF3B	chr22	normal_specific	NA	NA	-0.231574	0.0459646	outer dense fiber of sperm tails 3B	NA
ENSG00000005302	MSL3	chrX	normal_specific	NA	NA	-0.0948225	0.0459985	MSL complex subunit 3	This gene encodes a nuclear protein that is similar to the product of the Drosophila male-specific lethal-3 gene. The Drosophila protein plays a critical role in a dosage-compensation pathway, which equalizes X-linked gene expression in males and females. Thus, the human protein is thought to play a similar function in chromatin remodeling and transcriptional regulation, and it has been found as …
ENSG00000179715	PCED1B	chr12	normal_specific	NA	NA	-0.240598	0.0461354	PC-esterase domain containing 1B	This gene encodes a protein that belongs to the GDSL/SGNH-like acyl-esterase family. Members of this family are hydrolases thought to function in modification of biopolymers on the cell surface. Alternate splicing results in multiple transcript variants encoding different isoforms. [provided by RefSeq, Jul 2013].
ENSG00000273329	RP11-448A19.1	chr7	normal_specific	NA	NA	0.135387	0.0462028	NA	NA
ENSG00000018869	ZNF582	chr19	normal_specific	NA	NA	0.112541	0.0462114	zinc finger protein 582	The protein encoded by this gene is a zing finger protein and putative transcription factor that is highly methylated in cervical cancers. Two transcript variants encoding different isoforms have been found for this gene. [provided by RefSeq, Feb 2016].
ENSG00000176105	YES1	chr18	normal_specific	NA	NA	0.111674	0.0462114	YES proto-oncogene 1, Src family tyrosine kinase	This gene is the cellular homolog of the Yamaguchi sarcoma virus oncogene. The encoded protein has tyrosine kinase activity and belongs to the src family of proteins. This gene lies in close proximity to thymidylate synthase gene on chromosome 18, and a corresponding pseudogene has been found on chromosome 22. [provided by RefSeq, Jul 2008].
ENSG00000087470	DNM1L	chr12	normal_specific	NA	NA	0.0893203	0.04644	dynamin 1 like	This gene encodes a member of the dynamin superfamily of GTPases. The encoded protein mediates mitochondrial and peroxisomal division, and is involved in developmentally regulated apoptosis and programmed necrosis. Dysfunction of this gene is implicated in several neurological disorders, including Alzheimer's disease. Mutations in this gene are associated with the autosomal dominant disorder, enc…
ENSG00000108557	RAI1	chr17	normal_specific	NA	NA	0.128004	0.04644	retinoic acid induced 1	This gene is located within the Smith-Magenis syndrome region on chromosome 17. It is highly similar to its mouse counterpart and is expressed at high levels mainly in neuronal tissues. The protein encoded by this gene includes a polymorphic polyglutamine tract in the N-terminal domain. Expression of the mouse counterpart in neurons is induced by retinoic acid. This gene is associated with both t…
ENSG00000139946	PELI2	chr14	normal_specific	NA	NA	-0.150129	0.04644	pellino E3 ubiquitin protein ligase family member 2	NA
ENSG00000168092	PAFAH1B2	chr11	normal_specific	NA	NA	0.0640078	0.0465879	platelet activating factor acetylhydrolase 1b catalytic subunit 2	Platelet-activating factor acetylhydrolase (PAFAH) inactivates platelet-activating factor (PAF) into acetate and LYSO-PAF. This gene encodes the beta subunit of PAFAH, the other subunits are alpha and gamma. Multiple alternatively spliced transcript variants have been described for this gene. [provided by RefSeq, Jan 2014].
ENSG00000162430	SEPN1	chr1	normal_specific	NA	NA	0.0875685	0.0469222	selenoprotein N	This gene encodes a glycoprotein that is localized in the endoplasmic reticulum. It plays an important role in cell protection against oxidative stress, and in the regulation of redox-related calcium homeostasis. Mutations in this gene are associated with early onset muscle disorders, referred to as SEPN1-related myopathy. SEPN1-related myopathy consists of 4 autosomal recessive disorders, origin…
ENSG00000197405	C5AR1	chr19	normal_specific	NA	NA	-0.319906	0.0469222	complement C5a receptor 1	NA
ENSG00000173598	NUDT4	chr12	normal_specific	NA	NA	0.141842	0.0472116	nudix hydrolase 4	The protein encoded by this gene regulates the turnover of diphosphoinositol polyphosphates. The turnover of these high-energy diphosphoinositol polyphosphates represents a molecular switching activity with important regulatory consequences. Molecular switching by diphosphoinositol polyphosphates may contribute to regulating intracellular trafficking. Several alternatively spliced transcript vari…
ENSG00000010327	STAB1	chr3	normal_specific	NA	NA	-0.25853	0.0472712	stabilin 1	This gene encodes a large, transmembrane receptor protein which may function in angiogenesis, lymphocyte homing, cell adhesion, or receptor scavenging. The protein contains 7 fasciclin, 16 epidermal growth factor (EGF)-like, and 2 laminin-type EGF-like domains as well as a C-type lectin-like hyaluronan-binding Link module. The protein is primarily expressed on sinusoidal endothelial cells of live…
ENSG00000104388	RAB2A	chr8	normal_specific	NA	NA	0.0806486	0.0474425	RAB2A, member RAS oncogene family	The protein encoded by this gene belongs to the Rab family, members of which are small molecular weight guanosine triphosphatases (GTPases) that contain highly conserved domains involved in GTP binding and hydrolysis. The Rabs are membrane-bound proteins, involved in vesicular fusion and trafficking. This protein is a resident of pre-Golgi intermediates, and is required for protein transport from…
ENSG00000086730	LAT2	chr7	normal_specific	NA	NA	-0.274411	0.0478212	linker for activation of T cells family member 2	This gene is one of the contiguous genes at 7q11.23 commonly deleted in Williams syndrome, a multisystem developmental disorder. This gene consists of at least 14 exons, and its alternative splicing generates 3 transcript variants, all encoding the same protein. [provided by RefSeq, Jul 2008].
ENSG00000099783	HNRNPM	chr19	normal_specific	NA	NA	0.080622	0.0478212	heterogeneous nuclear ribonucleoprotein M	This gene belongs to the subfamily of ubiquitously expressed heterogeneous nuclear ribonucleoproteins (hnRNPs). The hnRNPs are RNA binding proteins and they complex with heterogeneous nuclear RNA (hnRNA). These proteins are associated with pre-mRNAs in the nucleus and appear to influence pre-mRNA processing and other aspects of mRNA metabolism and transport. While all of the hnRNPs are present in…
ENSG00000104131	EIF3J	chr15	normal_specific	NA	NA	0.114769	0.0478334	eukaryotic translation initiation factor 3 subunit J	This gene encodes a core subunit of the eukaryotic initiation factor 3 complex, which participates in the initiation of translation by aiding in the recruitment of protein and mRNA components to the 40S ribosome. There are pseudogenes for this gene on chromosomes 1, 3, and 9. Alternative splicing results in multiple transcript variants encoding different isoforms. [provided by RefSeq, Sep 2013].
ENSG00000185305	ARL15	chr5	normal_specific	NA	NA	0.124946	0.0482932	ADP ribosylation factor like GTPase 15	NA
ENSG00000162407	PPAP2B	chr1	normal_specific	NA	NA	0.197252	0.0483476	phospholipid phosphatase 3	The protein encoded by this gene is a member of the phosphatidic acid phosphatase (PAP) family. PAPs convert phosphatidic acid to diacylglycerol, and function in de novo synthesis of glycerolipids as well as in receptor-activated signal transduction mediated by phospholipase D. This protein is a membrane glycoprotein localized at the cell plasma membrane. It has been shown to actively hydrolyze e…
ENSG00000129353	SLC44A2	chr19	normal_specific	NA	NA	0.101222	0.0484615	solute carrier family 44 member 2	NA
ENSG00000081237	PTPRC	chr1	normal_specific	NA	NA	-0.327638	0.0484811	protein tyrosine phosphatase receptor type C	The protein encoded by this gene is a member of the protein tyrosine phosphatase (PTP) family. PTPs are known to be signaling molecules that regulate a variety of cellular processes including cell growth, differentiation, mitosis, and oncogenic transformation. This PTP contains an extracellular domain, a single transmembrane segment and two tandem intracytoplasmic catalytic domains, and thus is c…
ENSG00000103512	NOMO1	chr16	normal_specific	NA	NA	0.0976301	0.0485696	NODAL modulator 1	This gene encodes a protein originally thought to be related to the collagenase gene family. This gene is one of three highly similar genes in a region of duplication located on the p arm of chromosome 16. These three genes encode closely related proteins that may have the same function. The protein encoded by one of these genes has been identified as part of a protein complex that participates i…
ENSG00000156599	ZDHHC5	chr11	normal_specific	NA	NA	0.0857294	0.0485696	zinc finger DHHC-type palmitoyltransferase 5	NA
ENSG00000138071	ACTR2	chr2	normal_specific	NA	NA	0.0926306	0.0487088	actin related protein 2	The specific function of this gene has not yet been determined; however, the protein it encodes is known to be a major constituent of the ARP2/3 complex. This complex is located at the cell surface and is essential to cell shape and motility through lamellipodial actin assembly and protrusion. Two transcript variants encoding different isoforms have been found for this gene. [provided by RefSeq, …
ENSG00000197562	RAB40C	chr16	normal_specific	NA	NA	-0.098764	0.0487898	RAB40C, member RAS oncogene family	NA
ENSG00000179361	ARID3B	chr15	normal_specific	NA	NA	-0.11413	0.0488299	AT-rich interaction domain 3B	This gene encodes a member of the ARID (AT-rich interaction domain) family of DNA-binding proteins. The encoded protein is homologous with two proteins that bind to the retinoblastoma gene product, and also with the mouse Bright and Drosophila dead ringer proteins. A pseudogene on chromosome 1p31 exists for this gene. Members of the ARID family have roles in embryonic patterning, cell lineage gen…
ENSG00000077420	APBB1IP	chr10	normal_specific	NA	NA	-0.304956	0.0488988	amyloid beta precursor protein binding family B member 1 interacting protein	NA
ENSG00000166181	API5	chr11	normal_specific	NA	NA	0.0658638	0.0488988	apoptosis inhibitor 5	This gene encodes an apoptosis inhibitory protein whose expression prevents apoptosis after growth factor deprivation. This protein suppresses the transcription factor E2F1-induced apoptosis and also interacts with, and negatively regulates Acinus, a nuclear factor involved in apoptotic DNA fragmentation. Its depletion enhances the cytotoxic action of the chemotherapeutic drugs. Multiple alternat…
ENSG00000079215	SLC1A3	chr5	normal_specific	NA	NA	-0.368953	0.049537	solute carrier family 1 member 3	This gene encodes a member of a member of a high affinity glutamate transporter family. This gene functions in the termination of excitatory neurotransmission in central nervous system. Mutations are associated with episodic ataxia, Type 6. Alternative splicing results in multiple transcript variants.[provided by RefSeq, Feb 2014].
ENSG00000178202	KDELC2	chr11	normal_specific	NA	NA	0.13512	0.0499635	protein O-glucosyltransferase 3	NA

## Sheet: Table 3
Number of X-chromosome genes (X-genes) escaping inactivation by SBG type in stomach and thyroid.
gene_set: background - number of X-genes tested for differential expression between genders; normal-specific/tumour-specific/common - number of X-genes among the normal-specific/tumour-specific/common SBGs
escaping: number of X-genes known to escape inactivation
remaining: number of X-genes that are not known to escape inactivation
p-value: Fisher's Exact Test P-value (alternative = "greater")
Stomach
gene_set	escaping	remaining	p-value
background	54	359
tumour-specific	5	2	0.00055
normal-specific	4	0	0.00026
common	22	0	4.36e-22
Thyroid
gene_set	escaping	remaining	p-value
background	53	353
tumour-specific	3	2	0.02
normal-specific	6	19	0.09
common	29	1	1.22e-28

## Sheet: Table4
Differentially expressed genes between tumour and matched-normal tissues (TCGA) in males and females stomach
ensembl_ID: ensembl gene ID
gene_symbol: gene symbol
chrom: chromosome number
state: tissue differential expression (TDE) state. common - TDE in males and females; males_specific - TDE only in males; females_specific - TDE only in females
log2FC_males: log2-fold change (log2FC) of expression between tumor and matched-normal tissue in males (edgeR reported). Genes with positive log2FC are over-expressed in tumour tissues while genes with negative log2FC are over-expressed in normal tissues
FDR_males: p-value adjusted for multiple-testing using Benjamin-Hochberg procedure. The p-value was derived from a likelihood-ratio test (LRT) for the tissue type coefficient (normal/tumor) of the linear model
log2FC_females: log2-fold change (log2FC) of expression between tumor and matched-normal tissue in females (edgeR reported). Genes with positive log2FC are over-expressed in tumour tissues while genes with negative log2FC are over-expressed in normal tissues
FDR_females: p-value adjusted for multiple-testing using Benjamin-Hochberg procedure. The p-value was derived from a likelihood-ratio test (LRT) for the tissue type coefficient (normal/tumor) of the linear model
name: gene name
summary: functional gene summary
ensembl_ID	gene_symbol	chrom	state	logFC_males	FDR_males	logFC_females	FDR_females	name	summary
ENSG00000143196	DPT	chr1	common	-5.36221	1.40681e-30	-4.44575	1.79512e-14	dermatopontin	Dermatopontin is an extracellular matrix protein with possible functions in cell-matrix interactions and matrix assembly. The protein is found in various tissues and many of its tyrosine residues are sulphated. Dermatopontin is postulated to modify the behavior of TGF-beta through interaction with decorin. [provided by RefSeq, Jul 2008].
ENSG00000165197	FIGF	chrX	common	-4.70415	1.40681e-30	-3.35427	1.15168e-05	vascular endothelial growth factor D	The protein encoded by this gene is a member of the platelet-derived growth factor/vascular endothelial growth factor (PDGF/VEGF) family and is active in angiogenesis, lymphangiogenesis, and endothelial cell growth. This secreted protein undergoes a complex proteolytic maturation, generating multiple processed forms which bind and activate VEGFR-2 and VEGFR-3 receptors. This protein is structural…
ENSG00000163815	CLEC3B	chr3	common	-3.88327	1.43974e-28	-3.03494	1.96675e-11	C-type lectin domain family 3 member B	NA
ENSG00000179051	RCC2	chr1	common	1.8863	2.5671e-25	1.44684	1.03531e-09	regulator of chromosome condensation 2	The protein encoded by this gene is a guanine exchange factor that is active on RalA, a small GTPase. The encoded protein and RalA are both essential for proper kinetochore-microtubule function in early mitosis. This protein has been shown to be a biomarker for colorectal cancer. [provided by RefSeq, Oct 2016].
ENSG00000120254	MTHFD1L	chr6	common	2.13938	5.85783e-24	1.92926	2.04581e-10	methylenetetrahydrofolate dehydrogenase (NADP+ dependent) 1 like	The protein encoded by this gene is involved in the synthesis of tetrahydrofolate (THF) in the mitochondrion. THF is important in the de novo synthesis of purines and thymidylate and in the regeneration of methionine from homocysteine. Several transcript variants encoding different isoforms have been found for this gene.[provided by RefSeq, Jun 2011].
ENSG00000213639	PPP1CB	chr2	male_specific	-1.23746	1.43544e-23	NA	NA	protein phosphatase 1 catalytic subunit beta	The protein encoded by this gene is one of the three catalytic subunits of protein phosphatase 1 (PP1). PP1 is a serine/threonine specific protein phosphatase known to be involved in the regulation of a variety of cellular processes, such as cell division, glycogen metabolism, muscle contractility, protein synthesis, and HIV-1 viral transcription. Mouse studies suggest that PP1 functions as a sup…
ENSG00000046653	GPM6B	chrX	common	-3.49108	2.95151e-23	-3.03724	3.23876e-14	glycoprotein M6B	This gene encodes a membrane glycoprotein that belongs to the proteolipid protein family. Proteolipid protein family members are expressed in most brain regions and are thought to be involved in cellular housekeeping functions such as membrane trafficking and cell-to-cell communication. This protein may also be involved in osteoblast differentiation. Alternate splicing results in multiple transcr…
ENSG00000092841	MYL6	chr12	common	-1.63002	4.68775e-23	-1.0814	8.63681e-06	myosin light chain 6	Myosin is a hexameric ATPase cellular motor protein. It is composed of two heavy chains, two nonphosphorylatable alkali light chains, and two phosphorylatable regulatory light chains. This gene encodes a myosin alkali light chain that is expressed in smooth muscle and non-muscle tissues. Genomic sequences representing several pseudogenes have been described and two transcript variants encoding di…
ENSG00000133800	LYVE1	chr11	common	-3.67431	1.39414e-22	-3.27006	9.82065e-11	lymphatic vessel endothelial hyaluronan receptor 1	This gene encodes a type I integral membrane glycoprotein. The encoded protein acts as a receptor and binds to both soluble and immobilized hyaluronan. This protein may function in lymphatic hyaluronan transport and have a role in tumor metastasis. [provided by RefSeq, Jul 2008].
ENSG00000138029	HADHB	chr2	male_specific	-1.08634	3.09439e-22	NA	NA	hydroxyacyl-CoA dehydrogenase trifunctional multienzyme complex subunit beta	This gene encodes the beta subunit of the mitochondrial trifunctional protein, which catalyzes the last three steps of mitochondrial beta-oxidation of long chain fatty acids. The mitochondrial membrane-bound heterocomplex is composed of four alpha and four beta subunits, with the beta subunit catalyzing the 3-ketoacyl-CoA thiolase activity. The encoded protein can also bind RNA and decreases the …
ENSG00000211445	GPX3	chr5	common	-3.12779	6.36685e-22	-2.64117	8.36744e-09	glutathione peroxidase 3	The protein encoded by this gene belongs to the glutathione peroxidase family, members of which catalyze the reduction of organic hydroperoxides and hydrogen peroxide (H2O2) by glutathione, and thereby protect cells against oxidative damage. Several isozymes of this gene family exist in vertebrates, which vary in cellular location and substrate specificity. This isozyme is secreted, and is abunda…
ENSG00000119801	YPEL5	chr2	male_specific	-1.25175	1.17713e-21	NA	NA	yippee like 5	NA
ENSG00000111602	TIMELESS	chr12	common	2.21444	1.50367e-21	1.74192	5.27747e-07	timeless circadian regulator	The protein encoded by this gene is highly conserved and is involved in cell survival after damage or stress, increase in DNA polymerase epsilon activity, maintenance of telomere length, and epithelial cell morphogenesis. The encoded protein also plays a role in the circadian rhythm autoregulatory loop, interacting with the PERIOD genes (PER1, PER2, and PER3) and others to downregulate activation…
ENSG00000266964	FXYD1	chr19	common	-3.65747	2.3561e-21	-3.09874	2.12901e-09	FXYD domain containing ion transport regulator 1	This gene encodes a member of a family of small membrane proteins that share a 35-amino acid signature sequence domain, beginning with the sequence PFXYD and containing 7 invariant and 6 highly conserved amino acids. The approved human gene nomenclature for the family is FXYD-domain containing ion transport regulator. Mouse FXYD5 has been termed RIC (Related to Ion Channel). FXYD2, also known as …
ENSG00000134201	GSTM5	chr1	common	-3.44843	3.19863e-21	-3.05301	5.27526e-10	glutathione S-transferase mu 5	Cytosolic and membrane-bound forms of glutathione S-transferase are encoded by two distinct supergene families. At present, eight distinct classes of the soluble cytoplasmic mammalian glutathione S-transferases have been identified: alpha, kappa, mu, omega, pi, sigma, theta and zeta. This gene encodes a glutathione S-transferase that belongs to the mu class. The mu class of enzymes functions in t…
ENSG00000131730	CKMT2	chr5	common	-3.76673	3.59857e-21	-3.30964	7.72233e-14	creatine kinase, mitochondrial 2	Mitochondrial creatine kinase (MtCK) is responsible for the transfer of high energy phosphate from mitochondria to the cytosolic carrier, creatine. It belongs to the creatine kinase isoenzyme family. It exists as two isoenzymes, sarcomeric MtCK and ubiquitous MtCK, encoded by separate genes. Mitochondrial creatine kinase occurs in two different oligomeric forms: dimers and octamers, in contrast t…
ENSG00000120729	MYOT	chr5	common	-3.57313	1.02842e-20	-3.20245	3.27096e-09	myotilin	This gene encodes a cystoskeletal protein which plays a significant role in the stability of thin filaments during muscle contraction. This protein binds F-actin, crosslinks actin filaments, and prevents latrunculin A-induced filament disassembly. Mutations in this gene have been associated with limb-girdle muscular dystrophy and myofibrillar myopathies. Several alternatively spliced transcript v…
ENSG00000123091	RNF11	chr1	male_specific	-1.17585	1.95991e-20	NA	NA	ring finger protein 11	The protein encoded by this gene contains a RING-H2 finger motif, which is known to be important for protein-protein interactions. The expression of this gene has been shown to be induced by mutant RET proteins (MEN2A/MEN2B). The germline mutations in RET gene are known to be responsible for the development of multiple endocrine neoplasia (MEN). [provided by RefSeq, Jul 2008].
ENSG00000165072	MAMDC2	chr9	common	-4.79557	2.1206e-20	-3.87553	1.46802e-08	MAM domain containing 2	NA
ENSG00000147576	ADHFE1	chr8	common	-3.39432	2.29334e-20	-3.11808	4.87552e-11	alcohol dehydrogenase iron containing 1	The ADHFE1 gene encodes hydroxyacid-oxoacid transhydrogenase (EC 1.1.99.24), which is responsible for the oxidation of 4-hydroxybutyrate in mammalian tissues (Kardon et al., 2006 [PubMed 16616524]).[supplied by OMIM, Mar 2008].
ENSG00000198668	CALM1	chr14	male_specific	-1.1662	3.74663e-20	NA	NA	calmodulin 1	This gene encodes a member of the EF-hand calcium-binding protein family. It is one of three genes which encode an identical calcium binding protein which is one of the four subunits of phosphorylase kinase. Two pseudogenes have been identified on chromosome 7 and X. Multiple transcript variants encoding different isoforms have been found for this gene.[provided by RefSeq, Oct 2009].
ENSG00000108924	HLF	chr17	common	-3.92669	4.64642e-20	-3.46567	3.23849e-12	HLF transcription factor, PAR bZIP family member	This gene encodes a member of the proline and acidic-rich (PAR) protein family, a subset of the bZIP transcription factors. The encoded protein forms homodimers or heterodimers with other PAR family members and binds sequence-specific promoter elements to activate transcription. Chromosomal translocations fusing portions of this gene with the E2A gene cause a subset of childhood B-lineage acute l…
ENSG00000140525	FANCI	chr15	common	2.32478	4.77025e-20	2.1843	1.17952e-08	FA complementation group I	The Fanconi anemia complementation group (FANC) currently includes FANCA, FANCB, FANCC, FANCD1 (also called BRCA2), FANCD2, FANCE, FANCF, FANCG, FANCI, FANCJ (also called BRIP1), FANCL, FANCM and FANCN (also called PALB2). The previously defined group FANCH is the same as FANCA. Fanconi anemia is a genetically heterogeneous recessive disorder characterized by cytogenetic instability, hypersensiti…
ENSG00000164096	C4orf3	chr4	common	-1.46725	6.26485e-20	-1.03479	3.47416e-07	chromosome 4 open reading frame 3	NA
ENSG00000101412	E2F1	chr20	common	2.50598	6.70485e-20	2.63449	1.63565e-10	E2F transcription factor 1	The protein encoded by this gene is a member of the E2F family of transcription factors. The E2F family plays a crucial role in the control of cell cycle and action of tumor suppressor proteins and is also a target of the transforming proteins of small DNA tumor viruses. The E2F proteins contain several evolutionally conserved domains found in most members of the family. These domains include a D…
ENSG00000114166	KAT2B	chr3	common	-1.94923	8.78992e-20	-1.7196	8.68523e-09	lysine acetyltransferase 2B	CBP and p300 are large nuclear proteins that bind to many sequence-specific factors involved in cell growth and/or differentiation, including c-jun and the adenoviral oncoprotein E1A. The protein encoded by this gene associates with p300/CBP. It has in vitro and in vivo binding activity with CBP and p300, and competes with E1A for binding sites in p300/CBP. It has histone acetyl transferase activ…
ENSG00000142945	KIF2C	chr1	common	2.56358	1.12397e-19	2.45568	2.06532e-08	kinesin family member 2C	This gene encodes a kinesin-like protein that functions as a microtubule-dependent molecular motor. The encoded protein can depolymerize microtubules at the plus end, thereby promoting mitotic chromosome segregation. Alternative splicing results in multiple transcript variants. [provided by RefSeq, Jul 2014].
ENSG00000172005	MAL	chr2	common	-8.29163	1.2429e-19	-4.78216	2.18757e-09	mal, T cell differentiation protein	The protein encoded by this gene is a highly hydrophobic integral membrane protein belonging to the MAL family of proteolipids. The protein has been localized to the endoplasmic reticulum of T-cells and is a candidate linker protein in T-cell signal transduction. In addition, this proteolipid is localized in compact myelin of cells in the nervous system and has been implicated in myelin biogenesi…
ENSG00000123560	PLP1	chrX	common	-5.76047	1.36282e-19	-5.36826	3.30979e-12	proteolipid protein 1	This gene encodes a transmembrane proteolipid protein that is the predominant component of myelin. The encoded protein may play a role in the compaction, stabilization, and maintenance of myelin sheaths, as well as in oligodendrocyte development and axonal survival. Mutations in this gene cause Pelizaeus-Merzbacher disease and spastic paraplegia type 2. Alternatively splicing results in multiple …
ENSG00000167779	IGFBP6	chr12	common	-2.88254	5.39019e-19	-2.40681	9.06955e-08	insulin like growth factor binding protein 6	NA
ENSG00000123473	STIL	chr1	common	2.57321	7.06163e-19	2.64276	5.27526e-10	STIL centriolar assembly protein	This gene encodes a cytoplasmic protein implicated in regulation of the mitotic spindle checkpoint, a regulatory pathway that monitors chromosome segregation during cell division to ensure the proper distribution of chromosomes to daughter cells. The protein is phosphorylated in mitosis and in response to activation of the spindle checkpoint, and disappears when cells transition to G1 phase. It i…
ENSG00000148180	GSN	chr9	common	-2.16086	7.06163e-19	-2.19631	1.1363e-11	gelsolin	The protein encoded by this gene binds to the 'plus' ends of actin monomers and filaments to prevent monomer exchange. The encoded calcium-regulated protein functions in both assembly and disassembly of actin filaments. Defects in this gene are a cause of familial amyloidosis Finnish type (FAF). Multiple transcript variants encoding several different isoforms have been found for this gene. [provi…
ENSG00000160957	RECQL4	chr8	common	2.80586	9.10132e-19	2.64646	1.05587e-08	RecQ like helicase 4	The protein encoded by this gene is a DNA helicase that belongs to the RecQ helicase family. DNA helicases unwind double-stranded DNA into single-stranded DNAs and may modulate chromosome segregation. This gene is predominantly expressed in thymus and testis. Mutations in this gene are associated with Rothmund-Thomson, RAPADILINO and Baller-Gerold syndromes. [provided by RefSeq, Jan 2010].
ENSG00000159228	CBR1	chr21	common	-2.23311	9.72453e-19	-1.32322	6.32332e-05	carbonyl reductase 1	The protein encoded by this gene belongs to the short-chain dehydrogenases/reductases (SDR) family, which function as NADPH-dependent oxidoreductases having wide specificity for carbonyl compounds, such as quinones, prostaglandins, and various xenobiotics. Alternatively spliced transcript variants have been found for this gene. [provided by RefSeq, Nov 2013].
ENSG00000112964	GHR	chr5	common	-3.1201	1.31757e-18	-2.98164	8.62886e-09	growth hormone receptor	This gene encodes a member of the type I cytokine receptor family, which is a transmembrane receptor for growth hormone. Binding of growth hormone to the receptor leads to receptor dimerization and the activation of an intra- and intercellular signal transduction pathway leading to growth. Mutations in this gene have been associated with Laron syndrome, also known as the growth hormone insensitiv…
ENSG00000176533	GNG7	chr19	common	-2.79715	1.31757e-18	-2.58802	1.45368e-07	G protein subunit gamma 7	NA
ENSG00000198901	PRC1	chr15	common	2.29395	1.9207e-18	2.13676	7.92916e-08	protein regulator of cytokinesis 1	This gene encodes a protein that is involved in cytokinesis. The protein is present at high levels during the S and G2/M phases of mitosis but its levels drop dramatically when the cell exits mitosis and enters the G1 phase. It is located in the nucleus during interphase, becomes associated with mitotic spindles in a highly dynamic manner during mitosis, and localizes to the cell mid-body during …
ENSG00000068976	PYGM	chr11	common	-3.82795	2.04253e-18	-3.69558	1.1363e-11	glycogen phosphorylase, muscle associated	This gene encodes a muscle enzyme involved in glycogenolysis. Highly similar enzymes encoded by different genes are found in liver and brain. Mutations in this gene are associated with McArdle disease (myophosphorylase deficiency), a glycogen storage disease of muscle. Alternative splicing results in multiple transcript variants.[provided by RefSeq, Sep 2009].
ENSG00000156802	ATAD2	chr8	common	2.2846	2.35006e-18	2.03246	9.72689e-09	ATPase family AAA domain containing 2	A large family of ATPases has been described, whose key feature is that they share a conserved region of about 220 amino acids that contains an ATP-binding site. The proteins that belong to this family either contain one or two AAA (ATPases Associated with diverse cellular Activities) domains. AAA family proteins often perform chaperone-like functions that assist in the assembly, operation, or di…
ENSG00000050344	NFE2L3	chr7	common	2.55024	2.49593e-18	2.48483	4.22513e-08	nuclear factor, erythroid 2 like 3	This gene encodes a member of the cap 'n' collar basic-region leucine zipper family of transcription factors. The encoded protein heterodimerizes with small musculoaponeurotic fibrosarcoma factors to bind antioxidant response elements in target genes. This protein is a membrane bound glycoprotein that is targeted to the endoplasmic reticulum and the nuclear envelope. Pseudogenes of this gene are …
ENSG00000146670	CDCA5	chr11	common	2.60215	3.21048e-18	2.92527	3.80552e-10	cell division cycle associated 5	NA
ENSG00000100650	SRSF5	chr14	male_specific	-1.00296	3.67105e-18	NA	NA	serine and arginine rich splicing factor 5	The protein encoded by this gene is a member of the serine/arginine (SR)-rich family of pre-mRNA splicing factors, which constitute part of the spliceosome. Each of these factors contains an RNA recognition motif (RRM) for binding RNA and an RS domain for binding other proteins. The RS domain is rich in serine and arginine residues and facilitates interaction between different SR splicing factors…
ENSG00000144655	CSRNP1	chr3	common	-2.08957	3.67105e-18	-1.87796	1.22656e-08	cysteine and serine rich nuclear protein 1	This gene encodes a protein that localizes to the nucleus and expression of this gene is induced in response to elevated levels of axin. The Wnt signalling pathway, which is negatively regulated by axin, is important in axis formation in early development and impaired regulation of this signalling pathway is often involved in tumors. A decreased level of expression of this gene in tumors compared…
ENSG00000137807	KIF23	chr15	common	2.55248	3.86898e-18	2.58362	1.63565e-10	kinesin family member 23	The protein encoded by this gene is a member of kinesin-like protein family. This family includes microtubule-dependent molecular motors that transport organelles within cells and move chromosomes during cell division. This protein has been shown to cross-bridge antiparallel microtubules and drive microtubule movement in vitro. Alternate splicing of this gene results in multiple transcript varian…
ENSG00000099860	GADD45B	chr19	common	-2.61773	4.19574e-18	-2.27371	3.5626e-10	growth arrest and DNA damage inducible beta	This gene is a member of a group of genes whose transcript levels are increased following stressful growth arrest conditions and treatment with DNA-damaging agents. The genes in this group respond to environmental stresses by mediating activation of the p38/JNK pathway. This activation is mediated via their proteins binding and activating MTK1/MEKK4 kinase, which is an upstream activator of both …
ENSG00000198483	ANKRD35	chr1	common	-3.38585	4.33066e-18	-2.41268	5.35653e-09	ankyrin repeat domain 35	NA
ENSG00000198826	ARHGAP11A	chr15	common	2.30636	4.96824e-18	2.10409	4.21747e-07	Rho GTPase activating protein 11A	This gene encodes a member of the Rho GTPase activating protein family. In response to DNA damage, the encoded protein interacts with the p53 tumor suppressor protein and stimulates its tetramerization, which results in cell-cycle arrest and apoptosis. A chromosomal deletion that includes this gene is one cause of Prader-Willi syndrome, and an intronic variant of this gene may be associated with …
ENSG00000116473	RAP1A	chr1	male_specific	-1.40107	5.16001e-18	NA	NA	RAP1A, member of RAS oncogene family	This gene encodes a member of the Ras family of small GTPases. The encoded protein undergoes a change in conformational state and activity, depending on whether it is bound to GTP or GDP. This protein is activated by several types of guanine nucleotide exchange factors (GEFs), and inactivated by two groups of GTPase-activating proteins (GAPs). The activation status of the encoded protein is there…
ENSG00000127191	TRAF2	chr9	common	1.3358	7.42623e-18	1.24758	4.21122e-08	TNF receptor associated factor 2	The protein encoded by this gene is a member of the TNF receptor associated factor (TRAF) protein family. TRAF proteins associate with, and mediate the signal transduction from members of the TNF receptor superfamily. This protein directly interacts with TNF receptors, and forms a heterodimeric complex with TRAF1. This protein is required for TNF-alpha-mediated activation of MAPK8/JNK and NF-kapp…
ENSG00000160949	TONSL	chr8	common	2.17842	7.8739e-18	1.60782	1.0192e-05	tonsoku like, DNA repair protein	The protein encoded by this gene is thought to be a negative regulator of NF-kappa-B mediated transcription. The encoded protein may bind NF-kappa-B complexes and trap them in the cytoplasm, preventing them from entering the nucleus and interacting with the DNA. Phosphorylation of this protein targets it for degradation by the ubiquitination pathway, which frees the NF-kappa-B complexes to enter …
ENSG00000197905	TEAD4	chr12	common	1.78346	8.30789e-18	1.67164	3.6152e-06	TEA domain transcription factor 4	This gene product is a member of the transcriptional enhancer factor (TEF) family of transcription factors, which contain the TEA/ATTS DNA-binding domain. It is preferentially expressed in the skeletal muscle, and binds to the M-CAT regulatory element found in promoters of muscle-specific genes to direct their gene expression. Alternatively spliced transcripts encoding distinct isoforms, some of …
ENSG00000160307	S100B	chr21	common	-3.19263	1.02568e-17	-2.44357	6.02781e-08	S100 calcium binding protein B	The protein encoded by this gene is a member of the S100 family of proteins containing 2 EF-hand calcium-binding motifs. S100 proteins are localized in the cytoplasm and/or nucleus of a wide range of cells, and involved in the regulation of a number of cellular processes such as cell cycle progression and differentiation. S100 genes include at least 13 members which are located as a cluster on ch…
ENSG00000117724	CENPF	chr1	common	2.80373	1.28935e-17	2.64284	1.0635e-08	centromere protein F	This gene encodes a protein that associates with the centromere-kinetochore complex. The protein is a component of the nuclear matrix during the G2 phase of interphase. In late G2 the protein associates with the kinetochore and maintains this association through early anaphase. It localizes to the spindle midzone and the intracellular bridge in late anaphase and telophase, respectively, and is th…
ENSG00000136295	TTYH3	chr7	common	2.40362	1.87082e-17	2.06581	7.13795e-09	tweety family member 3	This gene encodes a member of the tweety family of proteins. Members of this family function as chloride anion channels. The encoded protein functions as a calcium(2+)-activated large conductance chloride(-) channel. [provided by RefSeq, Jul 2008].
ENSG00000073111	MCM2	chr3	common	2.16871	2.78527e-17	1.79179	5.81397e-07	minichromosome maintenance complex component 2	The protein encoded by this gene is one of the highly conserved mini-chromosome maintenance proteins (MCM) that are involved in the initiation of eukaryotic genome replication. The hexameric protein complex formed by MCM proteins is a key component of the pre-replication complex (pre_RC) and may be involved in the formation of replication forks and in the recruitment of other DNA replication rela…
ENSG00000011426	ANLN	chr7	common	2.38676	3.71606e-17	2.43174	7.13795e-09	anillin actin binding protein	This gene encodes an actin-binding protein that plays a role in cell growth and migration, and in cytokinesis. The encoded protein is thought to regulate actin cytoskeletal dynamics in podocytes, components of the glomerulus. Mutations in this gene are associated with focal segmental glomerulosclerosis 8. Alternative splicing results in multiple transcript variants encoding different isoforms. [p…
ENSG00000183856	IQGAP3	chr1	common	2.6638	3.9134e-17	2.59641	2.84639e-08	IQ motif containing GTPase activating protein 3	NA
ENSG00000102349	KLF8	chrX	common	-2.872	6.58262e-17	-2.01237	2.25102e-05	Kruppel like factor 8	This gene encodes a protein which is a member of the Sp/KLF family of transcription factors. Members of this family contain a C-terminal DNA-binding domain with three Kruppel-like zinc fingers. The encoded protein is thought to play an important role in the regulation of epithelial to mesenchymal transition, a process which occurs normally during development but also during metastasis. A pseudoge…
ENSG00000130309	COLGALT1	chr19	male_specific	1.19546	6.58262e-17	NA	NA	collagen beta(1-O)galactosyltransferase 1	The protein encoded by this gene is one of two enzymes that transfers galactose moieties to hydroxylysine residues of collagen and mannose binding lectin. This gene is constitutively expressed and encodes a soluble protein that localizes to the endoplasmic reticulum. [provided by RefSeq, Dec 2015].
ENSG00000119938	PPP1R3C	chr10	common	-3.92827	6.82801e-17	-2.74616	1.04185e-07	protein phosphatase 1 regulatory subunit 3C	This gene encodes a carbohydrate binding protein that is a subunit of the protein phosphatase 1 (PP1) complex. PP1 catalyzes reversible protein phosphorylation, which is important in a wide range of cellular activities. The encoded protein affects glycogen biosynthesis by activating glycogen synthase and limiting glycogen breakdown by reducing glycogen phosphorylase activity. DNA hypermethylation…
ENSG00000138346	DNA2	chr10	common	2.36057	7.46854e-17	1.85929	7.30914e-07	DNA replication helicase/nuclease 2	This gene encodes a member of the DNA2/NAM7 helicase family. The encoded protein is a conserved helicase/nuclease involved in the maintenance of mitochondrial and nuclear DNA stability. Mutations in this gene are associated with autosomal dominant progressive external ophthalmoplegia-6 (PEOA6) and Seckel syndrome 8. Alternatively spliced transcript variants have been found for this gene. [provide…
ENSG00000161281	COX7A1	chr19	common	-2.36022	7.54949e-17	-1.63857	2.7737e-05	cytochrome c oxidase subunit 7A1	Cytochrome c oxidase (COX), the terminal component of the mitochondrial respiratory chain, catalyzes the electron transfer from reduced cytochrome c to oxygen. This component is a heteromeric complex consisting of 3 catalytic subunits encoded by mitochondrial genes and multiple structural subunits encoded by nuclear genes. The mitochondrially-encoded subunits function in electron transfer, and th…
ENSG00000133119	RFC3	chr13	common	2.0142	7.73587e-17	1.97794	8.05645e-08	replication factor C subunit 3	The elongation of primed DNA templates by DNA polymerase delta and DNA polymerase epsilon requires the accessory proteins proliferating cell nuclear antigen (PCNA) and replication factor C (RFC). RFC, also named activator 1, is a protein complex consisting of five distinct subunits of 140, 40, 38, 37, and 36 kDa. This gene encodes the 38 kDa subunit. This subunit is essential for the interaction …
ENSG00000058804	NDC1	chr1	common	1.60394	8.17459e-17	1.39367	6.03272e-06	NDC1 transmembrane nucleoporin	NA
ENSG00000075702	WDR62	chr19	common	2.62043	1.0255e-16	2.43183	2.31608e-08	WD repeat domain 62	This gene is proposed to play a role in cerebral cortical development. Mutations in this gene have been associated with microencephaly, cortical malformations, and cognitive disability. Alternative splicing results in multiple transcript variants. [provided by RefSeq, Jan 2011].
ENSG00000153902	LGI4	chr19	common	-2.73723	1.12393e-16	-2.4542	5.35653e-09	leucine rich repeat LGI family member 4	NA
ENSG00000100307	CBX7	chr22	common	-2.09168	1.1618e-16	-1.8889	3.95603e-09	chromobox 7	This gene encodes a protein that contains the CHROMO (CHRomatin Organization MOdifier) domain. The encoded protein is a component of the Polycomb repressive complex 1 (PRC1), and is thought to control the lifespan of several normal human cells. [provided by RefSeq, Oct 2016].
ENSG00000170323	FABP4	chr8	common	-4.27363	1.36004e-16	-2.9384	0.000433499	fatty acid binding protein 4	FABP4 encodes the fatty acid binding protein found in adipocytes. Fatty acid binding proteins are a family of small, highly conserved, cytoplasmic proteins that bind long-chain fatty acids and other hydrophobic ligands. It is thought that FABPs roles include fatty acid uptake, transport, and metabolism. [provided by RefSeq, Jul 2008].
ENSG00000064205	WISP2	chr20	common	-3.99277	1.38085e-16	-3.92164	4.21997e-11	cellular communication network factor 5	This gene encodes a member of the WNT1 inducible signaling pathway (WISP) protein subfamily, which belongs to the connective tissue growth factor (CTGF) family. WNT1 is a member of a family of cysteine-rich, glycosylated signaling proteins that mediate diverse developmental processes. The CTGF family members are characterized by four conserved cysteine-rich domains: insulin-like growth factor-bin…
ENSG00000179915	NRXN1	chr2	common	-4.90467	1.3931e-16	-4.26662	2.46505e-09	neurexin 1	This gene encodes a single-pass type I membrane protein that belongs to the neurexin family. Neurexins are cell-surface receptors that bind neuroligins to form Ca(2+)-dependent neurexin/neuroligin complexes at synapses in the central nervous system. This complex is required for efficient neurotransmission and is involved in the formation of synaptic contacts. Three members of this gene family hav…
ENSG00000114346	ECT2	chr3	common	2.39083	1.50969e-16	2.67609	1.15004e-10	epithelial cell transforming 2	The protein encoded by this gene is a guanine nucleotide exchange factor and transforming protein that is related to Rho-specific exchange factors and yeast cell cycle regulators. The expression of this gene is elevated with the onset of DNA synthesis and remains elevated during G2 and M phases. In situ hybridization analysis showed that expression is at a high level in cells undergoing mitosis i…
ENSG00000151729	SLC25A4	chr4	common	-2.12684	1.68837e-16	-1.76373	1.52053e-07	solute carrier family 25 member 4	This gene is a member of the mitochondrial carrier subfamily of solute carrier protein genes. The product of this gene functions as a gated pore that translocates ADP from the cytoplasm into the mitochondrial matrix and ATP from the mitochondrial matrix into the cytoplasm. The protein forms a homodimer embedded in the inner mitochondria membrane. Mutations in this gene have been shown to result i…
ENSG00000104738	MCM4	chr8	common	2.09006	1.69641e-16	1.66396	1.3143e-05	minichromosome maintenance complex component 4	The protein encoded by this gene is one of the highly conserved mini-chromosome maintenance proteins (MCM) that are essential for the initiation of eukaryotic genome replication. The hexameric protein complex formed by MCM proteins is a key component of the pre-replication complex (pre_RC) and may be involved in the formation of replication forks and in the recruitment of other DNA replication re…
ENSG00000119138	KLF9	chr9	common	-2.32651	1.72228e-16	-2.14147	1.48008e-09	Kruppel like factor 9	The protein encoded by this gene is a transcription factor that binds to GC box elements located in the promoter. Binding of the encoded protein to a single GC box inhibits mRNA expression while binding to tandemly repeated GC box elements activates transcription. [provided by RefSeq, Jul 2008].
ENSG00000135218	CD36	chr7	common	-2.84837	1.72331e-16	-2.13321	7.42318e-05	CD36 molecule	The protein encoded by this gene is the fourth major glycoprotein of the platelet surface and serves as a receptor for thrombospondin in platelets and various cell lines. Since thrombospondins are widely distributed proteins involved in a variety of adhesive processes, this protein may have important functions as a cell adhesion molecule. It binds to collagen, thrombospondin, anionic phospholipid…
ENSG00000127564	PKMYT1	chr16	common	2.72458	1.72831e-16	2.733	1.08057e-08	protein kinase, membrane associated tyrosine/threonine 1	This gene encodes a member of the serine/threonine protein kinase family. The encoded protein is a membrane-associated kinase that negatively regulates the G2/M transition of the cell cycle by phosphorylating and inactivating cyclin-dependent kinase 1. The activity of the encoded protein is regulated by polo-like kinase 1. Alternatively spliced transcript variants encoding multiple isoforms have …
ENSG00000135763	URB2	chr1	common	1.50168	1.77006e-16	1.02491	0.000746494	URB2 ribosome biogenesis homolog	NA
ENSG00000186185	KIF18B	chr17	common	2.77574	1.77546e-16	2.69246	1.73357e-08	kinesin family member 18B	NA
ENSG00000128973	CLN6	chr15	common	1.49651	1.86282e-16	1.35279	1.58113e-07	CLN6 transmembrane ER protein	This gene is one of eight which have been associated with neuronal ceroid lipofuscinoses (NCL). Also referred to as Batten disease, NCL comprises a class of autosomal recessive, neurodegenerative disorders affecting children. The genes responsible likely encode proteins involved in the degradation of post-translationally modified proteins in lysosomes. The primary defect in NCL disorders is thoug…
ENSG00000068650	ATP11A	chr13	common	2.20481	2.16702e-16	2.07998	6.56533e-08	ATPase phospholipid transporting 11A	The protein encoded by this gene is an integral membrane ATPase. The encoded protein is probably phosphorylated in its intermediate state and likely drives the transport of ions such as calcium across membranes. Two transcript variants encoding different isoforms have been found for this gene. [provided by RefSeq, Jul 2008].
ENSG00000187741	FANCA	chr16	common	2.26313	2.34249e-16	1.83305	8.92913e-06	FA complementation group A	The Fanconi anemia complementation group (FANC) currently includes FANCA, FANCB, FANCC, FANCD1 (also called BRCA2), FANCD2, FANCE, FANCF, FANCG, FANCI, FANCJ (also called BRIP1), FANCL, FANCM and FANCN (also called PALB2). The previously defined group FANCH is the same as FANCA. Fanconi anemia is a genetically heterogeneous recessive disorder characterized by cytogenetic instability, hypersensiti…
ENSG00000144554	FANCD2	chr3	common	1.97515	2.45314e-16	1.77707	1.5515e-06	FA complementation group D2	The Fanconi anemia complementation group (FANC) currently includes FANCA, FANCB, FANCC, FANCD1 (also called BRCA2), FANCD2, FANCE, FANCF, FANCG, FANCI, FANCJ (also called BRIP1), FANCL, FANCM and FANCN (also called PALB2). The previously defined group FANCH is the same as FANCA. Fanconi anemia is a genetically heterogeneous recessive disorder characterized by cytogenetic instability, hypersensiti…
ENSG00000124942	AHNAK	chr11	common	-2.01308	2.57902e-16	-1.77965	4.96584e-08	AHNAK nucleoprotein	The protein encoded by this gene is a large (700 kDa) structural scaffold protein consisting of a central domain with 128 aa repeats. The encoded protein may play a role in such diverse processes as blood-brain barrier formation, cell structure and migration, cardiac calcium channel regulation, and tumor metastasis. A much shorter variant encoding a 17 kDa isoform exists for this gene, and the sh…
ENSG00000090889	KIF4A	chrX	common	2.52838	2.68819e-16	2.65753	1.20313e-08	kinesin family member 4A	This gene encodes a member of the kinesin 4 subfamily of kinesin related proteins. The encoded protein is an ATP dependent microtubule-based motor protein that is involved in the intracellular transport of membranous organelles. This protein also associates with condensed chromosome arms and may be involved in maintaining chromosome integrity during mitosis. This protein may also be involved in t…
ENSG00000130816	DNMT1	chr19	common	1.53459	2.70151e-16	1.09537	4.20948e-05	DNA methyltransferase 1	This gene encodes an enzyme that transfers methyl groups to cytosine nucleotides of genomic DNA. This protein is the major enzyme responsible for maintaining methylation patterns following DNA replication and shows a preference for hemi-methylated DNA. Methylation of DNA is an important component of mammalian epigenetic gene regulation. Aberrant methylation patterns are found in human tumors and …
ENSG00000166292	TMEM100	chr17	common	-3.94013	2.82616e-16	-3.54222	1.37527e-07	transmembrane protein 100	NA
ENSG00000176208	ATAD5	chr17	common	1.58342	3.12169e-16	1.4001	3.21166e-07	ATPase family AAA domain containing 5	NA
ENSG00000168079	SCARA5	chr8	common	-4.17687	3.32632e-16	-3.37088	1.82354e-06	scavenger receptor class A member 5	NA
ENSG00000022267	FHL1	chrX	common	-3.75692	3.55699e-16	-3.34647	4.60443e-09	four and a half LIM domains 1	This gene encodes a member of the four-and-a-half-LIM-only protein family. Family members contain two highly conserved, tandemly arranged, zinc finger domains with four highly conserved cysteines binding a zinc atom in each zinc finger. Expression of these family members occurs in a cell- and tissue-specific mode and these proteins are involved in many cellular processes. Mutations in this gene h…
ENSG00000128059	PPAT	chr4	common	1.64471	3.80331e-16	1.29728	7.80834e-05	phosphoribosyl pyrophosphate amidotransferase	The protein encoded by this gene is a member of the purine/pyrimidine phosphoribosyltransferase family. It is a regulatory allosteric enzyme that catalyzes the first step of de novo purine nucleotide biosythetic pathway. This gene and PAICS/AIRC gene, a bifunctional enzyme catalyzing steps six and seven of this pathway, are located in close proximity on chromosome 4, and divergently transcribed f…
ENSG00000169252	ADRB2	chr5	common	-3.15859	3.92437e-16	-2.33142	7.0624e-06	adrenoceptor beta 2	This gene encodes beta-2-adrenergic receptor which is a member of the G protein-coupled receptor superfamily. This receptor is directly associated with one of its ultimate effectors, the class C L-type calcium channel Ca(V)1.2. This receptor-channel complex also contains a G protein, an adenylyl cyclase, cAMP-dependent kinase, and the counterbalancing phosphatase, PP2A. The assembly of the signal…
ENSG00000108381	ASPA	chr17	common	-3.04565	4.04044e-16	-2.50476	8.4814e-06	aspartoacylase	This gene encodes an enzyme that catalyzes the conversion of N-acetyl_L-aspartic acid (NAA) to aspartate and acetate. NAA is abundant in the brain where hydrolysis by aspartoacylase is thought to help maintain white matter. This protein is an NAA scavenger in other tissues. Mutations in this gene cause Canavan disease. Alternatively spliced transcript variants have been found for this gene. [prov…
ENSG00000185803	SLC52A2	chr8	common	1.69256	4.08952e-16	1.7072	1.71683e-07	solute carrier family 52 member 2	This gene encodes a membrane protein which belongs to the riboflavin transporter family. In humans, riboflavin must be obtained by intestinal absorption because it cannot be synthesized by the body. The water-soluble vitamin riboflavin is processed to the coenzymes flavin mononucleotide (FMN) and flavin adenine dinucleotide (FAD) which then act as intermediaries in many cellular metabolic reactio…
ENSG00000186193	SAPCD2	chr9	common	2.9434	4.38378e-16	2.71045	8.57016e-07	suppressor APC domain containing 2	NA
ENSG00000197766	CFD	chr19	common	-3.195	4.42824e-16	-3.67997	1.05451e-13	complement factor D	This gene encodes a member of the S1, or chymotrypsin, family of serine peptidases. This protease catalyzes the cleavage of factor B, the rate-limiting step of the alternative pathway of complement activation. This protein also functions as an adipokine, a cell signaling protein secreted by adipocytes, which regulates insulin secretion in mice. Mutations in this gene underlie complement factor D …
ENSG00000198624	CCDC69	chr5	common	-2.68708	4.58338e-16	-2.31218	2.74991e-07	coiled-coil domain containing 69	NA
ENSG00000134531	EMP1	chr12	common	-3.4132	4.70704e-16	-1.73314	0.000579841	epithelial membrane protein 1	NA
ENSG00000084774	CAD	chr2	male_specific	1.52164	4.8082e-16	NA	NA	carbamoyl-phosphate synthetase 2, aspartate transcarbamylase, and dihydroorotase	The de novo synthesis of pyrimidine nucleotides is required for mammalian cells to proliferate. This gene encodes a trifunctional protein which is associated with the enzymatic activities of the first 3 enzymes in the 6-step pathway of pyrimidine biosynthesis: carbamoylphosphate synthetase (CPS II), aspartate transcarbamoylase, and dihydroorotase. This protein is regulated by the mitogen-activate…
ENSG00000139433	GLTP	chr12	common	-1.87635	4.8082e-16	-1.00756	0.000116462	glycolipid transfer protein	The protein encoded by this gene is similar to bovine and porcine proteins which accelerate transfer of certain glycosphingolipids and glyceroglycolipids between membranes. It is thought to be a cytoplasmic protein. [provided by RefSeq, Jul 2008].
ENSG00000150990	DHX37	chr12	male_specific	1.22291	4.8082e-16	NA	NA	DEAH-box helicase 37	This gene encodes a DEAD box protein. DEAD box proteins, characterized by the conserved motif Asp-Glu-Ala-Asp (DEAD), are putative RNA helicases. They are implicated in a number of cellular processes involving alteration of RNA secondary structure such as translation initiation, nuclear and mitochondrial splicing, and ribosome and spliceosome assembly. Based on their distribution patterns, some m…
ENSG00000176619	LMNB2	chr19	common	1.63113	4.8082e-16	1.46055	6.08024e-07	lamin B2	This gene encodes a B type nuclear lamin. The nuclear lamina consists of a two-dimensional matrix of proteins located next to the inner nuclear membrane. The lamin family of proteins make up the matrix and are highly conserved in evolution. During mitosis, the lamina matrix is reversibly disassembled as the lamin proteins are phosphorylated. Lamin proteins are thought to be involved in nuclear st…
ENSG00000187091	PLCD1	chr3	common	-1.81027	5.79645e-16	-1.06483	0.00100934	phospholipase C delta 1	This gene encodes a member of the phospholipase C family. Phospholipase C isozymes play critical roles in intracellular signal transduction by catalyzing the hydrolysis of phosphatidylinositol 4,5-bisphosphate (PIP2) into the second messengers diacylglycerol (DAG) and inositol triphosphate (IP3). The encoded protein functions as a tumor suppressor in several types of cancer, and mutations in this…
ENSG00000140416	TPM1	chr15	common	-2.55787	6.06e-16	-2.22323	3.23701e-09	tropomyosin 1	This gene is a member of the tropomyosin family of highly conserved, widely distributed actin-binding proteins involved in the contractile system of striated and smooth muscles and the cytoskeleton of non-muscle cells. Tropomyosin is composed of two alpha-helical chains arranged as a coiled-coil. It is polymerized end to end along the two grooves of actin filaments and provides stability to the f…
ENSG00000118564	FBXL5	chr4	male_specific	-1.04921	6.48871e-16	NA	NA	F-box and leucine rich repeat protein 5	This gene encodes a member of the F-box protein family which is characterized by an approximately 40 amino acid motif, the F-box. The F-box proteins constitute one of the four subunits of ubiquitin protein ligase complex called SCFs (SKP1-cullin-F-box), which function in phosphorylation-dependent ubiquitination. The F-box proteins are divided into 3 classes: Fbws containing WD-40 domains, Fbls co…
ENSG00000168411	RFWD3	chr16	common	1.37425	6.77597e-16	1.04283	5.84354e-05	ring finger and WD repeat domain 3	NA
ENSG00000213366	GSTM2	chr1	common	-2.32834	6.80108e-16	-1.4533	0.000460918	glutathione S-transferase mu 2	Cytosolic and membrane-bound forms of glutathione S-transferase are encoded by two distinct supergene families. At present, eight distinct classes of the soluble cytoplasmic mammalian glutathione S-transferases have been identified: alpha, kappa, mu, omega, pi, sigma, theta and zeta. This gene encodes a glutathione S-transferase that belongs to the mu class. The mu class of enzymes functions in t…
ENSG00000100842	EFS	chr14	common	-2.92498	6.80731e-16	-2.17558	5.9677e-07	embryonal Fyn-associated substrate	The longest protein isoform encoded by this gene contains an SH3 domain, which is known to be important in intracellular signal transduction. The protein encoded by a similiar gene in mice was shown to bind to SH3 domains of protein-tyrosine kinases. The function of this gene is unknown. Three alternatively spliced variants encoding different isoforms have been described for this gene. [provided …
ENSG00000068383	INPP5A	chr10	common	-1.38025	7.93485e-16	-1.21815	3.11023e-07	inositol polyphosphate-5-phosphatase A	The protein encoded by this gene is a membrane-associated type I inositol 1,4,5-trisphosphate (InsP3) 5-phosphatase. InsP3 5-phosphatases hydrolyze Ins(1,4,5)P3, which mobilizes intracellular calcium and acts as a second messenger mediating cell responses to various stimulation. [provided by RefSeq, Jul 2008].
ENSG00000078549	ADCYAP1R1	chr7	common	-4.60913	8.39285e-16	-4.89447	9.09684e-14	ADCYAP receptor type I	This gene encodes type I adenylate cyclase activating polypeptide receptor, which is a membrane-associated protein and shares significant homology with members of the glucagon/secretin receptor family. This receptor mediates diverse biological actions of adenylate cyclase activating polypeptide 1 and is positively coupled to adenylate cyclase. Multiple alternatively spliced transcript variants en…
ENSG00000109846	CRYAB	chr11	common	-3.3743	8.39285e-16	-2.86054	3.18933e-09	crystallin alpha B	Mammalian lens crystallins are divided into alpha, beta, and gamma families. Alpha crystallins are composed of two gene products: alpha-A and alpha-B, for acidic and basic, respectively. Alpha crystallins can be induced by heat shock and are members of the small heat shock protein (HSP20) family. They act as molecular chaperones although they do not renature proteins and release them in the fashi…
ENSG00000169679	BUB1	chr2	common	2.48729	8.50216e-16	2.80343	2.47197e-09	BUB1 mitotic checkpoint serine/threonine kinase	This gene encodes a serine/threonine-protein kinase that play a central role in mitosis. The encoded protein functions in part by phosphorylating members of the mitotic checkpoint complex and activating the spindle checkpoint. This protein also plays a role in inhibiting the activation of the anaphase promoting complex/cyclosome. This protein may also function in the DNA damage response. Mutation…
ENSG00000115556	PLCD4	chr2	common	-2.16199	8.81337e-16	-2.38042	1.52434e-16	phospholipase C delta 4	This gene encodes a member of the delta class of phospholipase C enzymes. Phospholipase C enzymes play a critical role in many cellular processes by hydrolyzing phosphatidylinositol 4,5-bisphosphate into two intracellular second messengers, inositol 1,4,5-trisphosphate and diacylglycerol. Expression of this gene may be a marker for cancer. [provided by RefSeq, Jan 2011].
ENSG00000184445	KNTC1	chr12	common	1.64283	9.21181e-16	1.44811	1.11271e-05	kinetochore associated 1	This gene encodes a protein that is one of many involved in mechanisms to ensure proper chromosome segregation during cell division. Experimental evidence indicated that the encoded protein functioned in a similar manner to that of the Drosophila rough deal protein. [provided by RefSeq, Jul 2008].
ENSG00000167513	CDT1	chr16	common	2.48793	9.56176e-16	2.05985	2.59563e-05	chromatin licensing and DNA replication factor 1	The protein encoded by this gene is involved in the formation of the pre-replication complex that is necessary for DNA replication. The encoded protein can bind geminin, which prevents replication and may function to prevent this protein from initiating replication at inappropriate origins. Phosphorylation of this protein by cyclin A-dependent kinases results in degradation of the protein. [provi…
ENSG00000088325	TPX2	chr20	common	2.71261	9.67867e-16	3.04075	1.26944e-09	TPX2 microtubule nucleation factor	NA
ENSG00000171617	ENC1	chr5	common	2.49727	9.75922e-16	1.8884	1.01485e-05	ectodermal-neural cortex 1	This gene encodes a member of the kelch-related family of actin-binding proteins. The encoded protein plays a role in the oxidative stress response as a regulator of the transcription factor Nrf2, and expression of this gene may play a role in malignant transformation. Alternatively spliced transcript variants encoding multiple isoforms have been observed for this gene. [provided by RefSeq, Feb 2…
ENSG00000180155	LYNX1	chr8	common	-4.89931	1.07997e-15	-2.13762	0.00187564	Ly6/neurotoxin 1	This gene encodes a GPI-anchored, cell membrane bound member of the Ly6/uPAR (LU) superfamily of proteins containing the unique three-finger LU domain. This protein interacts with nicotinic acetylcholine receptors (nAChRs), and is thought to function as a modulator of nAChR activity to prevent excessive excitation. Alternatively spliced transcript variants have been found for this gene. Read-thro…
ENSG00000111641	NOP2	chr12	common	1.48475	1.09041e-15	1.27319	5.2072e-06	NOP2 nucleolar protein	NA
ENSG00000119969	HELLS	chr10	common	2.13529	1.15309e-15	1.76863	6.44127e-07	helicase, lymphoid specific	This gene encodes a lymphoid-specific helicase. Other helicases function in processes involving DNA strand separation, including replication, repair, recombination, and transcription. This protein is thought to be involved with cellular proliferation and may play a role in leukemogenesis. Alternatively spliced transcript variants encoding different isoforms have been identified. [provided by RefS…
ENSG00000128594	LRRC4	chr7	common	-2.59678	1.15309e-15	-2.68837	2.82359e-14	leucine rich repeat containing 4	This gene is significantly downregulated in primary brain tumors. The exact function of the protein encoded by this gene is unknown. [provided by RefSeq, Jul 2008].
ENSG00000167676	PLIN4	chr19	common	-4.83622	1.22916e-15	-4.88635	5.04688e-11	perilipin 4	Members of the perilipin family, such as PLIN4, coat intracellular lipid storage droplets (Wolins et al., 2003 [PubMed 12840023]).[supplied by OMIM, Feb 2010].
ENSG00000175161	CADM2	chr3	common	-4.74457	1.34327e-15	-4.86342	1.4295e-10	cell adhesion molecule 2	This gene encodes a member of the synaptic cell adhesion molecule 1 (SynCAM) family which belongs to the immunoglobulin (Ig) superfamily. The encoded protein has three Ig-like domains and a cytosolic protein 4.1 binding site near the C-terminus. Proteins belonging to the protein 4.1 family crosslink spectrin and interact with other cytoskeletal proteins. Multiple transcript variants encoding diff…
ENSG00000125485	DDX31	chr9	male_specific	1.29324	1.36834e-15	NA	NA	DEAD-box helicase 31	DEAD box proteins, characterized by the conserved motif Asp-Glu-Ala-Asp (DEAD), are putative RNA helicases. They are implicated in a number of cellular processes involving alteration of RNA secondary structure such as translation initiation, nuclear and mitochondrial splicing, and ribosome and spliceosome assembly. Based on their distribution patterns, some members of this DEAD box protein family…
ENSG00000183578	TNFAIP8L3	chr15	common	-2.60529	1.36834e-15	-1.92226	6.94662e-05	TNF alpha induced protein 8 like 3	NA
ENSG00000076382	SPAG5	chr17	common	2.29557	1.50638e-15	2.57671	1.32923e-09	sperm associated antigen 5	This gene encodes a protein associated with the mitotic spindle apparatus. The encoded protein may be involved in the functional and dynamic regulation of mitotic spindles. [provided by RefSeq, Jul 2008].
ENSG00000102547	CAB39L	chr13	common	-2.31061	1.60859e-15	-2.35525	3.08215e-11	calcium binding protein 39 like	NA
ENSG00000152137	HSPB8	chr12	common	-3.79601	1.8618e-15	-3.37181	1.87832e-10	heat shock protein family B (small) member 8	The protein encoded by this gene belongs to the superfamily of small heat-shock proteins containing a conservative alpha-crystallin domain at the C-terminal part of the molecule. The expression of this gene in induced by estrogen in estrogen receptor-positive breast cancer cells, and this protein also functions as a chaperone in association with Bag3, a stimulator of macroautophagy. Thus, this ge…
ENSG00000136546	SCN7A	chr2	common	-4.69482	1.91608e-15	-4.54537	4.98912e-11	sodium voltage-gated channel alpha subunit 7	This gene encodes one of the many voltage-gated sodium channel proteins. For proper functioning of neurons and muscles during action potentials, voltage-gated sodium channels direct sodium ion diffusion for membrane depolarization. This sodium channel protein has some atypical characteristics; the similarity between the human and mouse proteins is lower compared to other orthologous sodium channe…
ENSG00000126950	TMEM35	chrX	common	-4.25164	2.01021e-15	-4.59098	1.04973e-11	transmembrane protein 35A	NA
ENSG00000134690	CDCA8	chr1	common	2.22737	2.01021e-15	2.3186	3.36876e-07	cell division cycle associated 8	This gene encodes a component of the chromosomal passenger complex. This complex is an essential regulator of mitosis and cell division. This protein is cell-cycle regulated and is required for chromatin-induced microtubule stabilization and spindle formation. Alternate splicing results in multiple transcript variants. Pseudgenes of this gene are found on chromosomes 7, 8 and 16. [provided by Ref…
ENSG00000107815	C10orf2	chr10	common	1.57032	2.02335e-15	1.31886	1.1028e-05	twinkle mtDNA helicase	This gene encodes a hexameric DNA helicase which unwinds short stretches of double-stranded DNA in the 5' to 3' direction and, along with mitochondrial single-stranded DNA binding protein and mtDNA polymerase gamma, is thought to play a key role in mtDNA replication. The protein localizes to the mitochondrial matrix and mitochondrial nucleoids. Mutations in this gene cause infantile onset spinoce…
ENSG00000154721	JAM2	chr21	common	-2.60855	2.1445e-15	-2.24618	2.58923e-06	junctional adhesion molecule 2	This gene belongs to the immunoglobulin superfamily, and the junctional adhesion molecule (JAM) family. The protein encoded by this gene is a type I membrane protein that is localized at the tight junctions of both epithelial and endothelial cells. It acts as an adhesive ligand for interacting with a variety of immune cell types, and may play a role in lymphocyte homing to secondary lymphoid orga…
ENSG00000172260	NEGR1	chr1	common	-3.27196	2.36706e-15	-2.77725	4.22513e-08	neuronal growth regulator 1	NA
ENSG00000141504	SAT2	chr17	male_specific	-1.41475	2.62537e-15	NA	NA	spermidine/spermine N1-acetyltransferase family member 2	NA
ENSG00000175906	ARL4D	chr17	common	-3.52177	2.97776e-15	-2.25565	9.19088e-06	ADP ribosylation factor like GTPase 4D	ADP-ribosylation factor 4D is a member of the ADP-ribosylation factor family of GTP-binding proteins. ARL4D is closely similar to ARL4A and ARL4C and each has a nuclear localization signal and an unusually high guanine nucleotide exchange rate. This protein may play a role in membrane-associated intracellular trafficking. Mutations in this gene have been associated with Bardet-Biedl syndrome (BBS…
ENSG00000119285	HEATR1	chr1	male_specific	1.40165	2.99458e-15	NA	NA	HEAT repeat containing 1	NA
ENSG00000065320	NTN1	chr17	common	-3.09129	3.00837e-15	-2.65194	3.03823e-07	netrin 1	Netrin is included in a family of laminin-related secreted proteins. The function of this gene has not yet been defined; however, netrin is thought to be involved in axon guidance and cell migration during development. Mutations and loss of expression of netrin suggest that variation in netrin may be involved in cancer development. [provided by RefSeq, Jul 2008].
ENSG00000182481	KPNA2	chr17	common	1.74816	3.07837e-15	1.98324	5.08856e-09	karyopherin subunit alpha 2	The import of proteins into the nucleus is a process that involves at least 2 steps. The first is an energy-independent docking of the protein to the nuclear envelope and the second is an energy-dependent translocation through the nuclear pore complex. Imported proteins require a nuclear localization sequence (NLS) which generally consists of a short region of basic amino acids or 2 such regions …
ENSG00000166819	PLIN1	chr15	common	-4.16827	3.1695e-15	-4.12055	1.28783e-06	perilipin 1	The protein encoded by this gene coats lipid storage droplets in adipocytes, thereby protecting them until they can be broken down by hormone-sensitive lipase. The encoded protein is the major cAMP-dependent protein kinase substrate in adipocytes and, when unphosphorylated, may play a role in the inhibition of lipolysis. Alternatively spliced transcript variants varying in the 5' UTR, but encodin…
ENSG00000160445	ZER1	chr9	male_specific	-1.06636	3.22301e-15	NA	NA	zyg-11 related cell cycle regulator	This gene encodes a subunit of an E3 ubiquitin ligase complex that may be involved in meiosis. The encoded protein contains three leucine-rich repeat motifs. [provided by RefSeq, Nov 2012].
ENSG00000130037	KCNA5	chr12	common	-3.54403	3.23955e-15	-3.68766	1.1363e-11	potassium voltage-gated channel subfamily A member 5	Potassium channels represent the most complex class of voltage-gated ino channels from both functional and structural standpoints. Their diverse functions include regulating neurotransmitter release, heart rate, insulin secretion, neuronal excitability, epithelial electrolyte transport, smooth muscle contraction, and cell volume. Four sequence-related potassium channel genes - shaker, shaw, shab,…
ENSG00000130826	DKC1	chrX	common	1.43101	3.23955e-15	1.41357	5.50768e-07	dyskerin pseudouridine synthase 1	This gene functions in two distinct complexes. It plays an active role in telomerase stabilization and maintenance, as well as recognition of snoRNAs containing H/ACA sequences which provides stability during biogenesis and assembly into H/ACA small nucleolar RNA ribonucleoproteins (snoRNPs). This gene is highly conserved and widely expressed, and may play additional roles in nucleo-cytoplasmic s…
ENSG00000101057	MYBL2	chr20	common	3.00666	3.30568e-15	3.21465	1.24454e-07	MYB proto-oncogene like 2	The protein encoded by this gene, a member of the MYB family of transcription factor genes, is a nuclear protein involved in cell cycle progression. The encoded protein is phosphorylated by cyclin A/cyclin-dependent kinase 2 during the S-phase of the cell cycle and possesses both activator and repressor activities. It has been shown to activate the cell division cycle 2, cyclin D1, and insulin-li…
ENSG00000114200	BCHE	chr3	common	-4.60157	3.35244e-15	-4.74787	3.67424e-10	butyrylcholinesterase	This gene encodes a cholinesterase enzyme and member of the type-B carboxylesterase/lipase family of proteins. The encoded enzyme exhibits broad substrate specificity and is involved in the detoxification of poisons including organophosphate nerve agents and pesticides, and the metabolism of drugs including cocaine, heroin and aspirin. Humans homozygous for certain mutations in this gene exhibit …
ENSG00000164442	CITED2	chr6	common	-1.78046	3.35244e-15	-1.64679	1.24904e-11	Cbp/p300 interacting transactivator with Glu/Asp rich carboxy-terminal domain 2	The protein encoded by this gene inhibits transactivation of HIF1A-induced genes by competing with binding of hypoxia-inducible factor 1-alpha to p300-CH1. Mutations in this gene are a cause of cardiac septal defects. Alternatively spliced transcript variants encoding multiple isoforms have been observed for this gene. [provided by RefSeq, May 2012].
ENSG00000205363	C15orf59	chr15	common	-3.12394	3.35244e-15	-1.99338	5.33632e-05	inhibitory synaptic factor 1	NA
ENSG00000131747	TOP2A	chr17	common	3.07661	3.39652e-15	3.22563	1.54248e-08	DNA topoisomerase II alpha	This gene encodes a DNA topoisomerase, an enzyme that controls and alters the topologic states of DNA during transcription. This nuclear enzyme is involved in processes such as chromosome condensation, chromatid separation, and the relief of torsional stress that occurs during DNA transcription and replication. It catalyzes the transient breaking and rejoining of two strands of duplex DNA which a…
ENSG00000159388	BTG2	chr1	common	-2.43315	3.51942e-15	-2.88675	1.61571e-18	BTG anti-proliferation factor 2	The protein encoded by this gene is a member of the BTG/Tob family. This family has structurally related proteins that appear to have antiproliferative properties. This encoded protein is involved in the regulation of the G1/S transition of the cell cycle. [provided by RefSeq, Jul 2008].
ENSG00000249082	C5orf66-AS1	chr5	common	-4.51285	4.14336e-15	-3.08722	8.03811e-05	C5orf66 antisense RNA 1	NA
ENSG00000034971	MYOC	chr1	common	-6.41465	4.28823e-15	-7.16868	4.21997e-11	myocilin	MYOC encodes the protein myocilin, which is believed to have a role in cytoskeletal function. MYOC is expressed in many occular tissues, including the trabecular meshwork, and was revealed to be the trabecular meshwork glucocorticoid-inducible response protein (TIGR). The trabecular meshwork is a specialized eye tissue essential in regulating intraocular pressure, and mutations in MYOC have been …
ENSG00000117597	DIEXF	chr1	male_specific	1.08691	4.39417e-15	NA	NA	UTP25 small subunit processor component	NA
ENSG00000135723	FHOD1	chr16	male_specific	1.15671	4.55095e-15	NA	NA	formin homology 2 domain containing 1	This gene encodes a protein which is a member of the formin/diaphanous family of proteins. The gene is ubiquitously expressed but is found in abundance in the spleen. The encoded protein has sequence homology to diaphanous and formin proteins within the Formin Homology (FH)1 and FH2 domains. It also contains a coiled-coil domain, a collagen-like domain, two nuclear localization signals, and sever…
ENSG00000127586	CHTF18	chr16	common	1.90712	4.99229e-15	1.76728	2.57487e-06	chromosome transmission fidelity factor 18	This gene encodes a protein which is a component of a replication factor C (RFC) complex, which loads proliferating cell nuclear antigen (PCNA) on to DNA during the S phase of cell cycle. The encoded protein may interact with other proteins, including RFC complex 3, to form a clamp loader complex that plays a role in sister chromatid cohesion during metaphase-anaphase transition. [provided by Ref…
ENSG00000135451	TROAP	chr12	common	2.56525	5.06719e-15	2.87924	2.53041e-08	trophinin associated protein	NA
ENSG00000162706	CADM3	chr1	common	-4.08767	5.2898e-15	-4.06419	1.09519e-07	cell adhesion molecule 3	The protein encoded by this gene is a calcium-independent cell-cell adhesion protein that can form homodimers or heterodimers with other nectin proteins. The encoded protein has both homophilic and heterophilic cell-cell adhesion activity. This gene is reported to be a tumor suppressor gene. [provided by RefSeq, Oct 2016].
ENSG00000205364	MT1M	chr16	common	-3.86804	5.40123e-15	-3.4202	1.0457e-05	metallothionein 1M	This gene encodes a member of the metallothionein superfamily, type 1 family. Metallothioneins have a high content of cysteine residues that bind various heavy metals. These genes are transcriptionally regulated by both heavy metals and glucocorticoids. [provided by RefSeq, Oct 2011].
[truncated: 2,442 more rows]

## Sheet: Table5
Differentially expressed genes between tumour and matched-normal tissues (TCGA) in males and females thyroid
ensembl_ID: ensembl gene ID
gene_symbol: gene symbol
chrom: chromosome number
state: tissue differential expression (TDE) state. common - TDE in males and females; males_specific - TDE only in males; females_specific - TDE only in females
[truncated: 1,636 more rows]

## Sheet: Table6
Differential expression between histological subtypes (in males) of hub genes from male-specific module in GC
ensembl_ID: ensembl gene ID
[truncated: 80 more rows]

## Sheet: Table7
Differential expression between histological subtypes (in females) of hub genes from female-specific module in TC
[truncated: 90 more rows]

[truncated: 1 more sheets: Table8]
